1     **A unified internal model theory to resolve the paradox of active versus passive**  
2                                                             **self-motion sensation**

3                                                             **Jean Laurens<sup>1</sup>, Dora Angelaki<sup>1</sup>**

4     <sup>1</sup>Department of Neuroscience, Baylor College of Medicine, 1 Baylor Plaza, Houston, TX, 77030

5

6

7                                                             **Abstract**

8     Brainstem and cerebellar neurons implement an internal model to accurately estimate self-motion  
9     during externally-generated ('passive') movements. However, these neurons show reduced responses  
10    during self-generated ('active') movements, indicating that the brain computes the predicted sensory  
11    consequences of motor commands in order to cancel sensory signals. Remarkably, the computational  
12    processes underlying sensory prediction during active motion and their relationship to internal model  
13    computations established during passive movements remain unknown. Here we construct a Kalman  
14    filter that incorporates motor commands into a previously-established model of optimal passive self-  
15    motion estimation. We find that the simulated sensory error and feedback signals match experimentally  
16    measured neuronal response during active and passive head and trunk rotations and translations. We  
17    conclude that a single internal model of head motion can process motor commands and sensory  
18    afferent signals optimally, and we describe how previously identified neural responses in the brainstem  
19    and cerebellum may represent distinct nodes in these computations.

20

21

22

## Introduction

23 For many decades, research on vestibular function has used passive motion stimuli generated by  
24 rotating chairs, motion platforms or centrifuges to characterize the responses of the vestibular motion  
25 sensors in the inner ear and the subsequent stages of neuronal processing. This research has revealed  
26 elegant computations where the brain uses an internal model to overcome the dynamic limitations and  
27 ambiguities of the vestibular sensors (Mayne 1974; Oman 1982; Borah et al. 1988; Merfeld 1995; Zupan  
28 and Merfeld, 2002; Laurens 2006; Laurens and Droulez 2007, 2008; Laurens and Angelaki 2011; Karmali  
29 and Merfeld 2012; Lim et al. 2017). Neuronal correlates of these computations have been identified in  
30 brainstem and cerebellum (Angelaki et al. 2004; Shaikh et al. 2005; Yakusheva et al. 2007, 2008, 2013,  
31 Laurens et al. 2013a,b).

32 In the past decade, a few research groups have also studied how brainstem and cerebellar neurons  
33 modulate during active, self-generated head movements. Strikingly, several types of neurons, well-  
34 known for responding to vestibular stimuli during passive movement, lose or reduce their sensitivity  
35 during self-generated movement (Gdowski et al. 2000; Gdowski and McCrea 1999; Marlinski and  
36 McCrea 2009; McCrea et al. 1999; McCrea and Luan 2003; Roy and Cullen 2001; 2004; Brooks and Cullen  
37 2009, 2013, 2014; Brooks et al. 2015; Carriot et al. 2014). In contrast, vestibular afferents respond  
38 indiscriminately for active and passive stimuli (Cullen and Minor 2002; Sadeghi et al. 2007; Jamali et al.  
39 2009). These properties resemble sensory prediction errors in other sensorimotor functions such as fish  
40 electrosensation (Requarth and Sawtell 2011; Kennedy et al. 2014) and motor control (Tseng et al. 2007,  
41 Shadmer et al. 2010). Yet, a consistent quantitative take-home message has been lacking. Initial  
42 experiments implicated proprioceptive switches (Roy and Cullen, 2001; 2004). More recently, elegant  
43 experiments by Brooks, Cullen and colleagues (Brooks et al., 2015; Brooks and Cullen, 2015; Cullen and  
44 Brooks, 2015) have provided strong evidence that the brain predicts how self-generated motion

45 activates the vestibular organs, and subtracts these predictions from afferent signals to generate  
46 sensory errors. The preferential response to passive motion, or to the passive components of combined  
47 active and passive motion, is then easily interpreted as sensory prediction error signals. However, the  
48 computational processes underlying this 'prediction' remain unclear.

49 Confronting the findings of studies utilizing passive and active motion stimuli leads to a paradox, where  
50 the brain appears to implement an elaborate internal model to process vestibular sensory signals, but  
51 suppresses the input of this internal model during self-generated motion. Thus, a highly influential  
52 interpretation is that the elaborate internal model characterized with passive stimuli would only be  
53 useful in situations that involve unexpected (passive) movements, such as recovering from loss of  
54 balance, but would remain unused during most normal activities. Here we propose an alternative - that  
55 the same internal model described previously for passive head movements also processes efference  
56 copies of motor commands during active head movements. Critically, we also demonstrate that accurate  
57 self-motion estimation would be severely compromised if signals were not processed by an identical  
58 internal model during actively-generated movements.

59 The essence of the theory developed previously for passive movements is that the brain uses an internal  
60 representation of the laws of physics and sensory dynamics (which can be elegantly modeled as forward  
61 internal models of the sensors) to process vestibular signals. In contrast, although it is understood that  
62 transforming head motor commands into sensory predictions is likely to also involve internal models, no  
63 explicit mathematical implementation has ever been proposed. Are the two internal models distinct?  
64 This is doubtful, because the same vestibular and cerebellar neurons appear involved in both (Angelaki  
65 and Cullen, 2008). If implemented by overlapping neural populations, how are the two internal models  
66 related to each other? A survey of the many studies by Cullen and colleagues even questions the origin  
67 of the sensory signals canceling vestibular afferent activity, as early studies emphasized a critical role of

68 neck proprioception (Roy and Cullen, 2001; 2004). More recent studies generally implicate the  
69 generation of sensory prediction errors, without ever specifying whether the implicated forward internal  
70 models involve vestibular or proprioceptive cues (Brooks et al., 2015). We will show here that active and  
71 passive motion should be processed by the same forward internal models of all sensors involved in head  
72 motion sensation: canals, otolith and neck proprioceptors.

73 To demonstrate the unified framework governing self-motion sensation during both active and passive  
74 head movements, we use the framework of the Kalman filter (Fig. 1; Kalman 1960), which represents  
75 the simplest and most commonly used mathematical technique to implement statistically optimal  
76 dynamic estimation and explicitly computes sensory prediction errors. Here we build a quantitative  
77 Kalman filter model that integrates motor commands and vestibular signals during active and passive  
78 rotations, tilts and translations. We show how the same internal model may process both active and  
79 passive motion stimuli and provide quantitative simulations that reproduce a wide range of behavioral  
80 and neuronal responses. These simulations also generate testable predictions, in particular which  
81 passive stimuli should induce sensory errors and which should not, that may motivate future studies and  
82 guide interpretation of experimental findings. Finally, we summarize these internal model computations  
83 into a schematic diagram, and we discuss how various populations of brainstem and cerebellar neurons  
84 may encode the underlying sensory error or feedback signals.

85

86

## Results

### 87 Overview of Kalman filter model of head motion

88 A Kalman filter (Kalman 1960) is based on a forward model of a dynamical system, defined by a set of  
89 state variables  $X$  that are driven by their own dynamics, motor commands  $X^u$  and internal or external

90 perturbations  $X^\varepsilon$ . The evolution of  $X$  is modeled as  $X(t) = D.X(t - 1) + M.X^u(t) + E.X^\varepsilon$  (Fig. 1A,  
91 left) where matrices  $D$ ,  $M$  and  $E$  reflect the system's dynamics and response to motor inputs and  
92 perturbations, respectively. A set of sensors, grouped in a variable  $S$ , measures state variables or  
93 combinations thereof (encoded in a matrix  $T$ ) that can be modeled as  $S(t) = T.X(t) + S^\eta(t)$ , where  
94  $S^\eta$  is sensory noise (Fig. 1A, right). Note that  $S$  may provide ambiguous or incomplete information, since  
95 some sensors may measure a mixture of state variables, and some variables may not be measured at all.

96 The Kalman filter, schematically represented in Fig. 1B, uses the available information to track an  
97 optimal internal estimate of the state variable  $\hat{X}$ . At each time  $t$ , the Kalman filter computes a  
98 preliminary estimate (also called a prediction)  $\hat{X}^p(t) = D.\hat{X}(t - 1) + M.X^u(t)$  and a corresponding  
99 predicted sensory signal  $\hat{S}^p = T.\hat{X}^p$ . In general, the resulting state estimate  $\hat{X}^p$  and the predicted  
100 sensory prediction  $\hat{S}^p$  may differ from the real values  $X$  and  $S$  because: (1)  $X^\varepsilon \neq 0$ , but the brain cannot  
101 predict the perturbation  $X^\varepsilon(t)$ , (2) the brain doesn't know the value of the sensory noise  $S^\eta(t)$  and (3)  
102 the previous estimate  $\hat{X}(t - 1)$  used to compute  $\hat{X}^p(t)$  could be incorrect. These errors are reduced  
103 using sensory information, as follows (Fig. 1B): First, the prediction  $\hat{S}^p$  and the sensory input  $S$  are  
104 compared to compute a sensory error  $\delta S$ . Second, sensory errors are transformed into a feedback  
105  $X^k = K.\delta S$  where  $K$  is a matrix of feedback gains, whose dimensionality depends on both the state  
106 variable  $X$  and the sensory inputs. Thus, an improved estimate at time  $t$  is  $\hat{X}(t) = \hat{X}^p(t) + K.\delta S(t)$ .

107 The feedback gain matrix  $K$  determines how sensory errors improve the final estimate  $\hat{X}$ , and is  
108 computed based on  $D$ ,  $E$ ,  $T$  and on the variances of  $X^\varepsilon$  and  $S^\eta$  (see Suppl. Methods, 'Kalman filter  
109 algorithm' for details).

110 Fig. 2 applies this framework to the problem of estimating self-motion (rotation, tilt, and translation)  
111 using vestibular sensors, with two types of motor commands: angular velocity ( $\Omega^u$ ) and translational  
112 acceleration ( $A^u$ ), with corresponding unpredicted inputs,  $\Omega^\varepsilon$  and  $A^\varepsilon$  (Fig. 2A) that represent passive

113 motion or motor error (see Discussion: ‘Role of the vestibular system during active motion:  
114 fundamental, ecological and clinical implications’). The sensory signals ( $S$ ) we consider initially  
115 encompass the semicircular canals (rotation sensors that generate a sensory signal  $V$ ) and the otoliths  
116 organs (linear acceleration sensors that generate a sensory signal  $F$ ) – proprioception is also added in  
117 subsequent sections. Each of these sensors has distinct properties, which can be accounted for by the  
118 internal model of the sensors ( $T$  in Fig. 1). The semicircular canals exhibit high-pass dynamic properties,  
119 which are modeled by another state variable  $C(t)$  (see Suppl. Methods, ‘Model of head motion and  
120 vestibular sensors’). The otolith sensors exhibit negligible dynamics, but are fundamentally ambiguous:  
121 they sense gravitational as well as linear acceleration – a fundamental ambiguity resulting from  
122 Einstein’s equivalence principle [Einstein 1907; modeled here as  $G(t) = \int \Omega(t).dt$  and  $F(t) = G(t) +$   
123  $A(t)$ ; note that  $G$  and  $A$  are expressed in comparable units; see Methods; “Simulation parameters”].  
124 Thus, in total, the state variable  $X$  has 4-degrees of freedom (Fig. 2A): angular velocity  $\Omega$  and linear  
125 acceleration  $A$  (which are the input/output variables directly controlled), as well as  $C$  (a hidden variable  
126 that must be included to model the dynamics of the semicircular canals) and tilt position  $G$  (another  
127 hidden variable that depends on rotations  $\Omega$ , necessary to model the sensory ambiguity of the otolith  
128 organs).

129 The Kalman filter computes optimal estimates  $\hat{\Omega}(t)$ ,  $\hat{G}(t)$ ,  $\hat{A}(t)$  and  $\hat{C}(t)$  based on motor commands  
130 and sensory signals. Note that we don’t introduce any tilt motor command, as tilt is assumed to be  
131 controlled only indirectly through rotation commands ( $\Omega^u$ ). For simplicity, we restrict self-motion to a  
132 single axis of rotation (e.g., roll) and a single axis of translation (inter-aural). The model can simulate  
133 either rotations in the absence of head tilt (e.g., rotations around an earth-vertical axis: EVAR, Fig. 2B) or  
134 tilt (Fig. 2C, where tilt is the integral of rotation velocity,  $G(t) = \int \Omega(t).dt$ ) using a switch (but see  
135 Suppl. Methods, ‘Three-dimensional Kalman filter’ for a 3D model). Sensory errors are used to correct  
136 internal motion estimates using the Kalman gain matrix, such that the Kalman filter as a whole performs

137 optimal estimation. In theory, the Kalman filter includes a total of 8 feedback signals, corresponding to  
138 the combination of 2 sensory (canal and otolith) errors and 4 internal states ( $\hat{\Omega}(t)$ ,  $\hat{G}(t)$ ,  $\hat{A}(t)$  and  $\hat{C}(t)$ ].  
139 From those 8 feedback signals, two are always negligible; see Suppl. Methods, ‘Kalman feedback gains’).  
140 We will show how this model performs optimal estimation of self-motion using motor commands and  
141 vestibular sensory signals in a series of increasingly complex simulations. We start with a very short  
142 (200ms) EVAR stimulus, where canal dynamics is negligible (Fig. 3), followed by a longer EVAR that  
143 highlights the role of an internal model of the canals (Fig. 4). Next, we consider the more complex tilt  
144 and translation movements that require all 4 state variables to demonstrate how canal and otolith  
145 errors interact to disambiguate otolith signals (Fig. 5, 6). Finally, we extend our model to simulate  
146 independent movement of the head and trunk by incorporating neck proprioceptive sensory signals (Fig.  
147 7). For each motion paradigm, identical active and passive motion simulations will be shown side by side  
148 in order to demonstrate how the internal model integrates sensory information and motor commands.  
149 We show that the Kalman feedback plays a preeminent role, which explains why lots of brain machinery  
150 is devoted to its implementation (see Discussion). For convenience, all mathematical notations are  
151 summarized in Table 1. For Kalman feedback gain nomenclature and numerical values, see Table 2.

## 152 **Passive motion induces sensory errors**

153 Previous studies (McCrea and Luan 2003; Roy and Cullen 2001; 2004; Brooks and Cullen 2014) have  
154 proposed that vestibular and rostral fastigial nuclei neurons that respond specifically to passive  
155 rotations encode sensory errors resulting from the discrepancy between vestibular signals and the  
156 expected consequences of motor commands. Here, we demonstrate that the Kalman filter predicts  
157 sensory discrepancies consistent with these results.

158 In Fig. 3, we simulate rotations around an earth-vertical axis (Fig. 3A) with a short duration (0.2s, Fig.  
159 3B), chosen to minimize canal dynamics ( $C \approx 0$ , Fig. 3B, cyan) such that the canal response matches the

160 velocity stimulus ( $V \approx \Omega$ , compare magenta curve in Fig. 3C with blue curve in Fig. 3B). We simulate  
161 active motion (Fig. 3D-K, left panels), where  $\Omega = \Omega^u$  (Fig. 3D) and  $\Omega^e = 0$  (not shown), as well as passive  
162 motion (Fig. 3D-K, right panels), where  $\Omega = \Omega^e$  (Fig. 3D) and  $\Omega^u = 0$  (not shown). The rotation velocity  
163 stimulus ( $\Omega$ , Fig. 3E, blue) and canal activation ( $V$ , Fig. 3F, magenta) are identical in both active and  
164 passive stimulus conditions. As expected, the final velocity estimate  $\hat{\Omega}$  (output of the filter, Fig. 3G,  
165 blue) is equal to the stimulus  $\Omega$  (Fig. 3E, blue) during both passive and active conditions. Thus, this first  
166 simulation is meant to emphasize differences in the flow of information *within* the Kalman filter, rather  
167 than differences in performance between passive and active motion (which is identical).

168 The fundamental difference between active and passive motion resides in the prediction of head motion  
169 (Fig. 3H) and sensory canal signals (Fig. 3I). During active motion, the motor command  $\Omega^u$  (Fig. 3D) is  
170 converted into a predicted rotation  $\hat{\Omega}^p = \Omega^u$  (Fig. 3H) by the internal model, and in turn in a predicted  
171 canal signal  $\hat{V}^p$  (Fig. 3I). Of course, in this case, we have purposely chosen the rotation stimulus to be so  
172 short (0.2s), such that canal afferents reliably encode the rotation stimulus ( $V \approx \Omega$ ; compare Fig. 3F and  
173 3E, left panels) and the internal model of canals dynamics has a negligible contribution; i.e.,  $\hat{\Omega}^p \approx \hat{V}^p$   
174 (compare Fig. 3I and 3H, left panels). Because the canal sensory error is null, i.e.  $\delta V = V - \hat{V}^p \approx 0$  (Fig.  
175 3K, left panel), the Kalman feedback pathway remains silent (not shown) and the net motion estimate is  
176 unchanged compared to the prediction, i.e.  $\hat{\Omega} = \hat{\Omega}^p = \Omega^u = \Omega$ . In conclusion, during active rotation  
177 (and in the absence of perturbations, motor or sensory noise), motion estimates are generated entirely  
178 based on an accurate predictive process, in turn leading to an accurate prediction of canal afferent  
179 signals. In the absence of sensory mismatch, these estimates don't require any further adjustment.

180 In contrast, during passive motion the predicted rotation is null ( $\hat{\Omega}^p = 0$ , Fig. 3H, right panel), and  
181 therefore the predicted canal signal is also null ( $\hat{V}^p = 0$ , Fig. 3I, right panel). Therefore, canal signals  
182 during passive motion generate a sensory error  $\delta V = V - \hat{V}^p = V$  (Fig. 3K, right panel). This sensory



183 error is converted into a feedback signal  $\Omega^k = k_{\delta V}^{\Omega} \cdot \delta V$  (Fig. 3J) with a Kalman gain  $k_{\delta V}^{\Omega}$  (feedback from  
184 canal error  $\delta V$  to angular velocity estimate  $\Omega$ ) that is close to 1 (Table 2; note that this value represents  
185 an optimum and is computed by the Kalman filter algorithm). The final motion estimate is generated by  
186 this feedback, i.e.  $\hat{\Omega} = k_{\delta V}^{\Omega} \cdot \delta V = V \approx \Omega$ .

187 These results illustrate the fundamental rules of how active and passive motion signals are processed by  
188 the Kalman filter (and, as hypothesized, the brain). During active movements, motion estimates are  
189 generated by a *predictive mechanism*, where motor commands are fed into an internal model of head  
190 motion. During passive movement, motion estimates are formed based on *feedback signals* that are  
191 themselves driven by sensory canal signals. In both cases, specific nodes in the network are silent (e.g.,  
192 predicted canal signal during passive motion, Fig. 3I; canal error signal during active motion, Fig. 3K), but  
193 the same network operates in unison under *all* stimulus conditions. Thus, depending on whether the  
194 neuron recorded by a microelectrode in the brain carries *predicted*, *actual* or *error* sensory signals,  
195 differences in neural response modulation is expected between active and passive head motion. For  
196 example, if a cell encodes canal error exclusively, it will show maximal modulation during passive  
197 rotation, and no modulation at all during active head rotation. If a cell encodes mixtures of canal sensory  
198 error and actual canal sensory signals (e.g., through a direct canal afferent input), then there will be non-  
199 zero, but attenuated, modulation during active, compared to passive, head rotation. Indeed, a range of  
200 response attenuation has been reported in the vestibular nuclei (see Discussion).

201 We emphasize that in Fig. 3 we chose a *very* short-duration (0.2s) motion profile, where semicircular  
202 canal dynamics is negligible and the sensor can accurately follow the rotation velocity stimulus. We now  
203 consider more realistic rotation durations, and demonstrate how predictive and feedback mechanisms  
204 interact for accurate self-motion estimation. Specifically, canal afferent signals attenuate (because of  
205 their dynamics) during longer duration rotations – and this attenuation is already sizable for rotations

206 lasting 1s or longer. We next demonstrate that the internal model of canal dynamics must be engaged  
207 for accurate rotation estimation, even during purely actively-generated head movements.

## 208 **Internal model of canals**

209 We now simulate a longer head rotation, lasting 2s (Fig. 4A,B, blue). The difference between the actual  
210 head velocity  $\Omega$  and the average canal signal  $V$  is modeled as an internal state variable  $C$ , which follows  
211 low-pass dynamics (see Suppl. Methods, ‘Model of head motion and vestibular sensors’). At the end of  
212 the 2s rotation, the value of  $C$  reaches its peak at  $\sim 40\%$  of the rotation velocity (Fig. 4B, cyan), modeled  
213 to match precisely the afferent canal signal  $V$ , which decreases by a corresponding amount (Fig. 4C).  
214 Note that  $C$  persists when the rotation stops, matching the canal aftereffect ( $V = -C < 0$  after  $t > 2s$ ).  
215 Next we demonstrate how the Kalman filter uses the internal variable  $C$  to compensate for canal  
216 dynamics.

217 During active motion, the motor command  $\Omega^u$  (Fig. 4D) is converted into an accurate prediction of head  
218 velocity  $\hat{\Omega}^p$  (Fig. 4H, blue). Furthermore,  $\Omega^u$  is also fed through the internal model of the canals to  
219 predict  $\hat{C}^p$  (Fig. 4H, cyan). By combining the predicted internal state variables  $\hat{\Omega}^p$  and  $\hat{C}^p$ , the Kalman  
220 filter computes a canal prediction  $\hat{V}^p$  that follows the same dynamics as  $V$  (compare Fig. 4F and I, left  
221 panels). Therefore, as in Fig. 3, the resulting sensory mismatch is  $\delta V = V - \hat{V}^p \approx 0$  and the final  
222 estimates (Fig. 4G) are identical to the predicted estimates (Fig. 4H). Thus, the Kalman filter maintains an  
223 accurate rotation estimate by feeding motor commands through an internal model of the canal  
224 dynamics. Note, however, that because in this case  $V \neq \Omega$  (compare magenta curve in Fig. 4F and blue  
225 curve in Fig. 4E, left panels),  $\hat{V}^p \neq \hat{\Omega}^p$  (compare magenta curve in Fig. 4I and blue curve in Fig. 4H, left  
226 panels). Thus, the sensory mismatch can only be null under the assumption that motor commands have  
227 been processed through the internal model of the canals. But before we elaborate on this conclusion,  
228 let’s first consider passive stimulus processing.

229 During passive motion, the motor command  $\Omega^u$  is equal to zero. First, note that the final estimate  
230  $\hat{\Omega} \approx \Omega$  is accurate (Fig. 4G), as in Fig. 3G, although canal afferent signals don't encode  $\Omega$  accurately.  
231 Second, note that the internal estimate of canal dynamics  $\hat{C}$  (Fig. 4G) and the corresponding prediction  
232 ( $\hat{C}^p$ ; Fig. 4H) are both accurate (compare with Fig. 4E). This occurs because the canal error  $\delta V$  (Fig. 4K)  
233 is converted into a second feedback,  $C^k$ , (Fig. 4J, cyan), which updates the internal estimate  $\hat{C}$  (see  
234 Suppl. Methods, 'Velocity Storage'). Finally, in contrast to Fig. 3, the canal sensory error  $\delta V$  (Fig. 4K)  
235 does not follow the same dynamics as  $V$  (Fig. 4C,F), but is (as it should) equal to  $\Omega$  (Fig. 4B). This happens  
236 because, though a series of steps ( $\hat{V}^p = -\hat{C}^p$  in Fig. 4I and  $\delta V = V - \hat{V}^p$  in Fig. 4K),  $\hat{C}^p$  is added to the  
237 vestibular signal  $V$  to compute  $\delta V \approx \Omega$ . This leads to the final estimate  $\hat{\Omega} = \hat{\Omega}^p = \delta V \approx \Omega$  (Fig. 4G).  
238 Model simulations during even longer duration rotations and visual-vestibular interactions are  
239 illustrated in Fig. 4 Suppl. 1. Thus, the internal model of canal dynamics improves the rotation estimate  
240 during passive motion. Remarkably, this is important not only during very long duration rotations (as is  
241 often erroneously presumed), but also during short stimuli lasting 1-2s, as illustrated with the  
242 simulations in Fig. 4.

243 We now return to the actively-generated head rotations to ask the important question: What would  
244 happen if the brain didn't use an internal model of canal dynamics? We simulated motion estimation  
245 where canal dynamics was removed from the internal model used by the Kalman filter (Fig. 4 Suppl 2).  
246 During both active and passive motion, the net estimate  $\hat{\Omega}$  is inaccurate as it parallels  $V$ , exhibiting a  
247 decrease over time and an aftereffect. In particular, during active motion, the motor commands provide  
248 accurate signals  $\hat{\Omega}^p$ , but the internal model of the canals fails to convert them into a correct prediction  
249  $\hat{V}^p$ , resulting in a sensory mismatch. This mismatch is converted into a feedback signal  $\Omega^k$  that degrades  
250 the accurate prediction  $\hat{\Omega}^p$  such that the final estimate  $\hat{\Omega}$  is inaccurate. These simulations highlight the  
251 role of the internal model of canal dynamics, which continuously integrates rotation information in

252 order to anticipate canal afferent activity during *both* active and passive movements. Without this  
253 sensory internal model, active movements would result in sensory mismatch, and the brain could either  
254 transform this mismatch into sensory feedback, resulting in inaccurate motion estimates. Note that the  
255 need for the internal model is important even during natural short-duration and high-velocity head  
256 rotations (Fig. 4 Suppl. 3). Thus, even though particular nodes (neurons) in the circuit (e.g. vestibular and  
257 rostral fastigial nuclei cells presumably reflecting either  $\delta V$  or  $\Omega^k$  in Fig. 3, 4; see Discussion) are  
258 attenuated or silent during active head rotations, efference copies of motor commands must *always* be  
259 processed though the internal model of the canals – motor commands *cannot* directly drive appropriate  
260 sensory prediction errors. This intuition has remained largely unappreciated by studies comparing how  
261 central neurons modulate during active and passive rotations – a misunderstanding that has led to the  
262 seemingly strawman dichotomy belittling all important insights gained by decades of studies using  
263 passive motion stimuli (see Discussion).

#### 264 **Active versus passive tilt**

265 Next, we study the interactions between rotation, tilt and translation perception. We first simulate a  
266 short duration (0.2s) roll tilt (Fig. 5A; with a positive tilt velocity  $\Omega$ , Fig. 5B, blue). Tilt position ( $G$ , Fig. 5B,  
267 green) ramps during the rotation and then remains constant. As in Fig. 3, canal dynamics  $C$  is negligible  
268 ( $V \approx \Omega$ ; Fig. 5F, magenta) and the final rotation estimate  $\hat{\Omega}$  is accurate (Fig. 5G, blue). Also similar to Fig.  
269 3,  $\hat{\Omega}$  is carried by the predicted head velocity node during active motion ( $\hat{\Omega} \approx \hat{\Omega}^p$ ;  $\Omega^k \approx 0$ ) and by the  
270 Kalman feedback node during passive motion ( $\Omega \approx \Omega^k$ ;  $\hat{\Omega}^p \approx 0$ ). That is, the final rotation estimate,  
271 which is accurate during both active and passive movements, is carried by different nodes (thus, likely  
272 different cell types; see Discussion) within the neural network.

273 When rotations change orientation relative to gravity, another internal state (tilt position  $G$ , not  
274 included in the simulations of Fig. 3 and 4) and another sensor (otolith organs;  $F = G$  since  $A = 0$ ; Fig.

275 5F, black) are engaged. During actively-generated tilt movements, the rotation motor command ( $\Omega^u$ ) is  
276 temporally integrated by the internal model of head motion (see Eq. 3c of Suppl. Methods, ‘Kalman  
277 filter algorithm developed’), generating an accurate prediction of head tilt  $\hat{G}^p(t) = \int_0^t \Omega^u \cdot dt$  (Fig. 5H,  
278 left panel, green). This results in a correct prediction of the otolith signal  $\hat{F}^p$  (Fig. 5I, grey) and therefore,  
279 as in previous simulations of active movement, the sensory mismatch for both the canal and otolith  
280 signals (Fig. 5L, magenta and gray, respectively) and feedback signals (not shown) are null; and the final  
281 estimates, driven exclusively by the prediction, are accurate;  $\hat{G}(t) = \hat{G}^p(t)$  and  $\hat{\Omega}(t) = \hat{\Omega}^p(t)$ .

282 During passive tilt, the canal error,  $\delta V$ , is converted into Kalman feedback that updates  $\hat{\Omega}$  (Fig. 5K, blue)  
283 and  $\hat{C}$  (not shown here; but see Fig. 5 Suppl. 1 for 2s tilt simulations), as well as the two other state  
284 variables ( $\hat{G}$  and  $\hat{A}$ ). Specifically, the feedback from  $\delta V$  to  $\hat{G}$  ( $G^k$ ) updates the predicted tilt  $\hat{G}^p$  and is  
285 temporally integrated by the Kalman filter ( $\hat{G}(t) = \int_0^t G^k$ ; see Suppl. Methods, ‘Passive Tilt’; Fig. 5K,  
286 green). The feedback signal from  $\delta V$  to  $\hat{A}$  has a minimal impact, as illustrated in Fig. 5K, red (see also  
287 Suppl. Methods, ‘Kalman feedback gains’ and Table 2).

288 Because  $\delta V$  efficiently updates the tilt estimate  $\hat{G}$ , the otolith error  $\delta F$  is close to zero during passive tilt  
289 (Fig. 5L, gray; see Suppl. Methods, ‘Passive Tilt’) and therefore all feedback signals originating from  $\delta F$   
290 (Fig. 5J) play a minimal role (see Suppl. Methods, ‘Passive Tilt’) during pure tilt (this is the case even for  
291 longer duration stimuli; Fig. 5 Suppl. 1). This simulation highlights that, although tilt is sensed by the  
292 otoliths, passive tilt doesn’t induce any sizeable otolith error. Thus, unlike neurons tuned to canal error,  
293 the model predicts that those cells tuned to otolith error will not modulate during either passive or  
294 actively-generated head tilt. Therefore, cells tuned to otolith error would respond primarily during  
295 translation, and not during tilt, thus they would be identified ‘translation-selective’. Furthermore, the  
296 model predicts that those neurons tuned to passive tilt (e.g., Purkinje cells in the caudal cerebellar  
297 vermis; Laurens et al., 2013b) likely reflect canal error (Fig. 5L, magenta). Thus, the model predicts that

298 tilt-selective Purkinje cells should encode tilt velocity, and not tilt position, a prediction that remains to  
299 be tested experimentally (see Discussion).

### 300 **Otolith errors are interpreted as translation and tilt with distinct dynamics**

301 Next, we simulate a brief translation (Fig. 6). During active translation, we observe, as in previous  
302 simulations of active movements, that the predicted head motion matches the sensory (otolith in this  
303 case:  $F = A$ ) signals ( $\hat{A}^p = A$  and  $\hat{F}^p = F$ ). Therefore, as in previous simulations of active motion, the  
304 sensory prediction error is zero (Fig. 6L) and the final estimate is equal to, and driven by, the prediction  
305 ( $\hat{A} = \hat{A}^p = A$ ; Fig. 6G, red).

306 During passive translation, the predicted acceleration is null ( $\hat{A}^p = 0$ , Fig 6H, red), similar as during  
307 passive rotation in Fig. 3, 4). However, a sizeable tilt signal ( $\hat{G}^p$  and  $\hat{G}$ , Fig. 6G,H, green), develops over  
308 time. This (erroneous) tilt estimate can be explained as follows: soon after translation onset (vertical  
309 dashed lines in Fig. 6B-J),  $\hat{G}^p$  is close to zero. The corresponding predicted otolith signal is also close to  
310 zero ( $\hat{F}^p = \hat{A}^p + \hat{G}^p = 0$ ), leading to an otolith error  $\delta F \approx A$  (Fig. 6L, right, gray). Through the Kalman  
311 feedback gain matrix, this otolith error,  $\delta F$ , is converted into: (1) an acceleration feedback  $A^k$  (Fig. 6J,  
312 red) with gain  $k_{\delta F}^A = 0.995$  (the close to unity feedback gain indicates that otolith errors are interpreted  
313 as acceleration:  $\hat{A} = \delta F \approx A$ ; note however that the otolith error  $\delta F$  vanishes over time, as explained  
314 next); and (2) a tilt feedback  $G^k$  (Fig. 6J, green), with  $k_{\delta F}^G = 0.5 \cdot \delta t$ . This tilt feedback, although too weak  
315 to have any immediate effect, is integrated over time ( $\hat{G}(t) = \int_0^t G^k$ ; see Fig. 5 and Suppl. Methods,  
316 ‘Somatogravic effect’), generating the rising tilt estimate  $\hat{G}$  (Fig. 6G, green) and  $\hat{G}^p$  (Fig. 6H, green).

317 The fact that the Kalman gain feedback from the otolith error to the  $\hat{G}$  internal state generates the  
318 somatogravic effect is illustrated in Fig. 6 Suppl. 1, where a longer acceleration (20s) is simulated. At the  
319 level of final estimates (perception), these simulations predict the occurrence of tilt illusions during

320 sustained translation (somatogravic illusion; Graybiel 1952; Paige and Seidman 1999). Further  
321 simulations show how activation of the semicircular canals without a corresponding activation of the  
322 otoliths (e.g., during combination of tilt and translation; Angelaki et al., 2004; Yakusheva et al., 2007)  
323 leads to an otolith error (Fig. 6 Suppl. 2) and how signals from the otoliths (that sense indirectly whether  
324 or not the head rotates relative to gravity) can also influence the rotation estimate  $\hat{\Omega}$  at low frequencies  
325 (Fig. 6 Suppl. 3; this property has been extensively evaluated by Laurens and Angelaki, 2011). These  
326 simulations demonstrate that the Kalman filter model efficiently simulates all previous properties of  
327 both perception and neural responses during passive tilt and translation stimuli (see Discussion).

328 The model analyzed so far has considered only vestibular sensors. Nevertheless, active head rotations  
329 often also activate neck proprioceptors, when there is an independent rotation of the head relative to  
330 the trunk. Indeed, a number of studies (Brooks and Cullen 2009; 2013; Brooks et al. 2015) have  
331 identified neurons in the rostral fastigial nuclei that encode the rotation velocity of the trunk. These  
332 neurons receive convergent signals from the semicircular canals and neck muscle proprioception and,  
333 accordingly, are named ‘bimodal neurons’, to contrast with ‘unimodal neurons’, which encode passive  
334 head velocity. Because the bimodal neurons don’t respond to active head and trunk movements, they  
335 likely encode feedback signals related to trunk velocity. We developed a variant of the Kalman filter to  
336 model both unimodal and bimodal neuron types (Fig. 7; see also Suppl. Methods and Fig. 7 Suppl. 1-3).

### 337 **Neck proprioceptors and encoding of trunk versus head velocity**

338 The model tracks the velocity of the trunk in space  $\Omega_{TS}$  and the velocity of the head on the trunk  $\Omega_{HT}$  as  
339 well as neck position ( $N = \int \Omega_{HT} \cdot dt$ ). Sensory inputs are provided by the canals (that sense the total  
340 head velocity,  $\Omega = \Omega_{TS} + \Omega_{HT}$ ), and proprioceptive signals from the neck musculature, which are  
341 assumed to encode neck position ( $P$ ).

342 In line with previous simulations, we find that, during active motion, the predicted sensory signals are  
343 accurate. Consequently, the Kalman feedback pathways are silent (Fig. 7 Suppl. 1-3; active motion is not  
344 shown in Fig. 7). In contrast, passive motion induces sensory errors and Kalman feedbacks. The velocity  
345 feedback signals (elaborated in Fig. 7 Suppl. 1-3) have been re-plotted in Fig. 7, where we illustrate head  
346 in space (blue), trunk in space (gray), and head on trunk (red) velocity (neck position feedback signals  
347 are only shown in Fig. 7. Suppl. 1-3).

348 During passive whole head and trunk rotation, where the trunk rotates in space (Fig. 7A, Real motion:  
349  $\Omega_{TS} > 0$ , grey) and the head moves together with the trunk (head on trunk velocity  $\Omega_{HT} = 0$ , red, head  
350 in space  $\Omega > 0$ , blue), we find that the resulting feedbacks accurately encode these rotation  
351 components (Fig. 7A, Velocity Feedbacks; see also Fig. 7 Suppl. 1). During head on trunk rotation (Fig.  
352 7B, Fig. 7 Suppl. 2), the Kalman feedbacks accurately encode the head on trunk (red) or in space (blue)  
353 rotation, and the absence of trunk in space rotation (gray). Finally, during trunk under head rotation  
354 that simulates a rotation of the trunk while the head remains fixed in space, resulting in a neck counter-  
355 rotation, the various motion components are accurately encoded by Kalman feedbacks (Fig. 7C, Fig. 7  
356 Suppl. 3). We propose that unimodal and bimodal neurons reported in (Brooks and Cullen 2009, 2013)  
357 encode feedback signals about the velocity of the head in space ( $\Omega^k$ , Fig. 7, blue) and of the trunk in  
358 space ( $\Omega_{TS}^k$ , Fig. 7, gray), respectively. Furthermore, in line with experimental findings (Brooks and Cullen  
359 2013), these feedback pathways are silent during self-generated motion.

360 The Kalman filter makes further predictions that are entirely consistent with experimental results. First,  
361 it predicts that proprioceptive error signals during passive neck rotation encode velocity (Fig. 7 Suppl.  
362 3L; see Suppl. Methods, 'Feedback signals during neck movement'). Thus, the Kalman filter explains the  
363 striking result that the proprioceptive responses of bimodal neurons encode trunk *velocity* (Brooks and  
364 Cullen 2009; 2013), even if neck proprioceptors encode neck position. Note that neck proprioceptors



365 likely encode a mixture of neck position and velocity at high frequencies (Mergner et al. 1991).  
366 Additional simulations (not shown) where neck proprioceptive signals are assumed to encode mixtures  
367 of position and velocity yield similar results as those shown here. We used a model where neck  
368 proprioceptors encode position for simplicity, and in order to demonstrate that Kalman feedbacks  
369 encode trunk velocity even when proprioceptive signals encode position.

370 Second, the model predicts another important property of bimodal neurons: their response gains to  
371 both vestibular (during sinusoidal motion of the head and trunk together) and proprioceptive (during  
372 sinusoidal motion of the trunk when the head is stationary) stimulation vary identically if a constant  
373 rotation of the head relative to the trunk is added, as an offset, to the sinusoidal motion (Brooks and  
374 Cullen 2009). We propose that this offset head rotation extends or contracts individual neck muscles  
375 and affects the signal to noise ratio of neck proprioceptors. Indeed, simulations shown in Fig. 7 Suppl. 4  
376 reproduce the effect of head rotation offset on bimodal neurons. In agreement with experimental  
377 findings, we also find that simulated unimodal neurons are not affected by these offsets (Fig. 7 Suppl. 4).  
378 Finally, the model also predicts the dynamics of trunk and head rotation perception during long-duration  
379 rotations (Fig. 7 Suppl. 5), which has been established by behavioral studies (Mergner et al. 1991).

### 380 **Interactions between active and passive motion**

381 The theoretical framework of the Kalman filter asserts that the brain cancels predictable sensory inputs,  
382 leading to an attenuation of central vestibular responses, which presumably encode sensory errors or  
383 feedback gains, during active motion. An alternative explanation for the attenuation of central  
384 responses could be that the brain simply suppresses vestibular sensory inflow. Experimental evidence in  
385 favor of the Kalman filter framework comes from recordings performed when passive motion is applied  
386 concomitantly to an active movement (Brooks and Cullen 2013, 2014; Carriot et al. 2013). Indeed,  
387 neurons that respond during passive but not active motion have been found to encode the passive

388 component of combined passive and active motion, as expected based on the Kalman framework. We  
389 present corresponding simulation results in Fig. 8.

390 We simulate a rotation movement (Fig. 8A), where an active rotation ( $\Omega^u$ , Gaussian velocity profile) is  
391 combined to a passive rotation ( $\Omega^e$ , trapezoidal profile), a tilt movement (Fig. 8B; using similar velocity  
392 inputs,  $\Omega^u$  and  $\Omega^e$ , where the resulting active and passive tilt components are  $\int \Omega^u dt$  and  $\int \Omega^e dt$ ), and  
393 a translation movement (Fig. 8C). We find that, in all simulations, the final motion estimate (Fig. 8D-F;  $\hat{\Omega}$ ,  
394  $\hat{G}$  and  $\hat{A}$ , respectively) matches the combined active and passive motion ( $\Omega$ ,  $G$  and  $A$ , respectively). In  
395 contrast, the Kalman feedbacks (Fig. 8G-I) specifically encode the passive motion components.  
396 Specifically, the rotation feedback ( $\Omega^k$ , Fig. 8G) is identical to the passive rotation  $\Omega^e$  (Fig. 8A). As in Fig.  
397 5, the tilt feedback ( $G^k$ , Fig. 8H) encodes tilt velocity, also equal to  $\Omega^e$  (Fig. 8A). Finally, the linear  
398 acceleration feedback ( $A^k$ , Fig. 8I) follows the passive acceleration component, although it decreases  
399 slightly with time because of the somatogravic effect. Thus, Kalman filter simulations confirm that  
400 neurons that encode sensory mismatch or Kalman feedback should selectively follow the passive  
401 component of combined passive and active motion.

402 What would happen if the brain simply discarded vestibular sensory (or feedback) signals during active  
403 motion? We repeat these simulations after removing the vestibular sensory input signals from the  
404 Kalman filter. We find that the net motion estimates encode only the active movement components  
405 (Fig. 8J-L;  $\hat{\Omega}$ ,  $\hat{G}$  and  $\hat{A}$ ) – thus, not accurately estimating the true movement. Furthermore, as a result of  
406 the sensory signals being discarded, all sensory errors and Kalman feedbacks are null. These simulations  
407 indicate that suppressing vestibular signals during active motion would prevent the brain from detecting  
408 passive motion occurring during active movement (see Discussion, “Role of the vestibular system during  
409 active motion: ecological, clinical and fundamental implications.”), in contradiction with experimental  
410 results.

411

## Discussion

412 We have extended a well-established model where the brain processes vestibular information optimally  
413 using internal models (Laurens 2006; Laurens and Droulez, 2007; 2008; Laurens et al. 2010, 2011a;  
414 Laurens and Angelaki, 2011; Laurens et al. 2013a,b) by incorporating efference copies of motor  
415 commands during active motion. Previous studies (Gdowski et al. 2000; Gdowski and McCrea 1999;  
416 Marlinski and McCrea 2009; McCrea et al. 1999; McCrea and Luan 2003; Roy and Cullen 2001; 2004;  
417 Brooks and Cullen 2009, 2013, 2014; Brooks et al. 2015; Carriot et al. 2014) have suggested that the  
418 brain cancels vestibular reafference during active motion, but an actual quantitative model has never  
419 been presented. We have tested the hypothesis that this postulated cancellation mechanism uses  
420 exactly the same sensory internal model computations already discovered using passive motion stimuli  
421 (Mayne 1974; Oman 1982; Borah et al. 1988; Merfeld 1995; Zupan and Merfeld, 2002; Laurens 2006;  
422 Laurens and Droulez 2007, 2008; Laurens and Angelaki 2011; Karmali and Merfeld 2012; Lim et al. 2017).  
423 Presented simulations confirm the hypothesis that the *same* internal model (consisting of forward  
424 internal models of the canals, otoliths and neck proprioceptors) can reproduce behavioral and neuronal  
425 responses to *both* active and passive motion. The formalism of the Kalman filter allows predictions of  
426 internal variables during both active and passive motion, with a strong focus on sensory error and  
427 feedback signals, which we hypothesize are realized in the response patterns of central vestibular  
428 neurons.

429 Perhaps most importantly, this work resolves an apparent paradox between active and passive  
430 movements (Angelaki and Cullen, 2008), by placing them into a unified theoretical framework where a  
431 single internal model tracks head motion based on motor commands and sensory feedback signals. We  
432 have shown here that internal model computations, which have been extensively studied through  
433 decades of passive motion experiments, are equally required to process active motion signals. These

434 computational elements operate during both passive and active head movements, although particular  
435 cell types that encode sensory errors or feedback signals may not modulate during active movements  
436 because the corresponding sensory prediction error is negligible. This highlights the relevance and  
437 importance of passive motion stimuli, as critical experimental paradigms that can efficiently interrogate  
438 the network for establishing computational principles shared between active and passive movements,  
439 but which cannot easily be disentangled during active movements.

#### 440 **Summary of the Kalman filter model**

441 We have developed the first ever model that simulates self-motion estimates during both actively-  
442 generated and passive head movements. This model, summarized schematically in Fig. 9, transforms  
443 motor commands and Kalman filter feedback signals into internal estimates of head motion (rotation  
444 and translation) and predicted sensory signals. There are two important take-home messages: (1)  
445 Because of the physical properties of the two vestibular sense organs, the predicted motion generated  
446 from motor commands is not equal to predicted sensory signals (for example, the predicted rotation  
447 velocity is processed to account for canal dynamics in Fig. 4). Instead, the predicted rotation, tilt and  
448 translation signals generated by efference copies of motor commands must be processed by the  
449 corresponding forward models of the sensors in order to generate accurate sensory predictions. This  
450 important insight about the nature of these internal model computations has not been appreciated by  
451 the qualitative schematic diagrams of previous studies. (2) In an environment devoid of externally  
452 generated passive motion, motor errors and sensory noise, the resulting sensory predictions would  
453 always match sensory afferent signals accurately. In a realistic environment, however, unexpected head  
454 motion occurs due to both motor errors and external perturbations (see 'Role of the vestibular system  
455 during active motion: ecological, clinical and fundamental implications'). Sensory vestibular signals are  
456 then used to correct internal motion estimates through the computation of sensory errors and their

457 transformation into Kalman feedback signals. Given two sensory errors ( $\delta V$  originating from the  
458 semicircular canals and  $\delta F$  originating from the otoliths) and four internal state variables (rotation,  
459 internal canal dynamics, tilt and linear acceleration:  $\hat{\Omega}$ ,  $\hat{C}$ ,  $\hat{G}$ ,  $\hat{A}$ ), 8 feedback signals must be constructed.  
460 However, in practice, two of these signals have negligible influence for all movements ( $\delta V$  feedback to  $\hat{A}$   
461 and  $\delta F$  feedback to  $\hat{\Omega}$ ; see Table 2 and Suppl. Methods, ‘Kalman Feedback Gains’), thus only 6 elements  
462 are summarized in Fig. 9.

463 The non-negligible feedback signals originating from the canal error  $\delta V$  are as follows (Fig. 9, left):

- 464 • The feedback to the rotation estimate  $\hat{\Omega}$  represents the traditional “direct” vestibular pathway  
465 (Raphan et al. 1979, Laurens and Angelaki 2011). It is responsible for rotation perception during  
466 high-frequency (unexpected) vestibular stimulation, and has a gain close to unity.
- 467 • The feedback to  $\hat{C}$  feeds into the internal model of the canals, thus allowing compensation for  
468 canals dynamics. This pathway corresponds to the “velocity storage” (Raphan et al. 1979,  
469 Laurens and Angelaki 2011). Importantly, the contribution of this signal is significant for  
470 movements larger than  $\sim 1$ s, particularly during high velocity rotations.
- 471 • The feedback to tilt ( $\hat{G}$ ) converts canal errors into a tilt velocity ( $dG/dt$ ) signal, which is  
472 subsequently integrated by the internal model of head tilt.

473 The non-negligible feedback signals originating from the otolith error  $\delta F$  are as follows (Fig. 9, right):

- 474 • The feedback to linear acceleration ( $\hat{A}$ ) converts unexpected otolith activation into an  
475 acceleration signal, and is responsible for acceleration perception during passive translations (as  
476 well as experimentally generated otolith errors; Merfeld et al. 1999, Laurens et al. 2013a).
- 477 • The  $\delta F$  feedback to tilt ( $\hat{G}$ ) implements the somatogravic effect that acts to bias the internal  
478 estimate of gravity towards the net otolith signal so as to reduce the otolith error.

479 • The  $\delta F$  feedback to  $\hat{C}$  plays a similar role with the feedback to tilt  $\hat{G}$ , i.e. to reduce the otolith  
480 error; but acts indirectly by biasing the internal estimate of rotation in a direction which, after  
481 integration, drives the internal model of tilt so that it matches otolith signal (this feedback was  
482 called ‘velocity feedback’ in Laurens and Angelaki 2011). Behavioral studies (and model  
483 simulations) indicate that this phenomenon has low-frequency dynamics and results in the  
484 ability of otolith signals to estimate rotational velocity (Angelaki and Hess, 1996; Hess and  
485 Angelaki, 1993). Lesion studies have demonstrated that this feedback depends on an intact  
486 nodulus and ventral uvula, the vermal vestibulo-cerebellum (Angelaki and Hess, 1995a,b).

487 The model in Fig. 9 is entirely compatible with previous models based on optimal passive self-motion  
488 computations (Oman 1982; Borah et al. 1988; Merfeld 1995; Laurens 2006; Laurens and Droulez 2007,  
489 2008; Laurens and Angelaki 2011; Karmali and Merfeld 2012; Lim et al. 2017; Zupan and Merfeld, 2002).  
490 The present model is, however, distinct in two very important aspects: First, it takes into account active  
491 motor commands and integrates these commands with the vestibular sensory signals. Second, because  
492 it is formulated as a Kalman filter, it makes specific predictions about the feedback error signals, which  
493 constitute the most important nodes in understanding the neural computations underlying head motion  
494 sensation. Indeed, as will be summarized next, the properties of most cell types in the vestibular and  
495 cerebellar nuclei, as well as the vestibulo-cerebellum, appear to represent either sensory error or  
496 feedback signals.

497 ***Vestibular and rostral fastigial neurons encode sensory error or feedback signals during rotation and***  
498 ***translation***

499 Multiple studies have reported that vestibular-only (erroneous word to describe ‘non-eye-movement-  
500 sensitive’) neurons in the vestibular nuclei (VN) encode selectively passive head rotation (McCrea and  
501 Luan 2003; Roy and Cullen 2001; 2004; Brooks and Cullen 2014) or passive translation (Carriot et al.

502 2013), but suppress this activity during active head movements. In addition, a group of rostral fastigial  
503 nuclei (unimodal rFN neurons; Brooks and Cullen 2013; Brooks et al. 2015) also selectively encodes  
504 passive (but not active) rotations. These rotation-responding VN/rFN neurons likely encode either the  
505 semicircular canal error  $\delta V$  itself or its Kalman feedback to the rotation estimate (blue in Fig. 9, dashed  
506 and solid ovals 'VN, rFN', respectively). The translation-responding neurons likely encode either the  
507 otolith error  $\delta F$  or its feedback to the linear acceleration estimate (Fig. 9, solid and dashed red lines 'VN,  
508 trans PC'). Because error and feedback signals are proportional to each other in the experimental  
509 paradigms considered here, whether VN/rFN encode sensory errors or feedback signals cannot easily be  
510 distinguished using vestibular stimuli alone. Nevertheless, it is also important to emphasize that, while  
511 the large majority of VN and rFN neurons exhibit reduced responses during active head movements, this  
512 suppression is rarely complete (McRea et al. 1999; Roy and Cullen 2001; Brooks and Cullen 2013; Carriot  
513 et al. 2015). Thus, neuronal responses likely encode mixtures of error/feedback and sensory motion  
514 signals (e.g., such as those conveyed by direct afferent inputs).

515 During large amplitude passive rotations (Figure 4 Suppl. 3), the rotation estimate persists longer than  
516 the vestibular signal (Fig. 4, blue; a property called velocity storage). Because the internal estimate is  
517 equal to the canal error, this implies that vestibular nuclei neurons (that encode the canal error) should  
518 exhibit dynamics that are different from those of canal afferents, having incorporated velocity storage  
519 signals. This has indeed been demonstrated in VN neurons during optokinetic stimulation (Fig. 4 Suppl.  
520 1; Waespe and Henn 1977) and rotation about tilted axes (Fig. 6 Suppl. 3; Reisine and Raphan 1992).

### 521 ***Thalamus-projecting VN neurons possibly encode final motion estimates***

522 Based on the work summarized above, the final estimates of rotation (Fig. 4G) and translation (Fig. 6G),  
523 which are the desirable signals to drive perception, do not appear to be encoded by most VN/rFN cells.  
524 Thus, one may assume that they are reconstructed downstream, perhaps in thalamic (Marlinski and

525 McCrea, 2008; Meng et al., 2007; Meng and et al., 2010; but see Dale and Cullen 2016) or cortical areas.  
526 Interestingly, more than half (57%) of the VN cells projecting to the thalamus respond similarly during  
527 passive and actively-generated head rotations (Marlinski and McCrea, 2009). The authors emphasized  
528 that VN neurons with attenuated responses during actively-generated movements constitute only a  
529 small fraction (14%) of those projecting to the thalamus. Thus, although abundant in the VN, these  
530 passive motion-selective neurons may carry sensory error/feedback signals to the cerebellum, spinal  
531 cord or even other VN neurons (e.g., those coding the final estimates; Marlinski and McCrea, 2009). VN  
532 neurons identified physiologically to project to the cervical spinal cord do not to modulate during active  
533 rotations, so they could encode either passive head rotation or active and passive trunk rotation  
534 (McCrea et al., 1999). Thus, no firm conclusions can be drawn.

535 Furthermore, the dynamics of the thalamus-projecting VN neurons with similar responses to passive and  
536 active stimuli were not measured (Marlinski and McCrea, 2009). Recall that the model predicts that final  
537 estimates of rotation differ from canal afferent signals only in their response dynamics (Fig. 4, compare  
538 panels F and G). It would make functional sense that these VN neurons projecting to the thalamus follow  
539 the final estimate dynamics (i.e., they are characterized by a prolonged time constant compared to canal  
540 afferents) – and future experiments should investigate this hypothesis. Therefore, we would like to  
541 emphasize how efficient passive vestibular stimuli, even though those that may seem unnatural, are for  
542 computational insights and for understanding the functional properties of the neural network.

#### 543 ***Rostral fastigial neurons encoding passive trunk rotations***

544 Another class of rFN neurons (and possibly VN neurons projecting to the thalamus; Marlinski and  
545 McCrea, 2009, or those projecting to the spinal cord; McCrea et al., 1999) specifically encodes passive  
546 trunk velocity in space, independently of head velocity (bimodal neurons; Brooks and Cullen 2009, 2013,  
547 Brooks et al. 2015). These neurons likely encode Kalman feedback signals about trunk velocity (Fig. 7,



548 blue). Importantly, these neurons respond equivalently to passive whole trunk rotation when the trunk  
549 and the head rotate together (Fig. 7A) and to passive trunk rotation when the head is space-fixed (Fig.  
550 7C). The first protocol activates the semicircular canals and induces a canal error  $\delta V$ , while the later  
551 activates neck proprioceptors and generates a proprioceptive error,  $\delta P$ . From a physiological point of  
552 view, this indicates that bimodal neurons respond to semicircular canals as well as neck proprioceptors  
553 (hence their name).

554 The Kalman filter also predicts that neck proprioceptive signals that encode neck position should be  
555 transformed into error signals that encode neck velocity. In line with model predictions, bimodal  
556 neurons encode velocity signals that originate from neck proprioception during passive sinusoidal (1Hz,  
557 Brooks and Cullen 2009) and transient (Gaussian velocity profile, Brooks and Cullen 2013) movements.  
558 Remarkably, although short-duration rotation of the trunk while the head is stationary in space leads  
559 to a veridical perception of trunk rotation, long duration trunk rotation leads to an attenuation of the  
560 perceived trunk rotation and a growing illusion of head rotation in opposite direction (Mergner et al.,  
561 1991). These experimental findings are also predicted by the Kalman filter model (Fig. 7, Suppl. 5).

### 562 ***Purkinje cells in the vestibulo-cerebellum encode tilt and acceleration feedback***

563 The simple spike modulation of two distinct types of Purkinje cells in the caudal cerebellar vermis  
564 (lobules IX-X, Uvula and Nodulus) encodes tilt (tilt-selective cells) and translation (translation-selective  
565 cells) during three-dimensional motion (Yakusheva et al., 2007; 2008; 2013; Laurens et al. 2013a,b).  
566 Therefore, it is possible that tilt- and translation selective cells encode tilt and acceleration feedbacks  
567 (Fig. 9, green and red lines, respectively). If so, we hypothesize that their responses are suppressed  
568 during active motion (Fig. 5 and 6). How Purkinje cells modulate during active motion is currently  
569 unknown. However, one study (Lee et al. 2015) performed when rats learned to balance on a swing

570 indicates that Purkinje cell responses that encode trunk motion are reduced during predictable  
571 movements, consistent with the hypothesis that they encode sensory errors or Kalman feedback signals.  
572 Model simulations have also revealed that passive tilt doesn't induce any significant otolith error (Fig.  
573 5J). In contrast, passive tilt elicits a significant canal error (Fig. 5K). Thus, we hypothesize that the tilt  
574 signal present in the responses of Purkinje cells originates from the canal error  $\delta V$  onto the tilt internal  
575 state variable. If it is indeed a canal, rather than an otolith, error, it should be proportional to tilt velocity  
576 instead of tilt position (or linear acceleration). Accordingly, we observed (Laurens et al. 2013b) that tilt-  
577 selective Purkinje cell responses were on average close to velocity (average phase lag of  $36^\circ$  during  
578 sinusoidal tilt at 0.5Hz). However, since sinusoidal stimuli are not suited for establishing dynamics  
579 (Laurens et al., 2017), further experiments are needed to confirm that tilt-selective Purkinje cells indeed  
580 encode tilt velocity.

581 Model simulations have also revealed that passive translation, unlike passive tilt, should include an  
582 otolith error. This otolith error feeds also into the tilt internal variable (Fig. 9, somatogravic feedback)  
583 and is responsible for the illusion of tilt during sustained passive linear acceleration (somatogravic  
584 effect; Graybiel 1952). Therefore, as summarized in Fig. 9 (green lines), both canal and otolith errors  
585 should feedback onto the tilt internal variable. The canal error should drive modulation during tilt,  
586 whereas the otolith error should drive modulation during translation. In support of these predictions,  
587 we have demonstrated that tilt-selective Purkinje cells also modulate during translation, with a gain and  
588 phase consistent with the simulated otolith-driven feedback (Laurens et al 2013b). Thus, both of these  
589 feedback error signals might be carried by caudal vermis Purkinje cells – and future experiments should  
590 address these predictions.

591 Note that semicircular canal errors must be spatially transformed in order to produce an appropriate tilt  
592 feedback. Indeed, converting a rotation into head tilt requires taking into account the angle between the

593 rotation axis and earth-vertical. This transformation is represented by a bloc marked “3D” in Fig. 9 (see  
594 also (*eq. 9*) in Suppl. Methods, ‘Three-Dimensional Kalman filter’. Importantly, we have established  
595 (Laurens et al. 2013b) that tilt-selective Purkinje cells encode spatially transformed rotation signals, as  
596 predicted by theory. In fact, we have demonstrated that tilt-selective Purkinje cells do not simply  
597 modulate during vertical canal stimulation, but also carry the tilt signal during off-vertical axis yaw  
598 rotations (Laurens et al. 2013b).

599 In this respect, it is important to emphasize that truly tilt-selective neurons exclusively encode changes  
600 in orientation relative to gravity, rather than being generically activated by vertical canal inputs. Thus, it  
601 is critical that this distinction is experimentally made using three-dimensional motion (see Laurens et al.  
602 2013b, Laurens and Angelaki 2015). Whereas 3D rotations have indeed been used to identify tilt-  
603 selective Purkinje cells in the vermis (Laurens et al. 2013b; Yakusheva et al. 2007), this is not true for  
604 other studies. For example, Laurens and Angelaki (2015) and Zhou et al. (2006) have reported tilt-  
605 modulated cells in the rFN and VN, respectively, but because these neurons were not tested in three  
606 dimensions, the signals carried by these neurons remain unclear.

#### 607 **Further notes on tilt-selective Purkinje cells**

608 As summarized above, the simple spike responses of tilt-selective Purkinje cells during passive motion  
609 have already revealed many details of the internal model computations. Thus, we have proposed that  
610 tilt-selective Purkinje cells encode the feedback signals about tilt, which includes scaled and processed  
611 (i.e. by a spatial transformation, green “3D” box in Fig. 9) versions of both canal and otolith sensory  
612 errors (Fig. 9, green oval, ‘tilt PC?’). However, there could be alternative implementations of the Kalman  
613 filter, where tilt-selective Purkinje cells may not encode only feedback signals. Next, we propose an  
614 alternative formulation regarding the signal they convey and the underlying organization of predictive  
615 and feedback pathways.

616 We note that motor commands  $\Omega^u$  must be also be spatially processed (black “3D” box in Fig. 9) to  
617 contribute to the tilt prediction. One may question whether two distinct neuronal networks transform  
618 motor commands and canal errors independently (resulting in two “3D” boxes in Fig. 9). An alternative  
619 (Fig. 9 Suppl. 1) would be that the brain merges motor commands and canal error to produce a final  
620 rotation estimate prior to performing this transformation. From a mathematical point of view, this  
621 alternative would only require a re-arrangement of the Kalman filter equations, which would not alter  
622 any of the model’s conclusions. However, tilt-selective Purkinje cells, which encode a spatially  
623 transformed signal, would then carry a mixture of predictive and feedback signals and would therefore  
624 respond identically to active and passive tilt velocity. Therefore, the brain may perform a spatial  
625 transformation of predictive and feedback rotation signals independently; or may merge them before  
626 transforming them. Recordings from tilt-selective Purkinje cells during active movements will  
627 distinguish between these alternatives.

### 628 ***Summary of the neural implementation of sensory error and feedback signals***

629 In summary, many of the response properties described by previous studies for vestibular nuclei and  
630 cerebellar neurons can be assigned a functional ‘location’ within the Kalman filter model. Interestingly,  
631 most of the central neurons fit well with the properties of sensory errors and/or feedback signals. That  
632 an extensive neural machinery has been devoted to feedback signals is not surprising, given their  
633 functional importance for self-motion estimation. For many of these signals, a distinction between  
634 sensory errors and feedbacks is not easily made. That is, rotation-selective VN and rFN neurons can  
635 encode either canal error (Fig. 9, bottom, dashed blue oval) or rotation feedback (Fig. 9, bottom, solid  
636 blue oval). Similarly, translation-selective VN, rFN and Purkinje cells can encode either otolith error (Fig.  
637 9, bottom, dashed red oval) or translation feedback (Fig. 9, bottom, solid red oval). The only feedback  
638 that is easily distinguished based on currently available data is the tilt feedback (Fig. 9, green lines).

639 Although the blue, green and red feedback components of Fig. 9 can be assigned to specific cell groups,  
640 this is not the case with the cyan feedback components. First, note that, like the tilt variable (but unlike  
641 the rotation and translation variables, which receive significant feedback contributions from either only  
642 the canal or only the otolith errors, respectively), the canal internal model variable, receives non-  
643 negligible feedback contributions from both the canal and otolith sensory errors (Fig. 9, cyan lines). The  
644 canal feedback error changes the time constant of the rotation estimate (Fig. 4 and Fig. 4, Suppl. 1 and  
645 3), whereas the otolith feedback error may suppress (post-rotatory tilt) or create a rotation estimate  
646 (Fig. 6, Suppl. 3). The neuronal implementation of the internal model of the canals ( $\hat{C}$ ), and of its  
647 associated feedback pathways, are currently unknown. However, lesion studies clearly indicate that the  
648 caudal cerebellar vermis, lobules X and IX might influence the canal internal model state variable  
649 (Angelaki and Hess 1995a,b; Wearne et al., 1998). In fact, it is possible that the simple-spike output of  
650 the translation-selective Purkinje cells also carries the otolith sensory error feedback to the canal  
651 internal model state variable (Fig. 9, bottom, cyan arrow passing through the dashed red ellipse).  
652 Similarly, the canal error feedback to the canal internal model state variable (Fig. 9, bottom, cyan arrow  
653 originating from the dashed blue ellipse) can originate from VN or rFN cells that selectively encode  
654 passive, not active, head rotation (Fig. 4J, note that the  $C^k$  feedback is but a scaled-down version of the  
655  $\Omega^k$  feedback).

656 Thus, although the feedback error signals to the canal internal model variable can be linked to known  
657 neural correlates, cells coding for the state variable  $\hat{C}$  exclusively have not been identified. It is possible  
658 that the representation of the hidden variable  $\hat{C}$  may be coded in a distributed fashion. After all, as  
659 already stated above, VN and rFN neurons have also been shown to carry mixed signals - they can  
660 respond to both rotation and translation, as well as they may carry both feedback/error and actual  
661 sensory signals. Thus, it is important to emphasize that these Kalman variables and error signals may be  
662 represented in a multiplexed way, where single neurons manifest mixed selectivity to more than just

663 one internal state and/or feedback signals. This appears to be an organizational principle both in central  
664 vestibular areas (Laurens et al., 2017) and throughout the brain (Rigotti et al., 2013, Fusi et al., 2016). It  
665 has been proposed that mixed selectivity has an important computational advantage: high-dimensional  
666 representations with mixed selectivity allow a simple linear readout to generate a diverse array of  
667 potential responses (Fusi et al., 2016). In contrast, representations based on highly specialized neurons  
668 are low dimensional and may preclude a linear readout from generating several responses that depend  
669 on multiple task-relevant variables.

### 670 **Interruption of internal model computations during proprioceptive mismatch**

671 In this treatment, we have considered primarily the importance of the internal model of the sensors to  
672 emphasize its necessity for both self-generated motor commands and unpredicted, external  
673 perturbations. It is important to also point out that self-generated movements also utilize an internal  
674 model of the motor plant which is modeled by a matrix  $M$  (as well as internal dynamics modeled by  
675 matrix  $D$ ) in Fig. 1. In fact, it is this motor internal model that has been studied and shown to be altered  
676 in experiments where resistive torques are applied to the head (Brooks et al., 2015; Brooks and Cullen,  
677 2015; Cullen and Brooks, 2015) or active movements are entirely blocked (Roy and Cullen, 2001; 2004;  
678 Carriot et al. 2013). Under these conditions, central neurons were shown to encode net head motion  
679 (i.e. active and passive indiscriminately) with a similar gain as during passive motion. This indicates that  
680 the brain ceases to subtract predicted sensory signals from afferent inputs whenever head motion is  
681 perturbed or, in other words, ceases to use an internal model of the motor plant when this model  
682 appears to be incorrect. This result may be reproduced by the Kalman filter by switching off the internal  
683 model of the motor plant (i.e. setting the matrix  $M$  to zero) when active movements are perturbed (Fig.  
684 7 Suppl. 6C). Note that the mechanism that operates this switch is not included in the Kalman filter  
685 framework in Fig. 1.

686 Roy and Cullen (2004) have shown that this process is triggered by proprioceptive mismatch: Perturbing  
687 neck or body motion induces a discrepancy between the intended head position and proprioceptive  
688 feedback. Note that perturbing head motion also induces a vestibular mismatch since it causes the head  
689 velocity in space to differ from the motor plan. However, vestibular mismatch, which also occurs when  
690 passive rotations are superimposed to active movements, don't interrupt internal model computations,  
691 as shown experimentally by (Brooks and Cullen 2013, 2014; Carriot et al. 2013) and illustrated in the  
692 model predictions of Fig. 8.

693 Therefore, proprioceptive mismatch is likely a specific indication that the internal model of the motor  
694 plant (matrix  $M$  in Fig. 1) is inaccurate. Instead of using an inaccurate model, the brain stops using it  
695 altogether until an accurate model is learned (Brooks et al., 2015; Brooks and Cullen, 2015; Cullen and  
696 Brooks, 2015). Note that the computation that detects proprioceptive mismatch may occur separately  
697 from the Kalman filter.

#### 698 **Relation to previous three-dimensional models and Bayesian Inference**

699 For simplicity, we have presented a linearized one-dimensional model in this study. Three-dimensional  
700 Kalman filter models can also be constructed (Borah et al. 1988; Lim et al. 2017), and we show in Suppl.  
701 Methods, 'Three-dimensional Kalman filter', how to generalize the model to three dimensions.  
702 However, to simplify the main framework and associated predictions, we presented the result of a  
703 simpler one-dimensional model.

704 The passive motion components of the model presented here is to a large extent identical to the Particle  
705 filter Bayesian model in (Laurens 2006, Laurens and Droulez 2007; 2008; Laurens and Angelaki 2011),  
706 which we have re-implemented as a Kalman filter, and into which we incorporated motor commands.  
707 One fundamental aspect of previous Bayesian models (Laurens 2006; Laurens and Droulez 2007; 2008) is  
708 the explicit use of two Bayesian priors that prevent sensory noise from accumulating over time. These

709 priors encode the natural statistics of externally generated motion or motion resulting from motor  
710 errors and unexpected perturbations. Because, on average, rotation velocities and linear accelerations  
711 are close to zero, these Bayesian priors are responsible for the decrease of rotation estimates during  
712 sustained rotation (Fig. 4 Suppl. 2) and for the somatogravic effect (Fig. 6 Suppl. 2) (see Laurens and  
713 Angelaki 2011 for further explanations). The influence of the priors is higher when the statistical  
714 distributions of externally generated rotation ( $\Omega^\varepsilon$ ) and acceleration ( $A^\varepsilon$ ) is narrower (Fig. 9 Suppl. 2), i.e.  
715 when their standard deviation is smaller. Stronger priors reduce the gain and time constant of rotation  
716 and acceleration estimates (Fig. 9 Suppl. 2). Importantly, the Kalman filter model predicts that the priors  
717 affect only the passive, but not the active, self-motion final estimates. Indeed, the rotation and  
718 acceleration estimates last indefinitely during simulated active motion (Fig. 4 Suppl. 2, Fig. 6 Suppl. 2). In  
719 this respect, the Kalman filter explains why the vestibulo-ocular reflex is reduced in figure ice skaters  
720 (Tanguy et al. 2008; Alpini et al. 2009): The range of head velocities experienced in these activities is  
721 wider than normal. In previous Bayesian models, we found that that widening the rotation prior should  
722 increase the time constant of vestibular responses, apparently in contradiction with these results.  
723 However, these models didn't consider the difference between active and passive stimuli. The  
724 formalism of the Kalman filter reveals that Bayesian priors should reflect the distribution of passive  
725 motion or motor errors. In athletes that are highly trained to perform stereotypic movements, this  
726 distribution likely narrows, resulting in stronger priors and reduced vestibular responses.

## 727 **Role of the vestibular system during active motion: ecological, clinical and fundamental implications**

728 Neuronal recordings (Brooks and Cullen 2013,2014; Carriot et al. 2013) and the present modeling  
729 unambiguously demonstrate that central neurons respond to unexpected motion during active  
730 movement (a result that we reproduced in Fig. 8G-I). Beyond experimental manipulations, a number of  
731 processes may cause unpredictable motion to occur in natural environments. When walking on tree



732 branches, boulders or soft grounds, the support surface may move under the feet, leading to  
733 unexpected trunk motion. A more dramatic example of unexpected trunk motion, that requires  
734 immediate correction, occurs when slipping or tripping. Complex locomotor activities involve a variety of  
735 correction mechanism among which spinal mechanisms and vestibular feedback play preeminent roles  
736 (Keshner et al. 1987; Black et al. 1988; Horstmann and Dietz 1988).

737 The contribution of the vestibular system for stabilizing posture is readily demonstrated by considering  
738 the impact of chronic bilateral vestibular deficits. While most patients retain an ability to walk on firm  
739 ground and even perform some sports (Crawford 1964; Herdman 1996), vestibular deficit leads to an  
740 increased incidence of falls (Herdman et al. 2000), difficulties in walking on uneven terrains and deficits  
741 in postural responses to perturbations (Keshner et al. 1987; Black et al. 1988; Riley 2010). This confirms  
742 that vestibular signals are important during active motion, especially in challenging environments. In this  
743 respect, the Kalman filter framework appears particularly well suited for understanding the effect of  
744 vestibular lesions.

745 Vestibular sensory errors also occur when the internal model of the motor apparatus is incorrect  
746 (Brooks and Cullen 2015) and these errors can lead to recalibration of this internal model. This suggests  
747 that vestibular error signals during self-generated motion may play two fundamental roles: (1) updating  
748 self-motion estimates and driving postural or motor corrections, and (2) providing teaching signals to  
749 internal models of motor control (Wolpert et al 1995) and therefore facilitating motor learning.

750 But perhaps most importantly, the model presented here should eliminate the misinterpretation that  
751 vestibular signals are ignored during self-generated motion – and that passive motion stimuli are old-  
752 fashioned and should no longer be used in experiments. Regarding the former conclusion, the presented  
753 simulations highlight the role of the internal models of canal dynamics and otolith ambiguity, which  
754 operate continuously to generate the *correct sensory prediction* during *both* active and passive

755 movements. Without these internal models, the brain would be unable to correctly predict sensory  
756 canal and otolith signals and everyday active movements would lead to sensory mismatch (e.g., for  
757 rotations, see Fig. 4 Suppl. 2 and 3). Thus, even though particular nodes (neurons) in the circuit show  
758 attenuated or no modulation during active head rotations, vestibular processing remains the same - the  
759 internal model is both engaged and critically important for accurate self-motion estimation, even during  
760 actively-generated head movements. Regarding the latter conclusion, it is important to emphasize that  
761 passive motion stimuli have been, and continue to be, extremely valuable in revealing salient  
762 computations that would have been amiss if the brain's intricate wisdom was interrogated only with  
763 self-generated movements.

#### 764 **Conclusion**

765 “A good model has a delightful way of building connections between phenomena that never would have  
766 occurred to one” (Robinson, 1977). Four decades later, this beautifully applies here, where the mere act  
767 of considering how the brain should process self-generated motion signals in terms of mathematical  
768 equations (instead of schematic diagrams) immediately revealed a striking similarity with models of  
769 passive motion processing and, by motivating this work, opened an avenue to resolve a standing  
770 paradox in the field.

771 The framework of the internal model hypothesis, and the series of quantitative models it has spawned,  
772 have explained and simulated behavioral and neuronal responses to a long list of passive motion  
773 paradigms, and with a spectacular degree of accuracy (Merfeld 1995; Merfeld et al. 1999; Angelaki et al.  
774 2004; Laurens et al. 2010,2011a; Laurens et al. 2013a,b; Lim et al. 2017). The present study offers the  
775 theoretical framework which will likely assist in understanding neuronal computations that are essential  
776 to active self-motion perception, balance and locomotor activity in everyday life.

777

778

## Methods

### 779 Structure of a Kalman filter

780 In a Kalman filter (Kalman 1960), state variables  $X$  are driven by their own dynamics (matrix  $D$ ), motor  
781 commands  $X^u$  and internal or external perturbations  $X^\varepsilon$  through the equation (Fig. 1A):

$$782 \quad X(t) = D.X(t - 1) + M.X^u(t) + E.X^\varepsilon$$

783 A set of sensors, grouped in a variable  $S$ , measures state variables or combinations thereof (encoded in  
784 a matrix  $T$ ), and are modeled as:

$$785 \quad S(t) = T.X(t) + S^\eta(t),$$

786 where  $S^\eta$  is Gaussian sensory noise. The model assumes that the brain has an exact knowledge of the  
787 forward model, i.e. of  $D$ ,  $M$ ,  $E$  and  $T$  as well as the variances of  $X^\varepsilon$  and  $S^\eta$ . Furthermore, the brain  
788 knows the values of the motor inputs  $X^u$  and sensory signals  $S$ , but doesn't have access to the actual  
789 values of  $X^\varepsilon$  and  $S^\eta$ .

790 At each time  $t$ , the Kalman filter computes a preliminary estimate (also called a prediction)  $\hat{X}^p(t) =$   
791  $D.\hat{X}(t - 1) + M.X^u(t)$  and a corresponding predicted sensory signal  $\hat{S}^p = T.\hat{X}^p$  (Fig. 1B). This  
792 prediction  $\hat{S}^p$  and the sensory input  $S$  are compared to compute a sensory error  $\delta S$ . Sensory errors are  
793 then transformed into a feedback  $X^k = K.\delta S$  where  $K$  is a matrix of feedback gains. Thus, an improved  
794 estimate at time  $t$  is  $\hat{X}(t) = \hat{X}^p(t) + K.\delta S(t)$ . The value of the feedback gain matrix  $K$  determines how  
795 sensory errors (and therefore sensory signals) are used to compute the final estimate  $\hat{X}$ , and is  
796 computed based on  $D$ ,  $E$ ,  $T$  and on the variances of  $X^\varepsilon$  and  $S^\eta$  (see Suppl. Methods, 'Kalman filter  
797 algorithm').

798 In the case of the self-motion model, the motor commands  $\Omega^u$  and  $A^u$  are inputs to the Kalman filter  
799 (Fig. 2). Note that, while the motor system may actually control other variables (such as forces or  
800 accelerations), we consider that these variables are converted into  $\Omega^u$  and  $A^u$ . We demonstrate in  
801 Suppl. Methods, 'Model of motor commands' that altering these assumptions does not alter our  
802 conclusions. In addition to motor commands, a variety of internal or external factors such as external  
803 (passive) motion also affect  $\Omega$  and  $A$ . The total rotation and acceleration components resulting from  
804 these factors are modeled as variables  $\Omega^\varepsilon$  and  $A^\varepsilon$ . Similar to (Laurens 2006, Laurens and Droulez 2007,  
805 2008) we modeled the statistical distribution of these variables as Gaussians, with standard deviations  
806  $\sigma_\Omega$  and  $\sigma_A$ .

807 Excluding vision and proprioception, the brain senses head motion through the semicircular canals (that  
808 generate a signal  $V$ ) and the otoliths organs (that generate a signal  $F$ ). Thus, in initial simulations (Fig. 3-  
809 6), the variable  $S$  encompasses  $V$  and  $F$  (neck proprioceptors are added in Fig. 7).

810 The semicircular canals are rotation sensors that, due to their mechanical properties, exhibit high-pass  
811 filter properties. These dynamics may be neglected for rapid movements of small amplitude (such as Fig.  
812 3) but can have significant impact during natural movements (Fig. 4 Suppl. 3). They are modeled using a  
813 hidden state variable  $C$ . The canals are also subject to sensory noise  $V^\eta$ . Taken both the noise and the  
814 dynamics into account, the canals signal is modeled as  $V = \Omega - C + V^\eta$ .

815 The otolith organs are acceleration sensors. They exhibit negligible temporal dynamics in the range of  
816 motion considered here, but are fundamentally ambiguous: they sense gravitational as well as linear  
817 acceleration – a fundamental ambiguity resulting from Einstein's equivalence principle (Einstein 1907).  
818 Gravitational acceleration along the inter-aural axis depends on head roll position, modeled here as  
819  $G = \int \Omega . dt$ . The otoliths encode the sum of  $A$  and  $G$  and is also affected by sensory noise  $F^\eta$ , such that  
820 the net otolith signal is  $F = A + G + F^\eta$ .

821 How sensory errors are used to correct motion estimates depends on the Kalman gain matrix, which is  
822 computed by the Kalman algorithm such that the Kalman filter as a whole performs optimal estimation.  
823 In theory, the Kalman filter includes a total of 8 feedback signals, corresponding to the combination of 2  
824 sensory errors (canal and otolith errors) and 4 internal states (see Suppl. Methods, 'Kalman feedback  
825 gains').

826 It is important to emphasize that the Kalman filter model is closely related to previous models of  
827 vestibular information processing. Indeed, simulations of long-duration rotation and visuo-vestibular  
828 interactions (Fig. 4 Suppl. 2), as well as mathematical analysis (Laurens 2006), demonstrate that  $\hat{C}$  is  
829 equivalent to the "velocity storage" (Raphan et al. 1979, Laurens and Angelaki 2011). These low-  
830 frequency dynamics, as well as visuo-vestibular interactions, were previously simulated and interpreted  
831 in the light of optimal estimation theory; and accordingly are reproduced by the Kalman filter model.

832 The model presented here is to a large extent identical to the Particle filter Bayesian model in (Laurens  
833 2006, Laurens and Droulez 2007; 2008; Laurens and Angelaki 2011). It should be emphasized that: (1)  
834 transforming the model into a Kalman filter didn't alter the assumptions upon which the Particle filter  
835 was build; (2) introducing motor commands into the Kalman filter was a textbook process that did not  
836 require any additional assumptions or parameters; and (3) we used exactly the same parameter values  
837 as in Laurens (2006) and Laurens and Droulez (2008) (with the exception of  $\sigma_F$  whose impact, however,  
838 is negligible, and of the model of head on trunk rotation that required additional parameters; see next  
839 section).

840 Beyond the question of active and passive motion, these previous models and other Kalman filter  
841 models have been used to demonstrate how optimal inference performed by the Kalman filter improves  
842 the accuracy of self-motion estimates, in particular by preventing the accumulation of estimation errors  
843 (MacNeilage et al. 2008; Laurens and Angelaki 2011) and reducing sensory perception thresholds (Lim et

844 al. 2017). We have also demonstrated that the Bayesian approach accounts for the effects of  
845 semicircular canal lesions (Laurens and Droulez, 2008).

#### 846 **Simulation parameters**

847 The parameters of the Kalman filter model are directly adapted from previous studies (Laurens 2006;  
848 Laurens and Droulez 2008). Tilt angles are expressed in radians, rotation velocities in rad/s, and  
849 accelerations in  $g$  ( $1 g = 9.81 \text{ m/s}^2$ ). Note that a small tilt angle  $\alpha$  (in radians) result in a gravitational  
850 acceleration  $\sin(\alpha) \approx \alpha$  (in  $g$ ). For this reason, tilt and linear acceleration variables are expressed in  
851 equivalent units, and may be added or subtracted. The standard deviations of the unpredictable  
852 rotations ( $\Omega^\varepsilon$ ) and accelerations ( $A^\varepsilon$ ) are set to the standard deviations of the Bayesian a priori in  
853 Laurens 2006 and Laurens and Droulez 2008, i.e.  $\sigma_\Omega = 0.7 \text{ rad/s}$  ( $\Omega^\varepsilon$ ) and  $\sigma_A = 0.3 g$  ( $A^\varepsilon$ ). The standard  
854 deviation of the noise affecting the canals ( $V^\eta$ ) was set to  $\sigma_V = 0.175 \text{ rad/s}$  (as in Laurens 2006 and  
855 Laurens and Droulez 2008). The standard deviation of the otolith noise ( $F^\eta$ ) was set to  $\sigma_F = 0.002 g$  ( $2$   
856  $\text{cm/s}^2$ ). We verified that values ranging from 0 to  $0.01 g$  had no effect on simulation results. The time  
857 constant of the canals was set to  $\tau_c = 4\text{s}$ . Simulations used a time step of  $\delta t = 0.01\text{s}$ . We verified that  
858 changing the value of the time step without altering other parameters had no effect on the results.

859 We ran simulations using a variant of the model that included visual information encoding rotation  
860 velocity. The visual velocity signals were affected by sensory noise with a standard deviation  $\sigma_{V_{IS}} = 0.12$   
861 rad/s, as in (Laurens and Droulez 2008).

862 Another variant modeled trunk in space velocity ( $\Omega_{TS}$ ) and head on trunk velocity ( $\Omega_{HT}$ ) independently.  
863 The standard deviations of unpredictable rotations were set to  $\sigma_{TS} = 0.7 \text{ rad/s}$  (identical to  $\sigma_\Omega$ ) and  $\sigma_{HT}$   
864  $= 3.5 \text{ rad/s}$ . The standard deviation of sensory noise affecting neck afferents was set to  $\sigma_P = 0.0017 \text{ rad}$ .

865 For simplicity, all simulations were run without adding the sensory noise  $V^\eta$  and  $F^\eta$ . These noise-free  
866 simulations are representative of the results that would be obtained by averaging several simulation  
867 runs performed with sensory noise (e.g. as in Laurens and Droulez 2007). We chose to present noise-  
868 free results here in order to facilitate the comparison between simulations of active and passive motion.

869

## References

870 Alpini, D., Botta, M., Mattei, V., & Tornese, D. (2009). Figure ice skating induces vestibulo-ocular  
871 adaptation specific to required athletic skills. *Sport Sciences for Health*, 5(3), 129-134.

872 Angelaki, D. E., & Hess, B. J. (1995a). Lesion of the nodulus and ventral uvula abolish steady-state off-  
873 vertical axis otolith response. *Journal of Neurophysiology*, 73(4), 1716-1720.

874 Angelaki, D. E., & Hess, B. J. (1995b). Inertial representation of angular motion in the vestibular system  
875 of rhesus monkeys. II. Otolith-controlled transformation that depends on an intact cerebellar nodulus.  
876 *Journal of Neurophysiology*, 73(5), 1729-1751.

877 Angelaki, D. E., & Hess, B. J. (1996). Three-dimensional organization of otolith-ocular reflexes in rhesus  
878 monkeys. II. Inertial detection of angular velocity. *Journal of neurophysiology*, 75(6), 2425-2440.

879 Angelaki, D. E., Shaikh, A. G., Green, A. M., & Dickman, J. D. (2004). Neurons compute internal models of  
880 the physical laws of motion. *Nature*, 430(6999), 560-564.

881 Angelaki, D. E., & Cullen, K. E. (2008). Vestibular system: the many facets of a multimodal sense. *Annu.*  
882 *Rev. Neurosci.*, 31, 125-150.

883 Brandt, T., Büchele, W., & Arnold, F. (1977). Arthrokinetic nystagmus and ego-motion sensation.  
884 *Experimental Brain Research*, 30(2-3), 331-338.

885 Bertolini, G., Ramat, S., Laurens, J., Bockisch, C. J., Marti, S., Straumann, D., & Palla, A. (2011). Velocity  
886 storage contribution to vestibular self-motion perception in healthy human subjects. *Journal of*  
887 *neurophysiology*, 105(1), 209-223.

888 Black, F. O., Shupert, C. L., Horak, F. B., & Nashner, L. M. (1988). Abnormal postural control associated  
889 with peripheral vestibular disorders. *Progress in brain research*, 76, 263-275.



- 890 Borah, J., Young, L. R., & Curry, R. E. (1988). Optimal estimator model for human spatial orientation.  
891 *Annals of the New York Academy of Sciences*, 545(1), 51-73.
- 892 Brooks, J. X., & Cullen, K. E. (2009). Multimodal integration in rostral fastigial nucleus provides an  
893 estimate of trunk movement. *Journal of Neuroscience*, 29(34), 10499-10511.
- 894 Brooks, J. X., & Cullen, K. E. (2013). The primate cerebellum selectively encodes unexpected self-motion.  
895 *Current Biology*, 23(11), 947-955.
- 896 Brooks, J. X., & Cullen, K. E. (2014). Early vestibular processing does not discriminate active from passive  
897 self-motion if there is a discrepancy between predicted and actual proprioceptive feedback. *Journal of*  
898 *neurophysiology*, 111(12), 2465-2478.
- 899 Brooks, J. X., Carriot, J., & Cullen, K. E. (2015). Learning to expect the unexpected: rapid updating in  
900 primate cerebellum during voluntary self-motion. *Nature neuroscience*, 18(9), 1310-1317.
- 901 Carriot, J., Brooks, J. X., & Cullen, K. E. (2013). Multimodal integration of self-motion cues in the  
902 vestibular system: active versus passive translations. *Journal of neuroscience*, 33(50), 19555-19566.
- 903 Crawford, J. (1964). Living without a balancing mechanism. *The British journal of ophthalmology*, 48(7),  
904 357.
- 905 Cullen, K. E., & Minor, L. B. (2002). Semicircular canal afferents similarly encode active and passive head-  
906 on-trunk rotations: implications for the role of vestibular efference. *J Neurosci*, 22(11), RC226.
- 907 Cullen, K. E. (2012). The vestibular system: multimodal integration and encoding of self-motion for  
908 motor control. *Trends in neurosciences*, 35(3), 185-196.

- 909 Cullen, K. E., Brooks, J. X., Jamali, M., Carriot, J., & Massot, C. (2011). Internal models of self-motion:  
910 computations that suppress vestibular reafference in early vestibular processing. *Experimental brain*  
911 *research*, 210(3-4), 377-388.
- 912 Dale, A. & Cullen, K.E. (2016) Sensory coding in the vestibular thalamus discriminates passive from active  
913 self-motion. Program No. 181.10/JJJ22, Neuroscience Meeting Planner. Society for Neuroscience  
914 Meeting, San Diego.
- 915 Fusi, S., Miller, E. K., & Rigotti, M. (2016). Why neurons mix: high dimensionality for higher cognition.  
916 *Current opinion in neurobiology*, 37, 66-74.
- 917 Gdowski, G. T., & McCrea, R. A. (1999). Integration of vestibular and head movement signals in the  
918 vestibular nuclei during whole-trunk rotation. *Journal of neurophysiology*, 82(1), 436-449.
- 919 Gdowski, G. T., Boyle, R., & McCrea, R. A. (2000). Sensory processing in the vestibular nuclei during  
920 active head movements. *Archives italiennes de biologie*, 138(1), 15-28.
- 921 Graybiel, A. (1952). Oculogravic illusion. *AMA archives of ophthalmology*, 48(5), 605-615.
- 922 Herdman, S. (1996) Vestibular Rehabilitation. In Baloh, R. W., & Halmagyi, G. M. (Eds.), Disorders of the  
923 vestibular system. Oxford University Press, USA, 583-597.
- 924 Herdman, S. J., Blatt, P., Schubert, M. C., & Tusa, R. J. (2000). Falls in patients with vestibular deficits.  
925 *Otology & Neurotology*, 21(6), 847-851.
- 926 Hess, B. J. M., & Angelaki, D. E. (1993). Angular velocity detection by head movements orthogonal to the  
927 plane of rotation. *Experimental brain research*, 95(1), 77-83.
- 928 Horstmann, G. A., & Dietz, V. (1988). The contribution of vestibular input to the stabilization of human  
929 posture: a new experimental approach. *Neuroscience letters*, 95(1), 179-184.

- 930 Jamali, M., Sadeghi, S. G., & Cullen, K. E. (2009). Response of vestibular nerve afferents innervating  
931 utricle and saccule during passive and active translations. *Journal of neurophysiology*, *101*(1), 141-149.
- 932 Kalman, R. E. (1960). A new approach to linear filtering and prediction problems. *Journal of basic*  
933 *Engineering*, *82*(1), 35-45.
- 934 Karmali, F., & Merfeld, D. M. (2012). A distributed, dynamic, parallel computational model: the role of  
935 noise in velocity storage. *Journal of Neurophysiology*, *108*(2), 390-405.
- 936 Kennedy, A., Wayne, G., Kaifosh, P., Alviña, K., Abbott, L. F., & Sawtell, N. B. (2014). A temporal basis for  
937 predicting the sensory consequences of motor commands in an electric fish. *Nature neuroscience*, *17*(3),  
938 416-422.
- 939 Keshner, E. A., Allum, J. H. J., & Pfaltz, C. R. (1987). Postural coactivation and adaptation in the sway  
940 stabilizing responses of normals and patients with bilateral vestibular deficit. *Experimental Brain*  
941 *Research*, *69*(1), 77-92.
- 942 Laurens, J. (2006). Modélisation Bayésienne des interactions visuo-vestibulaires (Doctoral dissertation,  
943 Paris 6).
- 944 Laurens, J., & Droulez, J. (2007). Bayesian processing of vestibular information. *Biological cybernetics*,  
945 *96*(4), 389-404.
- 946 Laurens, J., & Droulez, J. (2008). Bayesian modelling of visuo-vestibular interactions. In *Probabilistic*  
947 *reasoning and decision making in sensory-motor systems* (pp. 279-300). Springer Berlin Heidelberg.
- 948 Laurens, J., Straumann, D., & Hess, B. J. (2010). Processing of angular motion and gravity information  
949 through an internal model. *Journal of neurophysiology*, *104*(3), 1370-1381.

- 950 Laurens, J., Strauman, D., & Hess, B. J. (2011a). Spinning versus wobbling: how the brain solves a  
951 geometry problem. *Journal of Neuroscience*, 31(22), 8093-8101.
- 952 Laurens, J., Valko, Y., & Straumann, D. (2011b). Experimental parameter estimation of a visuo-vestibular  
953 interaction model in humans. *Journal of Vestibular Research*, 21(5), 251-266.
- 954 Laurens, J., & Angelaki, D. E. (2011). The functional significance of velocity storage and its dependence  
955 on gravity. *Experimental brain research*, 210(3-4), 407-422.
- 956 Laurens, J., Meng, H., & Angelaki, D. E. (2013a). Computation of linear acceleration through an internal  
957 model in the macaque cerebellum. *Nature neuroscience*, 16(11), 1701-1708.
- 958 Laurens, J., Meng, H., & Angelaki, D. E. (2013b). Neural representation of orientation relative to gravity  
959 in the macaque cerebellum. *Neuron*, 80(6), 1508-1518.
- 960 Laurens, J., & Angelaki, D. E. (2015). How the Vestibulocerebellum Builds an Internal Model of Self-  
961 motion. *The Neuronal Codes of the Cerebellum*, 97.
- 962 Laurens, J., Liu, S., Yu, X. J., Chan, R., Dickman, D., DeAngelis, G. C., & Angelaki, D. E. (2017).  
963 Transformation of spatiotemporal dynamics in the macaque vestibular system from otolith afferents to  
964 cortex. *eLife*, 6, e20787.
- 965 Lee, R. X., Huang, J. J., Huang, C., Tsai, M. L., & Yen, C. T. (2015). Plasticity of cerebellar Purkinje cells in  
966 behavioral training of trunk balance control. *Frontiers in systems neuroscience*, 9.
- 967 Lim, K., Karmali, F., Nicoucar, K., & Merfeld, D. M. (2017). Perceptual precision of passive trunk tilt is  
968 consistent with statistically optimal cue integration. *Journal of Neurophysiology*, jn-00073.

969 Mackrous, I., Carriot, J., Jamali, M., Brooks, J., & Cullen, K.E. (2016) Selective encoding of unexpected  
970 head tilt by the central neurons takes into account the cerebellar computation output . Program No.  
971 718.04/QQ2, Neuroscience Meeting Planner. Society for Neuroscience Meeting, San Diego.

972 MacNeilage, P. R., Ganesan, N., & Angelaki, D. E. (2008). Computational approaches to spatial  
973 orientation: from transfer functions to dynamic Bayesian inference. *Journal of neurophysiology*, 100(6),  
974 2981-2996.

975 Marlinski, V., & McCrea, R. A. (2008). Coding of self-motion signals in ventro-posterior thalamus neurons  
976 in the alert squirrel monkey. *Experimental brain research*, 189(4), 463.

977 Marlinski, V., & McCrea, R. A. (2009). Self-motion signals in vestibular nuclei neurons projecting to the  
978 thalamus in the alert squirrel monkey. *Journal of neurophysiology*, 101(4), 1730-1741.

979 Mayne, R. (1974). A systems concept of the vestibular organs. In *Vestibular system part 2:*  
980 *psychophysics, applied aspects and general interpretations* (pp. 493-580). Springer Berlin Heidelberg.

981 McCrea, R. A., Gdowski, G. T., Boyle, R., & Belton, T. (1999). Firing behavior of vestibular neurons during  
982 active and passive head movements: vestibulo-spinal and other non-eye-movement related neurons.  
983 *Journal of neurophysiology*, 82(1), 416-428.

984 McCrea, R. A., & Luan, H. (2003). Signal processing of semicircular canal and otolith signals in the  
985 vestibular nuclei during passive and active head movements. *Annals of the New York Academy of*  
986 *Sciences*, 1004(1), 169-182.

987 Meng, H., May, P. J., Dickman, J. D., & Angelaki, D. E. (2007). Vestibular signals in primate thalamus:  
988 properties and origins. *Journal of Neuroscience*, 27(50), 13590-13602.

- 989 Meng, H., & Angelaki, D. E. (2010). Responses of ventral posterior thalamus neurons to three-  
990 dimensional vestibular and optic flow stimulation. *Journal of neurophysiology*, 103(2), 817-826.
- 991 Merfeld, D. M. (1995). Modeling the vestibulo-ocular reflex of the squirrel monkey during eccentric  
992 rotation and roll tilt. *Experimental Brain Research*, 106(1), 123-134.
- 993 Merfeld, D. M., Zupan, L., & Peterka, R. J. (1999). Humans use internal models to estimate gravity and  
994 linear acceleration. *Nature*, 398(6728), 615-618.
- 995 Mergner, T., Siebold, C., Schweigart, G., & Becker, W. (1991). Human perception of horizontal trunk and  
996 head rotation in space during vestibular and neck stimulation. *Experimental Brain Research*, 85(2), 389-  
997 404.
- 998 Oman, C. M. (1982). A heuristic mathematical model for the dynamics of sensory conflict and motion  
999 sickness. *Acta Oto-Laryngologica*, 94(sup392), 4-44.
- 1000 Paige, G. D., & Seidman, S. H. (1999). Characteristics of the VOR in response to linear acceleration.  
1001 *Annals of the New York Academy of Sciences*, 871(1), 123-135.
- 1002 Raphan, T., Matsuo, V., & Cohen, B. (1979). Velocity storage in the vestibulo-ocular reflex arc (VOR).  
1003 *Experimental Brain Research*, 35(2), 229-248.
- 1004 Reisine, H., & Raphan, T. (1992). Neural basis for eye velocity generation in the vestibular nuclei of alert  
1005 monkeys during off-vertical axis rotation. *Experimental brain research*, 92(2), 209-226.
- 1006 Requarth, T., & Sawtell, N. B. (2011). Neural mechanisms for filtering self-generated sensory signals in  
1007 cerebellum-like circuits. *Current opinion in neurobiology*, 21(4), 602-608.
- 1008 Rigotti, M., Barak, O., Warden, M. R., Wang, X. J., Daw, N. D., Miller, E. K., & Fusi, S. (2013). The  
1009 importance of mixed selectivity in complex cognitive tasks. *Nature*, 497(7451), 585-590.

- 1010 Riley, N. H. (2010). Neuromuscular adaptations during perturbations in individuals with and without  
1011 bilateral vestibular loss. (Doctoral dissertation, University of Iowa)
- 1012 Robinson, D. A. (1977). Vestibular and optokinetic symbiosis: an example of explaining by modelling.  
1013 Control of gaze by brain stem neurons. Elsevier, Amsterdam, 49-58.
- 1014 Roy, J. E., & Cullen, K. E. (2001). Selective processing of vestibular reafference during self-generated  
1015 head motion. *Journal of Neuroscience*, 21(6), 2131-2142.
- 1016 Roy, J. E., & Cullen, K. E. (2004). Dissociating self-generated from passively applied head motion: neural  
1017 mechanisms in the vestibular nuclei. *Journal of Neuroscience*, 24(9), 2102-2111.
- 1018 Sadeghi, Soroush G., Lloyd B. Minor, and Kathleen E. Cullen. "Response of vestibular-nerve afferents to  
1019 active and passive rotations under normal conditions and after unilateral labyrinthectomy." *Journal of*  
1020 *neurophysiology* 97.2 (2007): 1503-1514.
- 1021 Shaikh, A. G., Ghasia, F. F., Dickman, J. D., & Angelaki, D. E. (2005). Properties of cerebellar fastigial  
1022 neurons during translation, rotation, and eye movements. *Journal of neurophysiology*, 93(2), 853-863.
- 1023 Shadmehr, R., Smith, M. A., & Krakauer, J. W. (2010). Error correction, sensory prediction, and  
1024 adaptation in motor control. *Annual review of neuroscience*, 33, 89-108.
- 1025 Tanguy, S., Quarck, G., Etard, O., Gauthier, A., & Denise, P. (2008). Vestibulo-ocular reflex and motion  
1026 sickness in figure skaters. *European journal of applied physiology*, 104(6), 1031.
- 1027 Tseng, Y. W., Diedrichsen, J., Krakauer, J. W., Shadmehr, R., & Bastian, A. J. (2007). Sensory prediction  
1028 errors drive cerebellum-dependent adaptation of reaching. *Journal of neurophysiology*, 98(1), 54-62.
- 1029 Waespe, W., & Henn, V. (1977). Neuronal activity in the vestibular nuclei of the alert monkey during  
1030 vestibular and optokinetic stimulation. *Experimental Brain Research*, 27(5), 523-538.

- 1031 Waespe, W., Cohen, B., & Raphan, T. (1983). Role of the flocculus and paraflocculus in optokinetic  
1032 nystagmus and visual-vestibular interactions: effects of lesions. *Experimental Brain Research*, 50(1), 9-  
1033 33.
- 1034 Wearne, S., Raphan, T., & Cohen, B. (1998). Control of spatial orientation of the angular vestibuloocular  
1035 reflex by the nodulus and uvula. *Journal of neurophysiology*, 79(5), 2690-2715.
- 1036 Wolpert, D. M., Ghahramani, Z., & Jordan, M. I. (1995). An internal model for sensorimotor integration.  
1037 *Science*, 269(5232), 1880.
- 1038 Yakusheva, T. A., Shaikh, A. G., Green, A. M., Blazquez, P. M., Dickman, J. D., & Angelaki, D. E. (2007).  
1039 Purkinje cells in posterior cerebellar vermis encode motion in an inertial reference frame. *Neuron*, 54(6),  
1040 973-985.
- 1041 Yakusheva, T., Blazquez, P. M., & Angelaki, D. E. (2008). Frequency-selective coding of translation and tilt  
1042 in macaque cerebellar nodulus and uvula. *Journal of Neuroscience*, 28(40), 9997-10009.
- 1043 Yakusheva, T. A., Blazquez, P. M., Chen, A., & Angelaki, D. E. (2013). Spatiotemporal properties of optic  
1044 flow and vestibular tuning in the cerebellar nodulus and uvula. *Journal of Neuroscience*, 33(38), 15145-  
1045 15160.
- 1046 Zupan, L. H., Merfeld, D. M., & Darlot, C. (2002). Using sensory weighting to model the influence of  
1047 canal, otolith and visual cues on spatial orientation and eye movements. *Biological cybernetics*, 86(3),  
1048 209-230.
- 1049
- 1050
- 1051



|      |                  |                                                                                                      |
|------|------------------|------------------------------------------------------------------------------------------------------|
| 1052 |                  | <i>Motion variables</i>                                                                              |
| 1053 | <hr/>            |                                                                                                      |
| 1054 | $\Omega$         | <i>Head rotation velocity (in space)</i>                                                             |
| 1055 | $G$              | <i>Head Tilt</i>                                                                                     |
| 1056 | $A$              | <i>Linear Acceleration</i>                                                                           |
| 1057 | $C$              | <i>Canals dynamics</i>                                                                               |
| 1058 | $\Omega_{TS}$    | <i>Trunk in space rotation velocity (variant of the model)</i>                                       |
| 1059 | $\Omega_{HT}$    | <i>Head on trunk rotation velocity (variant of the model)</i>                                        |
| 1060 | $N$              | <i>Neck position (variant of the model)</i>                                                          |
| 1061 | $X$              | <i>Matrix containing all motion variables in a model</i>                                             |
| 1062 |                  |                                                                                                      |
| 1063 |                  | <i>Sensory variables</i>                                                                             |
| 1064 | <hr/>            |                                                                                                      |
| 1065 | $V$              | <i>Semicircular canal signal</i>                                                                     |
| 1066 | $F$              | <i>Otolith signal</i>                                                                                |
| 1067 | $P$              | <i>Neck proprioceptive signal</i>                                                                    |
| 1068 | $Vis$            | <i>Visual rotation signal</i>                                                                        |
| 1069 | $S$              | <i>Matrix containing all sensory variables in a model</i>                                            |
| 1070 |                  |                                                                                                      |
| 1071 |                  | <i>Accent and superscripts (motion variables)</i>                                                    |
| 1072 | <hr/>            |                                                                                                      |
| 1073 | $X$              | <i>Real value of a variable</i>                                                                      |
| 1074 | $\hat{X}$        | <i>Final estimate</i>                                                                                |
| 1075 | $\hat{X}^p$      | <i>Predicted (or preliminary) estimate</i>                                                           |
| 1076 | $X^u$            | <i>Motor command affecting the variable</i>                                                          |
| 1077 | $X^\varepsilon$  | <i>Perturbation or motor error affecting the variable (standard deviation <math>\sigma_X</math>)</i> |
| 1078 | $\sigma_X$       | <i>Standard deviation of <math>X^\varepsilon</math></i>                                              |
| 1079 | $X^k$            | <i>Kalman feedback on the variable</i>                                                               |
| 1080 |                  |                                                                                                      |
| 1081 |                  | <i>Accent and superscripts (sensory variables)</i>                                                   |
| 1082 | <hr/>            |                                                                                                      |
| 1083 | $S$              | <i>Real value of a variable</i>                                                                      |
| 1084 | $\hat{S}^p$      | <i>Predicted value</i>                                                                               |
| 1085 | $S^\eta$         | <i>Sensory noise</i>                                                                                 |
| 1086 | $\sigma_S$       | <i>Standard deviation of <math>S^\eta</math></i>                                                     |
| 1087 | $\delta S$       | <i>Sensory error</i>                                                                                 |
| 1088 | $k_{\delta S}^X$ | <i>Kalman gain of the feedback from <math>S</math> to a motion variable <math>X</math></i>           |
| 1089 |                  |                                                                                                      |
| 1090 |                  | <i>Other</i>                                                                                         |
| 1091 | <hr/>            |                                                                                                      |
| 1092 | $\delta t$       | <i>Time step used in the simulations</i>                                                             |
| 1093 | $M'$             | <i>Transposed of a matrix <math>M</math></i>                                                         |
| 1094 | $\tau_c$         | <i>Time constant of the semicircular canals</i>                                                      |

1095 **Table 1: List of motion variables and mathematical notations**

|                   |                  | Gains during EVAR                 | Gains during tilt                 | Notes                       |
|-------------------|------------------|-----------------------------------|-----------------------------------|-----------------------------|
| Canal feedbacks   | $k_{\delta V}^N$ | <b>0.94</b>                       | <b>0.94</b>                       |                             |
|                   | $k_{\delta V}^C$ | <b>0.19 <math>\delta t</math></b> | <b>0.23 <math>\delta t</math></b> | <i>Integrated over time</i> |
|                   | $k_{\delta V}^G$ | 0.00                              | <b>0.90 <math>\delta t</math></b> | <i>Negligible</i>           |
|                   | $k_{\delta V}^A$ | 0.00                              | -0.90 $\delta t$                  | <i>Negligible</i>           |
| Otolith feedbacks | $k_{\delta F}^N$ | -                                 | 0.00                              | <i>Negligible</i>           |
|                   | $k_{\delta F}^C$ | -                                 | <b>0.14 <math>\delta t</math></b> | <i>Integrated over time</i> |
|                   | $k_{\delta F}^G$ | -                                 | <b>0.76 <math>\delta t</math></b> | <i>Integrated over time</i> |
|                   | $k_{\delta F}^A$ | -                                 | <b>0.99</b>                       |                             |

1096  
 1097 **Table 2: Kalman feedback gains during EVAR and tilt/translation.** Some feedback gains are constant  
 1098 independently of  $\delta t$  while some other scale with  $\delta t$  (see Suppl. Methods, ‘Feedback gains’ for  
 1099 explanations). Gains that have negligible impact on the motion estimates are indicated in normal fonts,  
 1100 others with profound influence are indicated in bold. The feedback gains transform error signals into  
 1101 feedback signals.

|                          |                              | Gains                              | Notes                       |
|--------------------------|------------------------------|------------------------------------|-----------------------------|
| Canal feedbacks          | $k_{\delta V}^{\Omega_{TS}}$ | <b>0.85</b>                        |                             |
|                          | $k_{\delta V}^{\Omega_{HT}}$ | <b>0.10</b>                        |                             |
|                          | $k_{\delta V}^N$             | 0.05 $\delta t$                    | <i>Negligible</i>           |
|                          | $k_{\delta V}^C$             | <b>0.22 <math>\delta t</math></b>  | <i>Integrated over time</i> |
|                          | $k_{\delta V}^{\Omega}$      | <b>0.95</b>                        |                             |
| Proprioceptive feedbacks | $k_{\delta P}^{\Omega_{TS}}$ | <b>-0.84/<math>\delta t</math></b> |                             |
|                          | $k_{\delta P}^{\Omega_{HT}}$ | <b>0.89/<math>\delta t</math></b>  |                             |
|                          | $k_{\delta P}^N$             | <b>0.94</b>                        |                             |
|                          | $k_{\delta P}^C$             | 0.03                               | <i>Negligible</i>           |
|                          | $k_{\delta P}^{\Omega}$      | 0.05/ $\delta t$                   | <i>Negligible</i>           |

1102

1103 **Table 3: Kalman feedback gains during head and neck rotation.** As in Table 2, some feedback gains are  
 1104 constant and independently of  $\delta t$ , while some others scale with or inversely to  $\delta t$  (see Suppl. Methods,  
 1105 “Feedback gains of the model of head and neck motion” for explanations). Gains that have negligible  
 1106 impact on the motion estimates are indicated in normal fonts, others with profound influence are  
 1107 indicated in bold. The feedback gains  $k_{\delta V}^{\Omega}$  and  $k_{\delta P}^{\Omega}$  are computed as  $k_{\delta V}^{\Omega} = k_{\delta V}^{\Omega_{TS}} + k_{\delta V}^{\Omega_{HT}}$  and  $k_{\delta P}^{\Omega} =$   
 1108  $k_{\delta P}^{\Omega_{TS}} + k_{\delta P}^{\Omega_{HT}}$ .

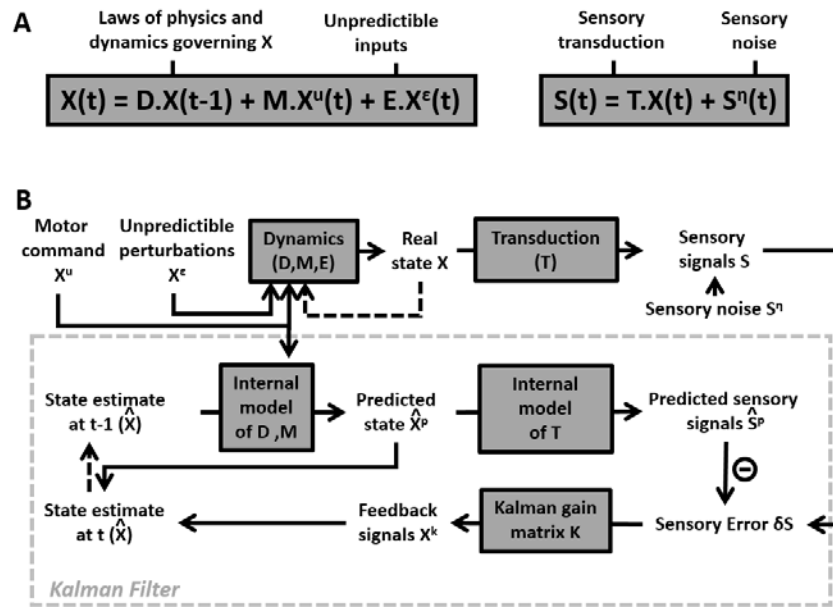

1109

1110 **Figure 1: Generic structure of a Kalman Filter.** (A) Equations of the Kalman filter algorithm describing  
 1111 how motor commands and sensory signals are processed for optimal state estimation. Motion variables  
 1112 ( $X$ ) are computed as a function of motor commands  $X^u$  and unpredictable perturbations  $X^\epsilon$ . Matrices  
 1113  $D$ ,  $M$ ,  $E$  and  $T$  encode the system's dynamics. Sensory inputs  $S$  are computed as a function of  $X$  and  
 1114 sensory noise,  $S^\eta$ . (B) Schematic implementing the equations of the Kalman filter algorithm. An internal  
 1115 estimate of motion variables (internal states,  $\hat{X}(t)$ ) is computed dynamically as a function of  $\hat{X}(t-1)$ ,  
 1116 motor commands  $X^u(t)$  and sensory signals  $S(t)$ . The dashed arrows indicate that the estimate at time  
 1117  $t$  is passed to the next time step, where it becomes the estimate at  $(t-1)$ . Sensory errors  $\delta S$  are  
 1118 transformed into feedback  $X^k = K \cdot \delta S$ , where  $K$  is a matrix of feedback gains, whose rank is determined  
 1119 by the dimensionality of both the state variable  $X$  and the sensory signals  $S$ . The box defined by dashed  
 1120 gray lines illustrates the Kalman filter computations.

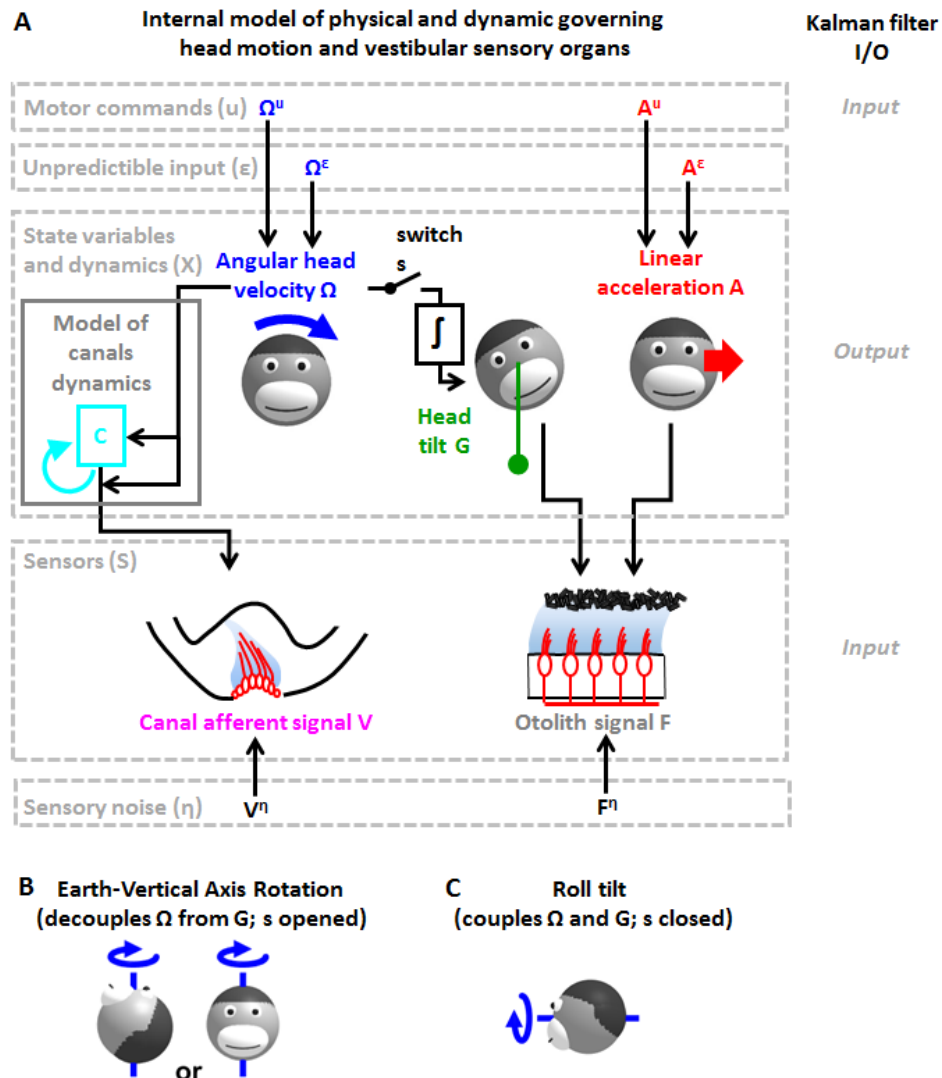

1121

1122 **Figure 2: Application of the Kalman filter algorithm into optimal self-motion estimation using an**  
 1123 **internal model with four state variables and two vestibular sensors.** (A) Schematic diagram of the  
 1124 model. Inputs to the model include motor commands, unexpected perturbations, as well as sensory  
 1125 signals. Motor commands during active movements, that is angular velocity ( $\Omega^u$ ) and translational  
 1126 acceleration ( $A^u$ ), are known by the brain. Unpredicted internal or external factors such as external  
 1127 (passive) motion are modeled as variables  $\Omega^\epsilon$  and  $A^\epsilon$ . The state variable has 4 degrees of freedom:  
 1128 angular velocity  $\Omega$ , tilt position  $G$ , linear acceleration  $A$  and a hidden variable  $C$  used to model the  
 1129 dynamics of the semicircular canals (see Methods). Two sensory signals are considered: semicircular  
 1130 canals (rotation sensors that generate a signal  $V$ ) and the otoliths organs (linear acceleration sensors  
 1131 that generate a signal  $F$ ). Sensory noise  $V^\eta$  and  $F^\eta$  is illustrated here, but omitted from all simulations  
 1132 for simplicity. (B, C) illustration of rotations around earth-vertical (B) and earth-horizontal (C) axes.

1133

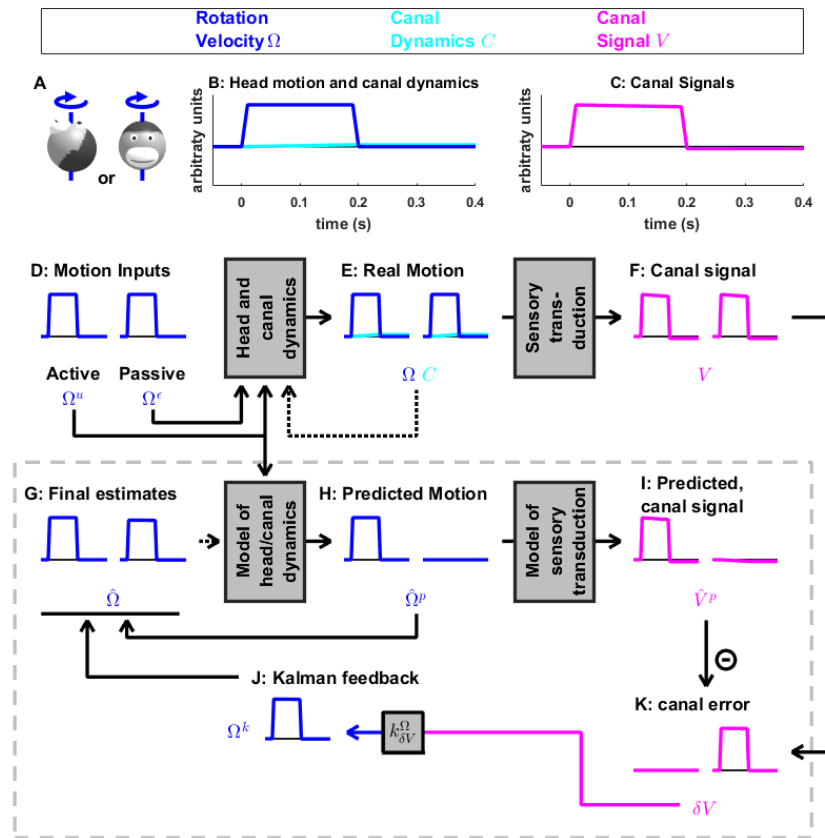

1134

1135 **Figure 3: Short duration rotation around an earth-vertical axis (as in Fig. 2B).** (A) Illustration of the  
 1136 stimulus lasting 200 ms. (B,C) Time course of motion variables and sensory (canal) signals. (D-K)  
 1137 Simulated variables during active (left panels) and passive motion (right panels). Only the angular  
 1138 velocity state variable  $\Omega$  is shown (tilt position  $G$  and linear acceleration  $A$  are not considered in this  
 1139 simulation, and the hidden variable  $C$  is equal to zero). Continuous arrows represent the flow of  
 1140 information during one time step, and broken arrows the transfer of information from one time step to  
 1141 the next. (J) Kalman feedback. For clarity, the Kalman feedback is shown during passive motion only (it is  
 1142 always zero during active movements in the absence of any perturbation and noise). The box defined by  
 1143 dashed gray lines illustrates the Kalman filter computations. For the rest of mathematical notations, see  
 1144 Table 1.

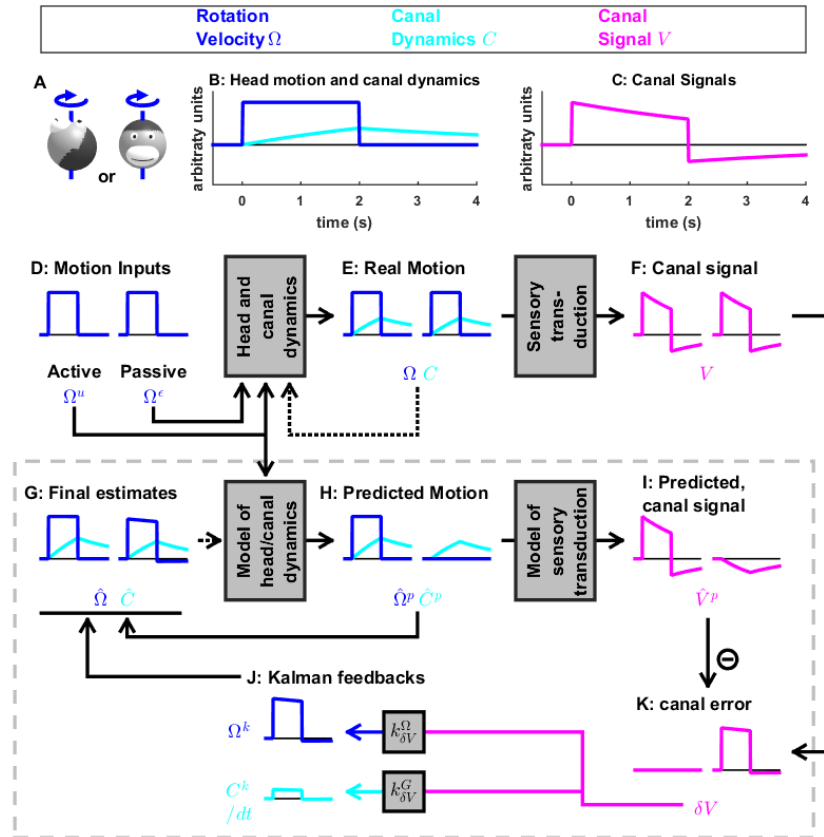

1145

1146 **Figure 4: Medium-duration rotation around an earth-vertical axis, demonstrating the role of the**  
 1147 **internal model of canal dynamics.** (A) Illustration of the stimulus lasting 2 s. (B,C) Time course of motion  
 1148 variables and sensory (canal) signals. (D-K) Simulated variables during active (left panels) and passive  
 1149 motion (right panels). Two state variables are shown: the angular velocity  $\Omega$  (blue) and canal dynamics  $C$   
 1150 (cyan). Continuous arrows represent the flow of information during one time step, and broken arrows  
 1151 the transfer of information from one time step to the next. (J) Kalman feedback. For clarity, the Kalman  
 1152 feedback (reflecting feedback from the canal error signal to the two state variables) is shown during  
 1153 passive motion only (it is always zero during active movements in the absence of any perturbation and  
 1154 noise). All simulations use a canal time constant of 4s. Note that, because of the integration, the  
 1155 illustrated feedback  $C^k$  is scaled by a factor  $1/\delta t$ ; see Suppl. Methods, 'Kalman feedback gains'. The box  
 1156 defined by dashed gray lines illustrates the Kalman filter computations. For the rest of mathematical  
 1157 notations, see Table 1.

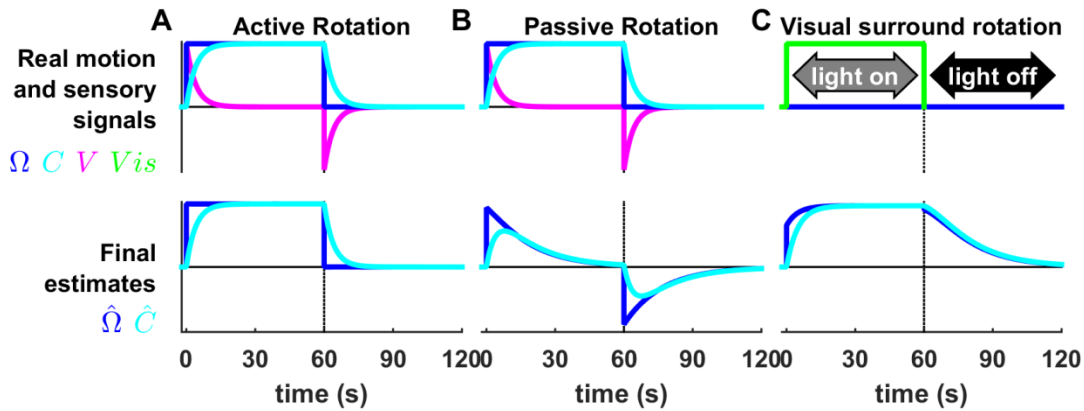

1158

1159 **Figure 4 Supplement 1. Processing of rotation information during long-duration motion. (A,B)**

1160 Simulation of constant velocity rotation lasting 60s, followed by 60s where the head doesn't rotate (top

1161 row,  $\Omega$ , blue). The semicircular canal signal (top row,  $V$ , magenta) decreases exponentially (time

1162 constant=4s) during the rotation ( $V = \Omega - C$ ;  $C$  represented by cyan lines). The deceleration at  $t=60s$

1163 induces a canal after-effect. During active rotation (A), the final estimates of rotation velocity ( $\hat{\Omega}$  lower

1164 row, blue) and canal dynamics ( $\hat{C}$ , lower row, cyan) are identical to their real respective values (A, top

1165 panel). In contrast, during passive rotation (B), the final estimate of rotation differs from the stimulus:  $\hat{\Omega}$

1166 decreases exponentially towards zero, although the decrease is slower (time constant = 16.5s) than that

1167 of the canals. This prolonged estimate arises from the contribution of the internal state variable  $\hat{C}$ ,

1168 which rises at the beginning of rotation as in (A) but reaches a maximum and decreases towards zero.

1169 (C) Simulation of optokinetic stimulation, i.e., a visual stimulus rotating at constant velocity ( $Vis$ , top

1170 row, green) while the head is immobile. The rotation estimate  $\hat{\Omega}$  rises immediately to 70% of stimulus

1171 velocity at the beginning of the stimulation, and then increases exponentially to 96% of stimulus

1172 velocity.  $\hat{C}$  rises exponentially to the stimulation velocity but doesn't exhibit an immediate increase at

1173 the beginning of the stimulation. Both  $\hat{\Omega}$  and  $\hat{C}$  persist at the end of the rotation.

1174 The simulated results in B and C match the perceptual (Bertolini et al. 2011) and reflex (Raphan et al.

1175 1979) responses to these stimuli. Previous work (Raphan et al. 1979; Laurens and Angelaki 2011) used

1176 an intermediate variable called 'velocity storage' to model low frequency responses to vestibular and

1177 visual stimulation. The state variable  $\hat{C}$  in the Kalman filter model is identical to the velocity storage. An

1178 optimal model based on particle filtering also produced identical results (Laurens and Droulez 2007,

1179 2008).



1180 The Kalman filter also predicts that rotation perception should last indefinitely during active constant-  
1181 velocity rotation (A), unlike passive rotation (B). Note however that sustained rotation perception during  
1182 active rotation is also accomplished by the velocity storage ( $\hat{C}$ ), which likely saturates at velocities of  
1183  $\sim 20\text{-}30^\circ/\text{s}$  in humans (Laurens et al. 2011b). Therefore, actively rotating at substantially higher velocities  
1184 may lead to disorientation and vertigo (as commonly experienced by children and waltz dancers). Note  
1185 that all Kalman filter simulations do not include this saturation.

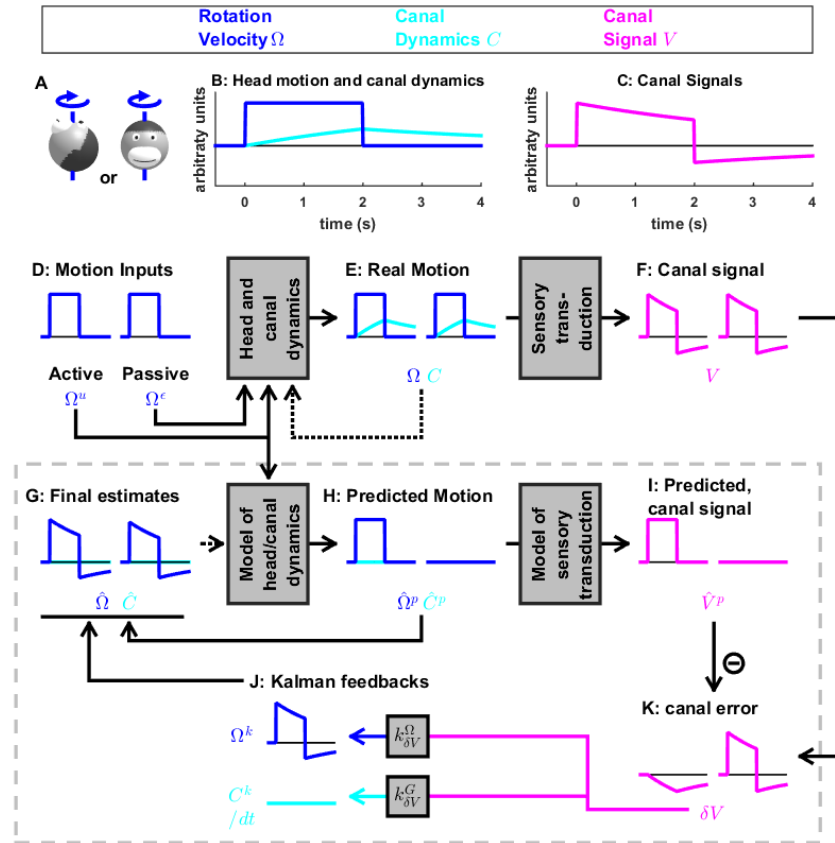

1186

1187 **Figure 4 Supplement 2: Same simulation as in Fig. 4, where the internal model of canals dynamic is not**  
 1188 **used. Note error in the final estimate of rotation (G) during both active and passive movements.**

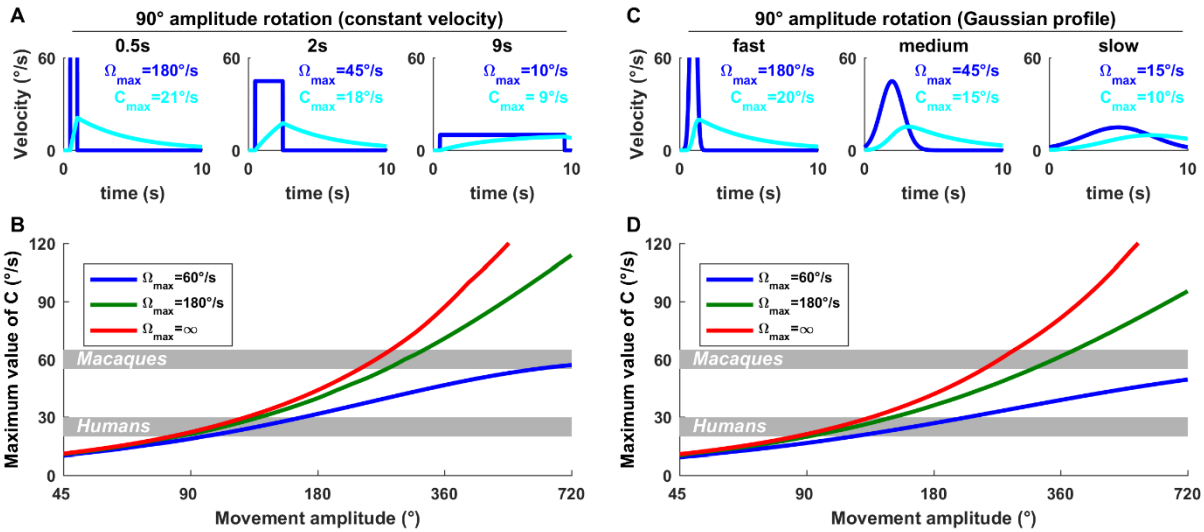

1189

1190 **Figure 4 Supplement 3: Quantitative analysis of the importance of an internal model of the canals for**  
 1191 **ecological movements.** The internal variable  $C$ , which represents an internal model of the canals, has  
 1192 low-pass dynamics. Nevertheless, its importance is highest for high velocities. To illustrate this, here we  
 1193 simulate  $C$  during either (A,B) constant velocity or (C,D) Gaussian-velocity rotations of various  
 1194 amplitudes and durations. (A,C) Rotations with an amplitude of  $90^\circ$  and duration of 0.5, 2 and 9s (i.e.  
 1195 rotations at 180, 45 and  $10^\circ/\text{s}$ , respectively). We find that the peak value of  $C$  is  $21^\circ/\text{s}$  during a fast  
 1196 movement (0.5s) whereas it is only  $9^\circ/\text{s}$  during a slow movement (9s). Therefore, for a given movement  
 1197 amplitude, the internal model contribution is larger at larger velocities. (B,D) Maximum value of  $C$  as a  
 1198 function of movement amplitude for slow ( $60^\circ/\text{s}$ ) and rapid ( $180^\circ/\text{s}$ , and infinite velocity) movements.  
 1199 During fast movements,  $C$  may exceed  $20^\circ/\text{s}$  during  $90^\circ$  rotation and  $40^\circ/\text{s}$  during  $180^\circ$  rotation. We  
 1200 note that the velocity storage likely saturates at  $\sim 20\text{-}30^\circ/\text{s}$  in humans (Laurens et al. 2011b) and  $\sim 60^\circ/\text{s}$   
 1201 in macaques (Waespe et al. 1983) (shown in B and D as gray bands). (this saturation is not included in  
 1202 the Kalman filter). For fast rotations ( $180^\circ/\text{s}$ ), the saturation would be reached for rotations of  $130^\circ$  in  
 1203 humans (assuming a saturation velocity of  $30^\circ/\text{s}$ ) and  $290^\circ$  in macaques. These simulations demonstrate  
 1204 that the role of the velocity storage in compensating for canal dynamics is not restricted to long-  
 1205 duration rotations but encompasses natural movements.

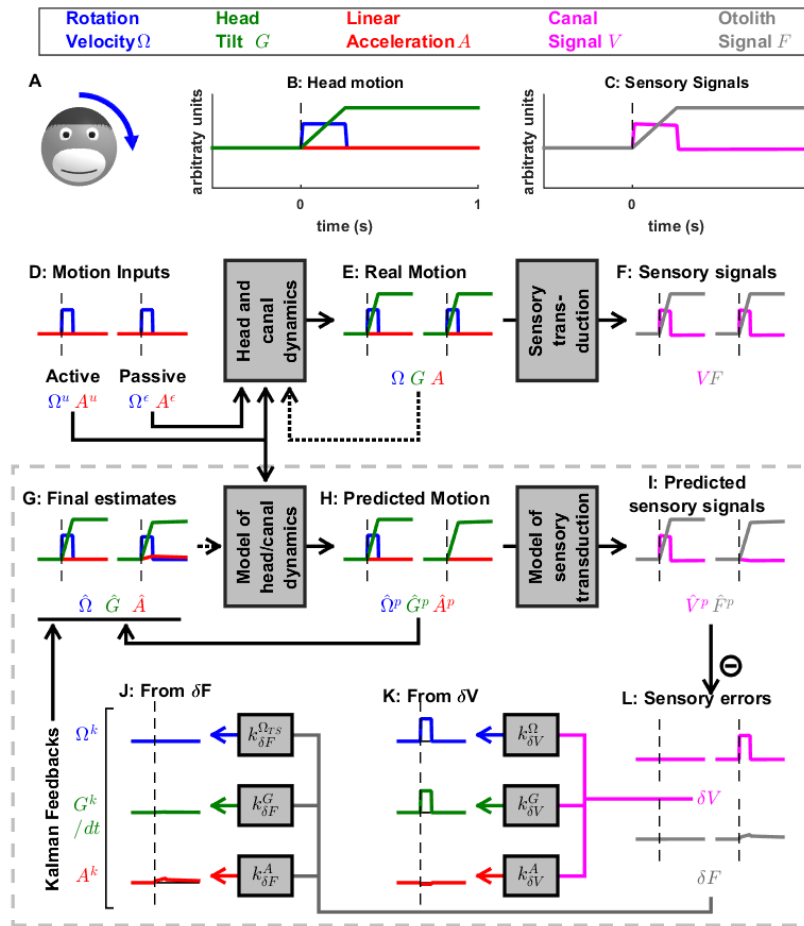

1206

1207 **Figure 5: Simulation of short duration head tilt.** (A) Illustration of the stimulus lasting 0.2 s. (B,C) Time  
 1208 course of motion variables and sensory (canal and otolith) signals. (D-L) Simulated variables during  
 1209 active (left panels) and passive motion (right panels). Three state variables are shown: the angular  
 1210 velocity  $\Omega$  (blue), tilt position  $G$ , and linear acceleration  $A$ . Continuous arrows represent the flow of  
 1211 information during one time step, and broken arrows the transfer of information from one time step to  
 1212 the next. (J, K) Kalman feedback (shown during passive motion only). Two error signals ( $\delta V$ : canal error;  
 1213  $\delta F$ : otolith error) are transformed into feedbacks to state variables  $\Omega^k$ : blue,  $G^k$ : green,  $A^k$ : red  
 1214 (variable  $C^k$  is not shown, but see Fig. 5, Suppl. 1 for simulations of a 2s tilt). Feedback originating from  
 1215  $\delta F$  is shown in (J) and from  $\delta V$  in (K). The feedbacks to  $G^k$  are scaled by a factor  $1/\delta t$  (see Suppl.  
 1216 Methods, 'Kalman feedback gains'). Note that in this simulation we consider an active ( $\Omega^u$ ) or passive  
 1217 ( $\Omega^e$ ) rotation velocity as input. The tilt itself is a consequence of the rotation, and not an independent  
 1218 input. The box defined by dashed gray lines illustrates the Kalman filter computations. For the rest of  
 1219 mathematical notations, see Table 1.

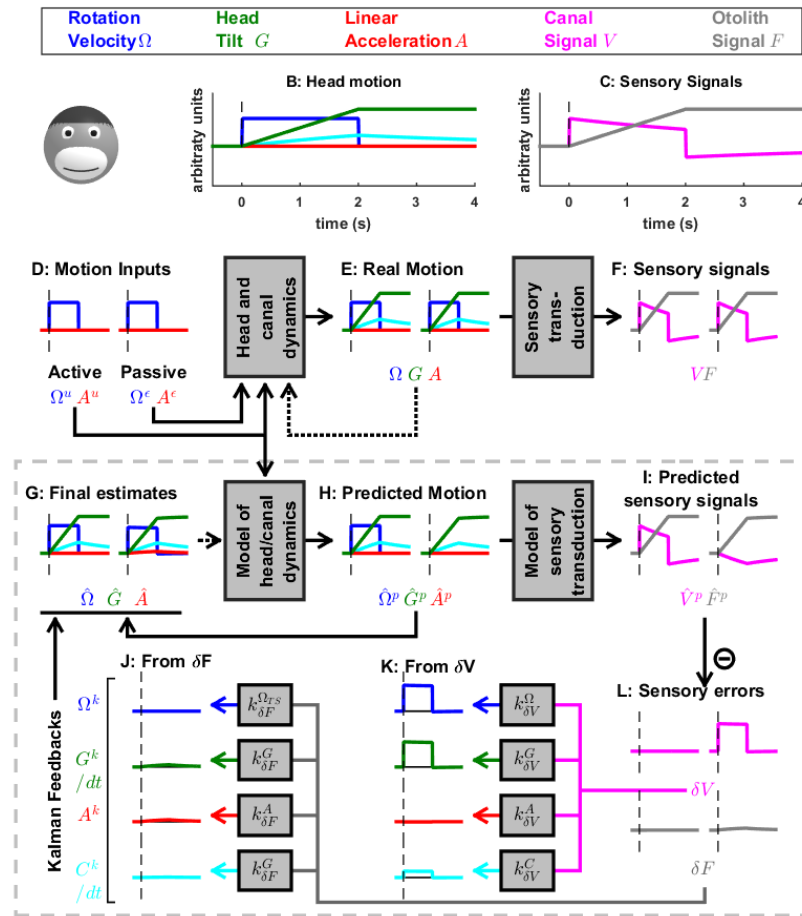

1220

1221 **Figure 5 Supplement 1:** Simulation of medium duration (2s) head tilt movement. Panels as in Fig. 5; the  
 1222 canal dynamics state variable,  $C$ , is shown in cyan. Although canal responses exhibit significant dynamics  
 1223 (magenta in panel C), rotation perception remains accurate (panel G, blue traces) during both active and  
 1224 passive tilt (as in Fig. 4). The final estimate of tilt (panel G, green traces) is also accurate during active  
 1225 and passive tilt. As a consequence, the otolith error (panel L, gray traces) and the corresponding Kalman  
 1226 feedback (J) are negligible. Note that the feedbacks to  $G^k$  and  $C^k$  are scaled by a factor  $1/\delta t$  (because of  
 1227 the integration; see Suppl. Methods, ‘Kalman feedback gains’).

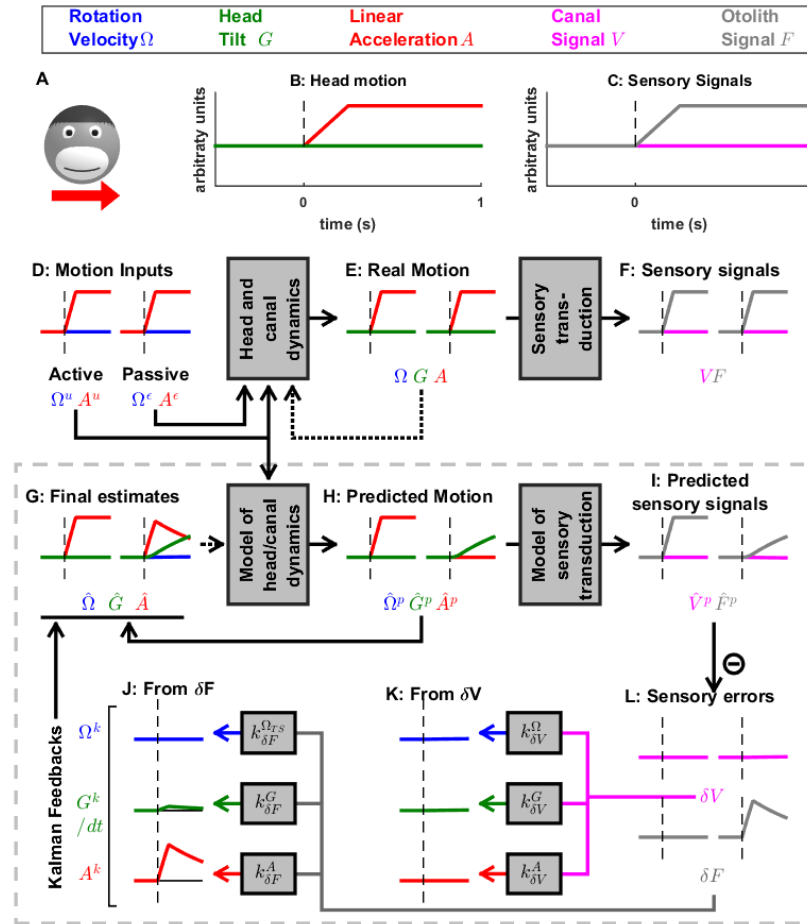

1228

1229 **Figure 6: Simulation of short duration translation.** Same legend as Fig. 5. Note that  $F$  is identical in Fig.

1230 5 and 6: in terms of sensory inputs, these simulation differ only in the canal signal.

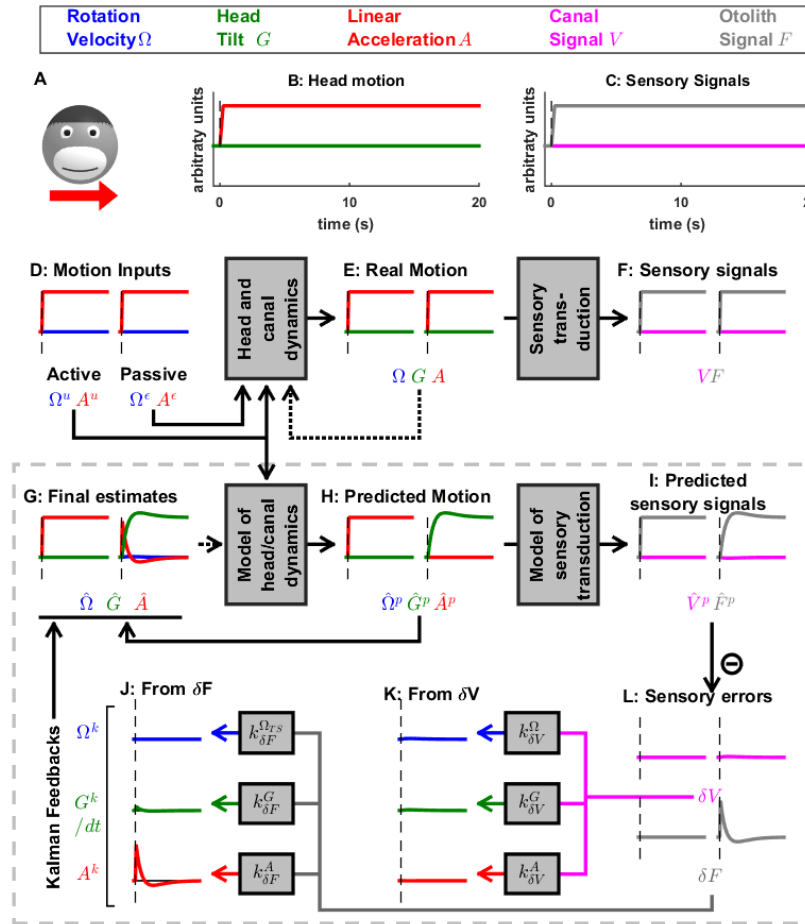

1231

1232 **Figure 6 Supplement 1: Long duration translation, demonstrating the time course of the somatogravic**  
 1233 **effect.** Note that  $\hat{G}$  slightly overshoots  $F$  transiently: this is the indirect consequence of an additional  
 1234 feedback from  $\delta F$  to  $\hat{C}$  (not shown here for simplicity; but detailed in Laurens and Angelaki, 2011). In  
 1235 this simulation, we observe that the tilt estimate  $\hat{G}$  develops until its magnitude matches the otolith  
 1236 signal  $F$ . At this point, the corresponding predicted otolith signal  $\hat{F}^p = \hat{G}^p$  matches the real signal  $F$ .  
 1237 Therefore, the otolith error,  $\delta F$ , as well as the net acceleration estimate,  $\hat{A}$ , vanish. This feedback,  
 1238 which allows the otolith organs to create a rotation signal, has only a low magnitude and a slight effect  
 1239 on the dynamics of  $\hat{G}$  in this simulation. In general, however, it allows the otolith system to detect head  
 1240 rotation relative to gravity or the lack thereof and has a profound effect on the low-frequency dynamics  
 1241 of rotation perception (Fig. 6 Suppl. 3; see also Angelaki and Hess 1995a,b; Laurens et al. 2010; Laurens  
 1242 and Angelaki 2011).

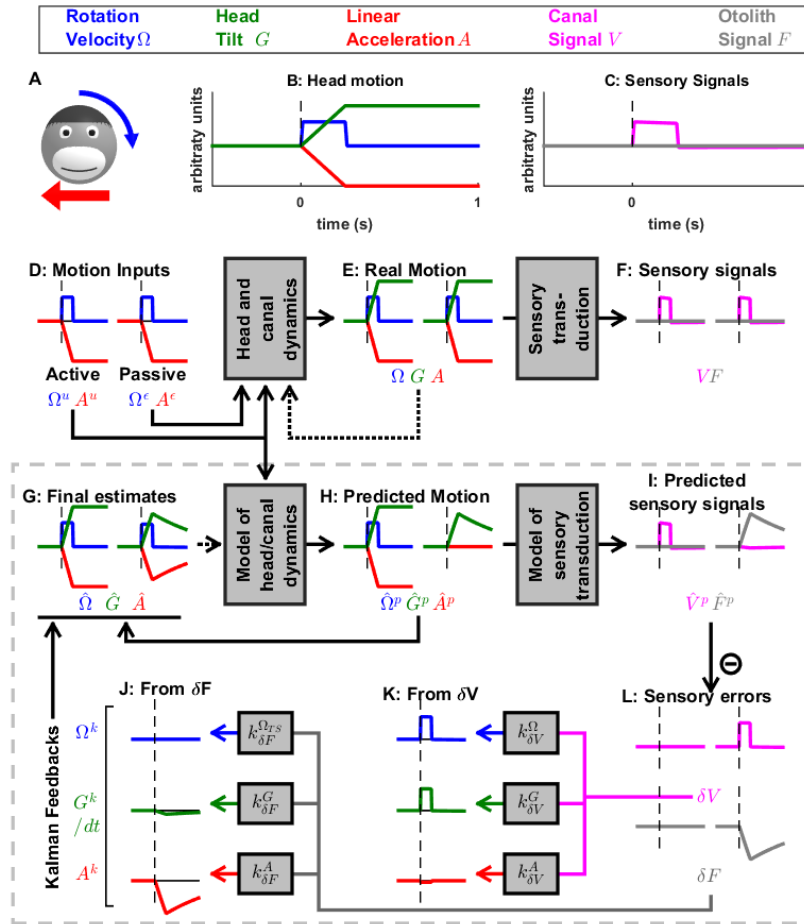

1243

1244 **Figure 6 Supplement 2: Simulation of simultaneous tilt and translation.** Head tilt (as in Fig. 5) and  
 1245 translation (as in Fig. 6 but in the opposite direction) are performed simultaneously. As a consequence,  
 1246 the otolith signals (that are identical in Fig. 5C and Fig. 6C) now cancel each other (panel C, gray trace).  
 1247 This protocol can be seen as an activation of the semicircular canals that indicates a tilt movement, but  
 1248 in the absence of the corresponding tilt-induced activation of the otolith organs. As expected, and in  
 1249 agreement with behavioral (Angelaki et al. 1999; Merfeld et al. 1999) and neuronal findings (Angelaki et  
 1250 al. 2004; Shaikh et al. 2005; Yakusheva et al. 2007, 2008, 2013, Laurens et al. 2013a,b), the results of a  
 1251 tilt-translation simulation are the sum of a tilt simulation and a translation simulation (the latter being  
 1252 reversed). Interestingly, this simulation illustrates how activation of the semicircular canals without a  
 1253 corresponding activation of the otoliths leads to an otolith error (panel L, gray trace signaling  $\delta F$ ). This  
 1254 simulates how translation-selective neurons in the vestibular nuclei and cerebellum modulate during  
 1255 tilt-translation in experimental studies using this stimulus (Angelaki et al. 2004; Shaikh et al. 2005;  
 1256 Yakusheva et al. 2007, 2008, 2013, Laurens et al. 2013a,b).



1257

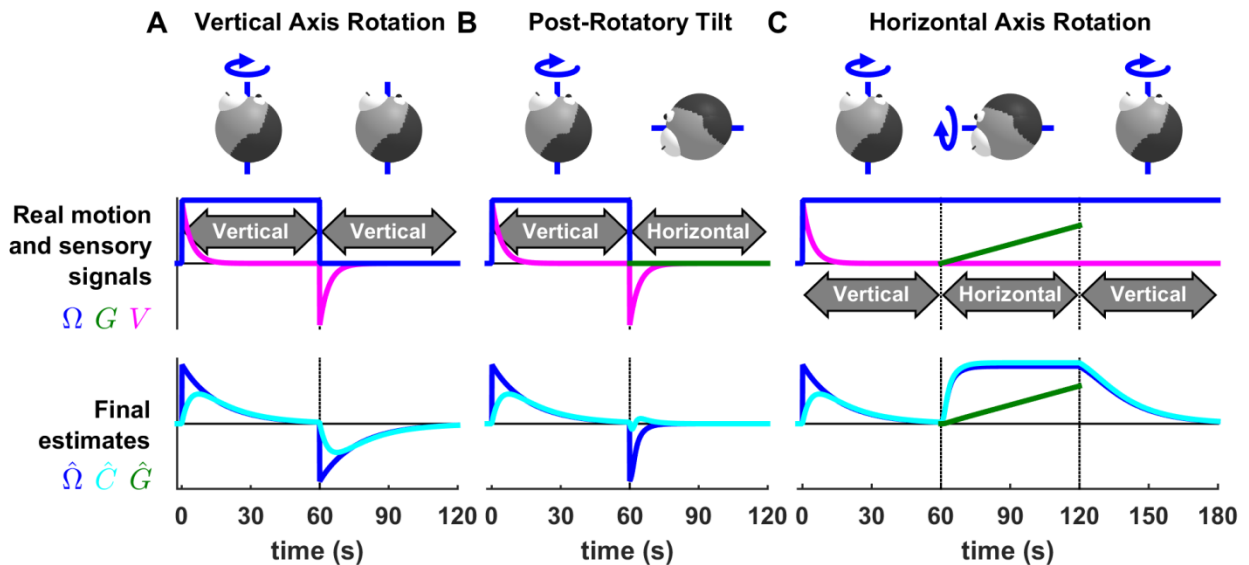

1258

1259 **Figure 6 Supplement 3: Otolith influence on rotation estimate during passive rotations.** These  
 1260 simulations show that signals from the otoliths (that sense indirectly whether or not the head rotates  
 1261 relative to gravity) can also influence the rotation estimate  $\hat{\Omega}$  at low frequencies (this property has been  
 1262 extensively considered by Laurens and Angelaki, 2011). (A) Long-duration EVAR (“Vertical” refers to the  
 1263 orientation of the rotation axis), similar to Fig. 4 Suppl. 2B. The post-rotatory response (from  $t=60s$  to  
 1264  $t=120s$ ) is identical (with a reversed sign) to the initial rotatory response (from  $t = 0$  to  $t = 60s$ ). (B) Post-  
 1265 rotatory tilt (Angelaki and Hess 1995a, Laurens et al. 2010), where the head is rapidly reoriented at  
 1266  $t=60s$  such that the rotation axis (i.e. around which the head rotated from  $t=0$  to  $t=60s$ ) becomes  
 1267 horizontal. The post-rotatory response is largely suppressed (time constant = 2.7s versus 16s in A). (C)  
 1268 Earth-horizontal Axis Rotation (Angelaki and Hess 1995b, Laurens et al. 2010), where the head is first  
 1269 rotated around a vertical axis until the canal signal  $V$  (and rotation estimates  $\hat{\Omega}$  and  $\hat{C}$ ) subside. Next  
 1270 ( $t=60s$ ) the rotation axis is reoriented. The reorientation does not activate the canals (magenta). Yet, a  
 1271 rotation estimate  $\hat{\Omega} \approx \hat{C}$  develops, rising exponentially with a short time constant (3.1s) close to the  
 1272 time constant of the post-rotatory response (as in Laurens et al. 2010). The rotation estimates  $\hat{\Omega}$  and  $\hat{C}$   
 1273 decrease exponentially when the rotation axis is reoriented back to vertical at  $t = 120s$ . These  
 1274 simulations illustrate the influence of the velocity feedback from the otoliths to  $\hat{C}$  (detailed can be found  
 1275 in Laurens and Angelaki, 2011).

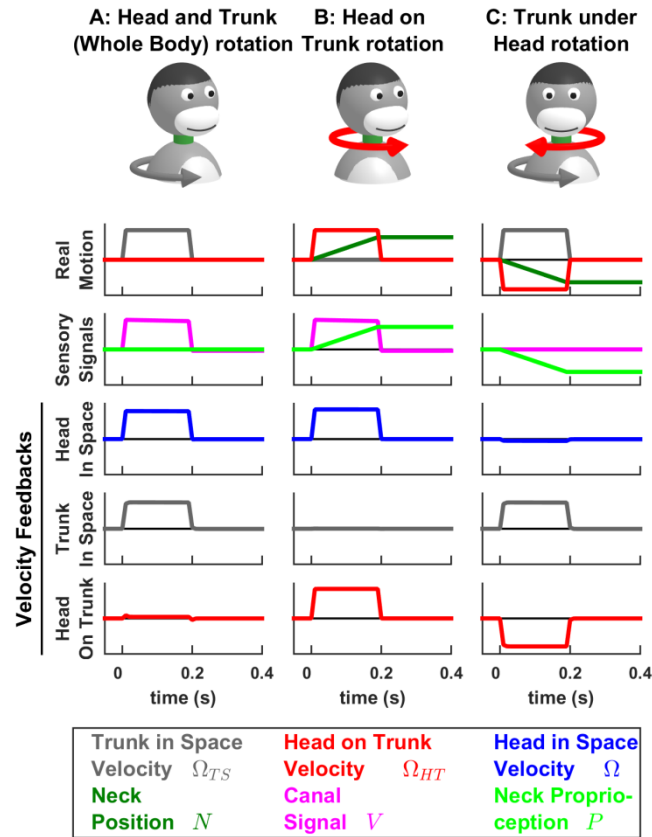

1276

1277 **Figure 7: Simulations of passive trunk and head movements.** We use a variant of the Kalman filter  
 1278 model (see Suppl. Methods) that tracks the velocity of both head and trunk (trunk in space: gray; head  
 1279 in space: blue; head on trunk: red) based on semicircular canal and neck proprioception signals. The real  
 1280 motion (first line), sensory signals (second line) and velocity feedback signals (third to fifth lines) are  
 1281 shown during (A) passive whole head and trunk rotation, (B) passive head on trunk rotation, and (C)  
 1282 passive trunk under head rotation. See Fig. 7 Suppl. 1-3 for other variables and simulations of active  
 1283 motion.

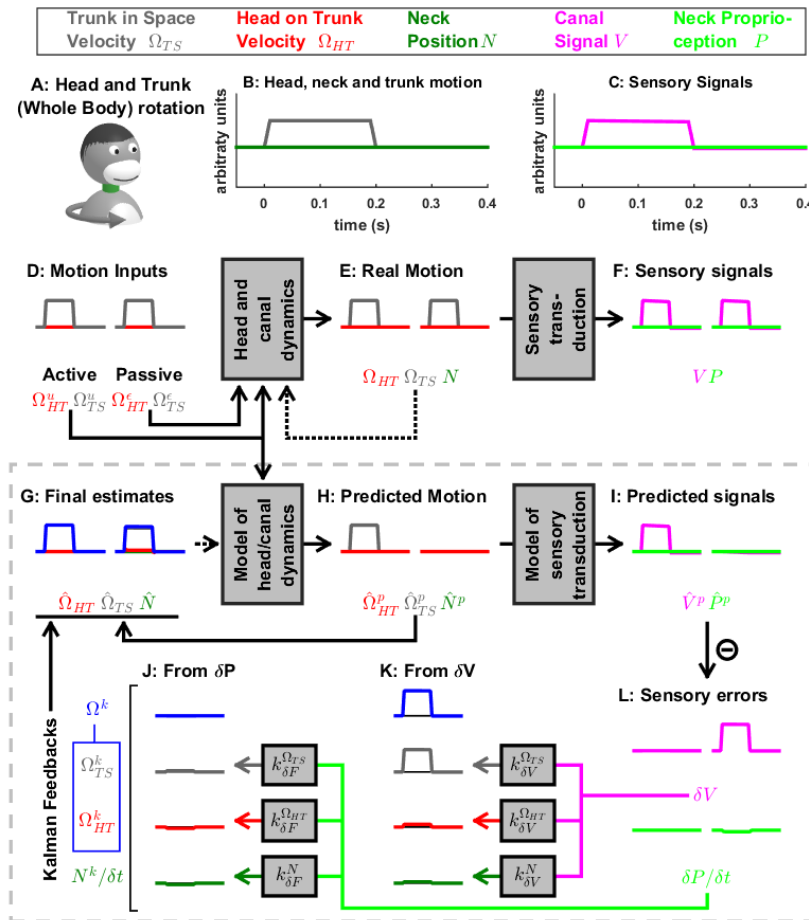

1284

1285 **Figure 7 Supplement 1: Active and passive head and trunk rotation.** (A) Illustration of the stimulus. (B)

1286 Motion variables. (C) Sensory signals. (D-J) Simulated variables during active (left panels) and passive

1287 motion (right panels). Continuous arrows represent the flow of information during one time step, and

1288 broken arrows the transfer of information from one time step to the next. (K,J) Kalman feedback, shown

1289 during passive motion only (it is always zero during active movements in the absence of any

1290 perturbation and noise). For the rest of mathematical notations, see Table 1. In this simulation, the

1291 head/trunk rotates for 0.2s (thus, canal dynamics are excluded for simplicity). During active rotation, the

1292 predicted motion and sensory signals match the real motion and sensory signals, and sensory errors are

1293 null. During passive rotation, sensory errors are transformed into feedback signals (J,K) to  $\hat{\Omega}_{TS}$

1294 (gray),  $\hat{\Omega}_{HT}$  (red) and  $\hat{N}$  (green; note that the feedback  $N^k$  is scaled by  $1/\delta t$ , see Suppl. Methods,

1295 'Feedback signals during neck movement'). The feedback about head velocity in space  $\Omega^k$  (blue) is not

1296 directly computed by the model, but defined as the sum of  $\Omega_{TS}^k$  and  $\Omega_{HT}^k$ . The canal error  $\delta V$  (panel L,

1297 magenta), which is similar to Fig. 3,4, is converted into a feedback about trunk in space velocity ( $\Omega_{TS}^k$ ,

1298 panel K, gray) and a corresponding feedback about head in space velocity  $\Omega^k$ , whereas other feedbacks  
1299 originating from  $\delta V$  have a limited magnitude (see Table 3). The proprioceptive error  $\delta P$  (panel L, green;  
1300 note that  $\delta P$  is scaled by  $1/\delta t$ , see Suppl. Methods, 'Feedback signals during neck movement') is close  
1301 to zero. In conclusion, as expected, an activation of the semicircular canals (when proprioceptive  
1302 information doesn't indicate a movement of the neck) induces a perception of whole head and trunk  
1303 rotation, where the head and the trunk move together.

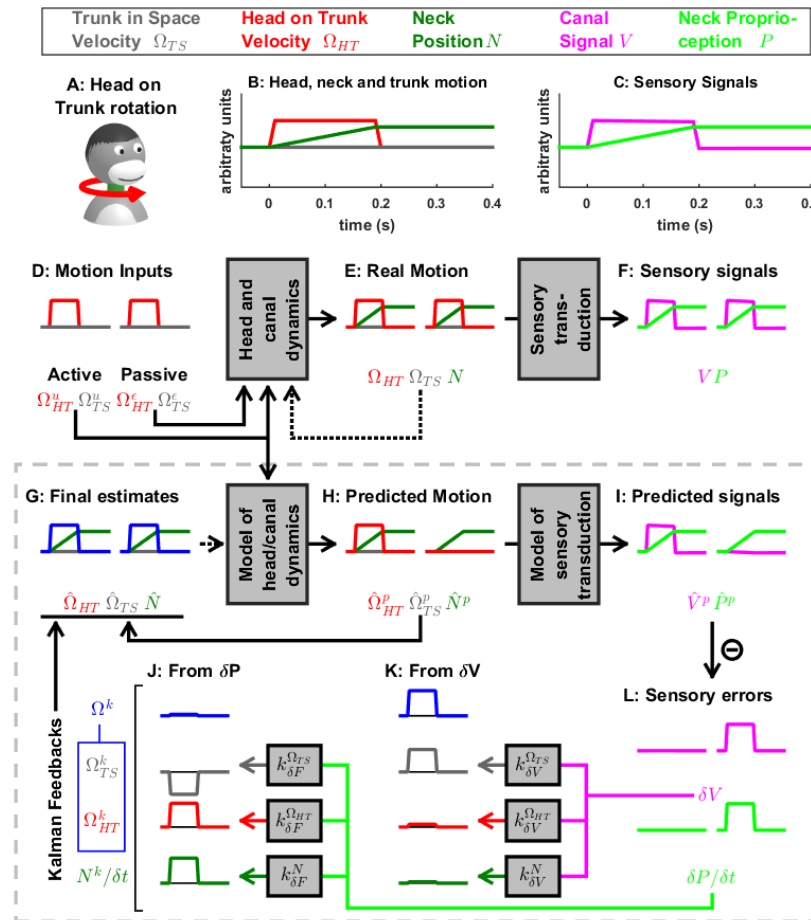

1304

1305 **Figure 7 Supplement 2: Active and passive head on trunk rotation.** (A) Illustration of the stimulus. (B)  
 1306 Motion variables: the head rotates on the trunk ( $\Omega_{HT}$ , red) for 0.2s, and the neck position  $N$  increases  
 1307 during this period. (C) The sensory signals encode head velocity (canal signal,  $V$ , magenta) and neck  
 1308 position (proprioceptive signal,  $P$ , green). (D-J) Simulated variables during active (left panels) and  
 1309 passive motion (right panels). Continuous arrows represent the flow of information during one time  
 1310 step, and broken arrows the transfer of information from one time step to the next. (K,J) Kalman  
 1311 feedback, shown during passive motion only (it is always zero during active movements in the absence  
 1312 of any perturbation and noise).

1313 Passive motion induces the same canal error  $\delta V$  as in Fig. 7 Suppl. 1. Furthermore, during passive  
 1314 motion, there is a small but significant mismatch between the predicted and actual proprioceptive  
 1315 signals (see Suppl. Methods, 'Feedback signals during neck movements') resulting in a proprioceptive  
 1316 error  $\delta P$ . Note that, although proprioceptive signals  $P$  encode neck position,  $\delta P$  encodes the velocity of  
 1317 the movement (panel L; green). As in Fig. 7 Suppl. 1, the error  $\delta V$  is converted into a feedback that

1318 encodes rotation of the trunk in space (panel K,  $\Omega_{TS}^k$ , gray). However, the error  $\delta P$  is converted into an  
1319 opposite feedback (panel J,  $\Omega_{TS}^k$ , gray). Therefore, the total trunk rotation feedback and the final  
1320 estimate of trunk velocity  $\hat{\Omega}_{TS}$  (panel G, gray) are zero. Furthermore,  $\delta P$  is converted into feedback  $\Omega_{HT}^k$   
1321 that encodes the velocity of the head relative to the trunk (panel J, red).

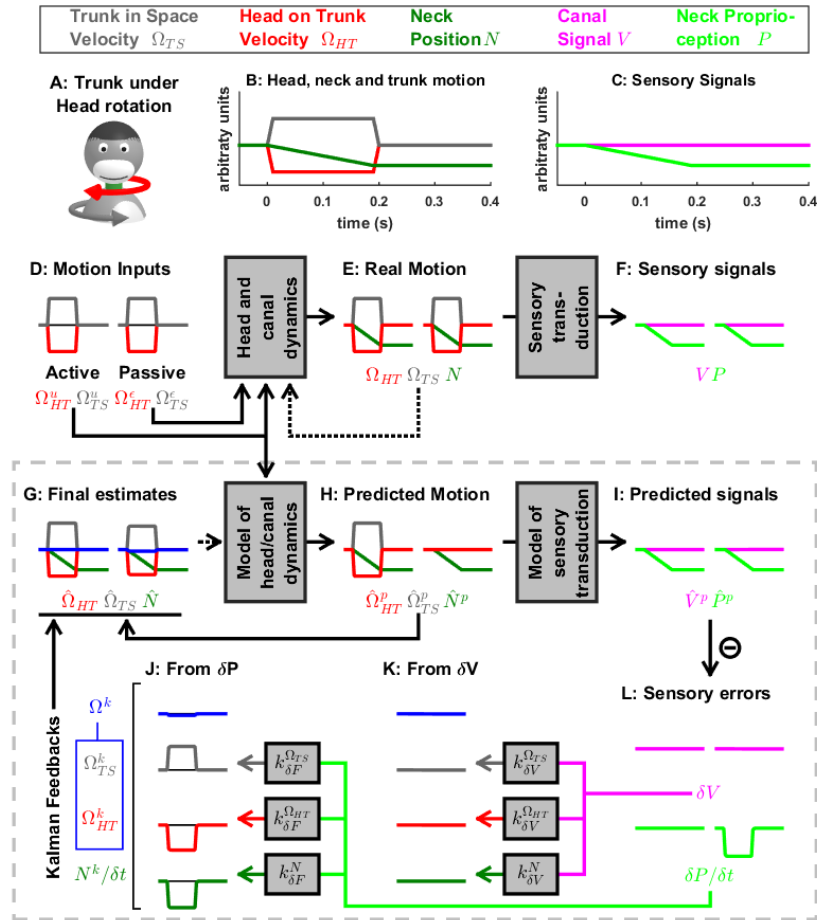

1322

1323 **Figure 7 Supplement 3: Active and passive rotation of the trunk while the head is stationary.** This  
 1324 paradigm illustrates information processing in response to neck rotation in the absence of semicircular  
 1325 canal stimulation. Signals and parameters as in Fig. 7 Suppl. 1 and 2.

1326

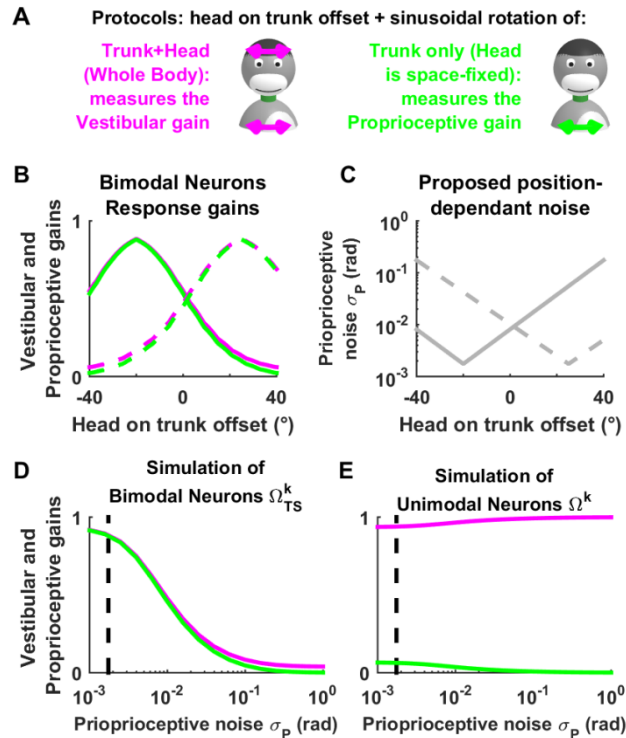

1327

1328 **Figure 7 Supplement 4: Simulated tuning of unimodal and bimodal neuron as a function of neck**  
 1329 **position offset.** (A) Experimental manipulation used by (Brooks and Cullen 2009) to demonstrate that  
 1330 the response of bimodal neurons to sinusoidal motion varies if a head rotation offset is superimposed to  
 1331 the sinusoidal stimulus. (B) Schematic responses of two bimodal neurons (one in solid lines and the  
 1332 other in broken lines). Individual neurons exhibit hill-shaped tuning curves as a function of head rotation  
 1333 offset, and the location of the peak varies from neuron to neuron. Remarkably, neurons exhibit similar  
 1334 tuning curves in response to canal stimulation (rotation of the head and trunk; magenta curves), and to  
 1335 neck proprioceptor stimulation (rotation of the trunk only, green). The fact that these tuning curves are  
 1336 matched allows bimodal neurons to encode trunk velocity during combined trunk and head motion,  
 1337 regardless of head position offset (Brooks and Cullen 2009). However, the reason why bimodal neuron  
 1338 responses are modulated as a function of head offset is unknown.

1339 We propose that head rotation offset extends or contracts individual neck muscles and affects the signal  
 1340 to noise ratio of their afferent proprioceptive signals. Assuming that individual neurons receive  
 1341 proprioceptive afferents from distinct pools of muscles, the signal to noise ratio of proprioceptive signals  
 1342 would form a distinct curve in each neuron (C: the solid and broken curves correspond to the solid and  
 1343 broken curves in B). (D) Simulations of bimodal neurons (i.e. the trunk velocity feedback  $\Omega_{TS}^k$ ) during



1344 passive trunk and head rotation (magenta) and trunk only rotation (green), with increasing amount of  
1345 proprioceptive noise  $\sigma_p$  (the vertical broken lines in (A,B) indicate the value  $\sigma_p$  used in other figures).  
1346 We find that increasing  $\sigma_p$  leads to a concomitant decrease of the response gains in both conditions.  
1347 The responses curves in (B) can be obtained by combining panels (C) and (D).

1348 (E) Furthermore, we find that the simulated response of unimodal neurons (assumed to encode the  
1349 trunk velocity feedback  $\Omega^k$ ) is independent of proprioceptive noise, in agreement with experimental  
1350 results (Brooks and Cullen 2009) that demonstrate that that gain of unimodal neurons is not sensitive to  
1351 static neck position.

1352

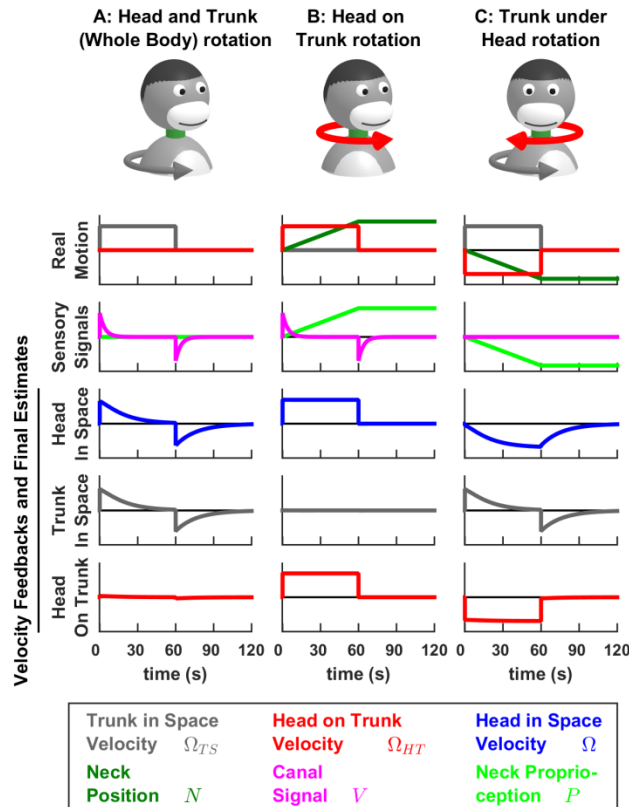

1353

1354 **Figure 7 Supplement 5: Long-duration passive head and trunk movements.** The dynamics of head and  
 1355 trunk rotation perception during combined passive head and trunk movements was studied by (Mergner  
 1356 et al. 1991). Here we reproduce the results of this study by simulating the same movements as in Fig. 7  
 1357 with a longer rotation duration (60s). The feedback signals about head in space velocity (third row,  
 1358 blue), trunk in space velocity (fourth row, gray) and head on trunk velocity (fifth row, red) are shown.  
 1359 During passive motion, these feedback are identical to the final motion estimates, and therefore, the  
 1360 curves in rows 3 to 5 also represent the perception of motion during these stimuli.

1361 A combined rotation of the head and the trunk (A) activates the canals (magenta curve). Following the  
 1362 initial acceleration at  $t=0$ , canal signals fade away with a time constant of 4s. A canal aftereffect occurs  
 1363 following the deceleration at  $t=60$ s. The estimates of head in space and trunk in space velocity are  
 1364 identical to each other, and exhibit similar dynamics as the canal signal, although with a longer time  
 1365 constant of 16.5s (for the same reasons as those described in Fig. 4 Suppl. 1B).

1366 When rotating the head while the trunk is stationary (B), the simulated estimates of head in space  
 1367 (third row, blue) and head on trunk (fifth row, red) velocity persist indefinitely, as illustrated

1368 experimentally by Mergner et al. (1991). The difference in the time course of the signals in panels A and  
1369 B is due to the additional presence of the neck proprioceptive signal.

1370 Strikingly, during a long duration rotation (C), the estimate of trunk in space velocity (fourth row, gray)  
1371 decreases with an identical time constant as in (A), although the underlying sensory signals, that  
1372 originate from the canals in A and from neck proprioception in C, have fundamentally different  
1373 dynamics. Furthermore, the perception of trunk rotation is replaced by an illusion of head rotation in  
1374 space (third row, blue) in an opposite direction. These model predictions exactly match experimental  
1375 findings by Mergner et al. (1991).

1376

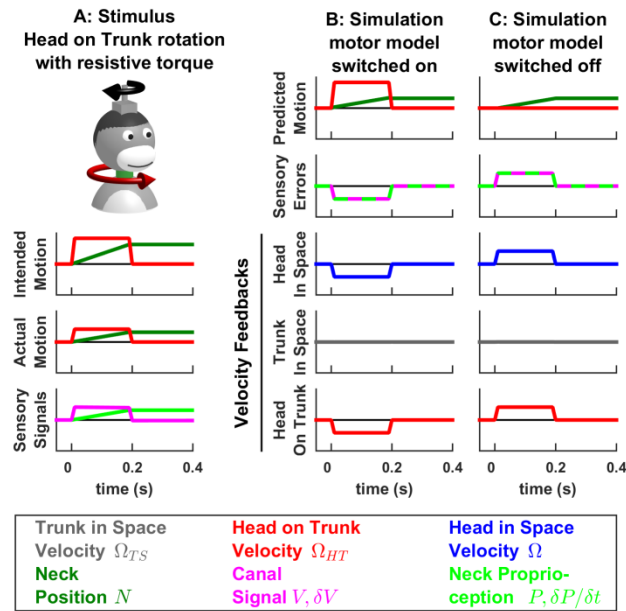

1377

1378 **Figure 7 Supplement 6: Impact of perturbing motor activity during active movement.** Experimental  
 1379 studies (Roy and Cullen, 2001; 2004; Carriot et al. 2013; Brooks et al., 2015; Brooks and Cullen, 2015;  
 1380 Cullen and Brooks, 2015) have demonstrated that central neurons encode active and passive motion  
 1381 (i.e. head velocity or linear acceleration) indiscriminately when active movements are blocked or  
 1382 perturbed by unexpected torque, as simulated here. (A) Simulated experimental condition, where the  
 1383 animal attempts to perform a head movement (while the trunk remains immobile). Due to an  
 1384 unexpected resistive torque, the actual movement amplitude and velocity are only half of the intended  
 1385 motion, as indicated by neck position (green) and head velocity (red) traces (compare “Intended  
 1386 Motion” and “Actual Motion” panels). The resulting sensory signals (canals, magenta, and neck  
 1387 proprioceptors, green) encode the actual (reduced) velocity and amplitude of the movement. (B)  
 1388 Kalman filter simulation using the same model than in Fig. 7. Because the actual head velocity (A,  
 1389 “Actual Motion”) is slower than the predicted velocity (B, “Predicted Motion”), a negative canal error  $\delta V$   
 1390 occurs (the predicted neck position and proprioceptive error are discussed below). As a result, the  
 1391 velocity feedback about head in space (blue) is negative. (C) Alternative simulation, where the internal  
 1392 model of the motor plant is switched off (the matrix  $M$  in Fig. 1 is set to zero). In this situation, the  
 1393 motion is perceived as if it was entirely passive (exactly as in Fig. 7 Suppl. 2, with only half the  
 1394 amplitude) and therefore the feedback pathways encode a positive head in space velocity signal. Thus,  
 1395 the simulation in B predicts that central neurons, that encode feedback signals about head velocity in  
 1396 space, are inhibited in this experimental condition. In contrast, the simulation in C predicts that these

1397 neurons are activated (and encode net head velocity with the same gain as in Fig. 7 Suppl. 2).  
1398 Experiments (Brooks et al. 2015) yield results consistent with (C) but contrary to (B). This indicates that a  
1399 mechanism, which is additional to the Kalman filter algorithm (shown Fig. 1, 9 and used in panel B),  
1400 switches the motor model off when active movements are perturbed.

1401 Note that, in (B) and (C), the predicted neck position is close to the actual position and the  
1402 proprioceptive error  $\delta P/\delta t$  encodes a velocity error (close to  $\delta V$ ). This occurs for the same reason as  
1403 during passive neck movements, as described in Supplementary Methods, “Feedback signals during neck  
1404 movement”.

1405

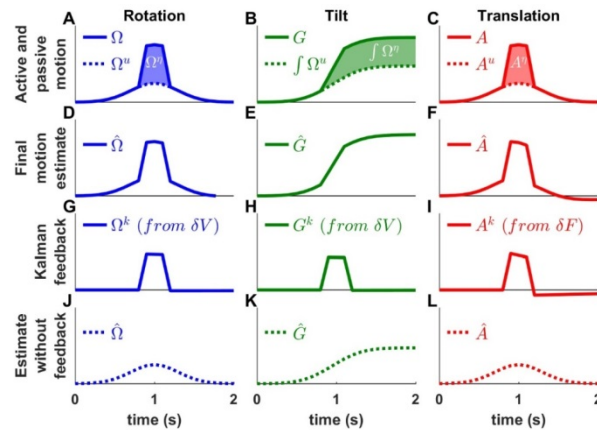

1406

1407 **Figure 8: Interaction of active and passive motion.** Active movements (Gaussian profiles) and passive  
 1408 movements (short trapezoidal profiles) are superimposed. (A) Active ( $\Omega^u$ ) and passive ( $\Omega^e$ ) rotations. (B)  
 1409 Head tilt resulting from active and passive rotations (the corresponding tilt components are  $\int \Omega^u . dt$  and  
 1410  $\int \Omega^e . dt$ ). (C) Active ( $A^u$ ) and passive ( $A^e$ ) translations. (D-F) Final motion estimates (equal to the total  
 1411 motion). (G-I) The Kalman feedbacks correspond to the passive motion component. (J-K) Final estimates  
 1412 computed by inactivating all Kalman feedback pathways. These simulations represent the motion  
 1413 estimates that would be produced if the brain suppressed sensory inflow during active motion.

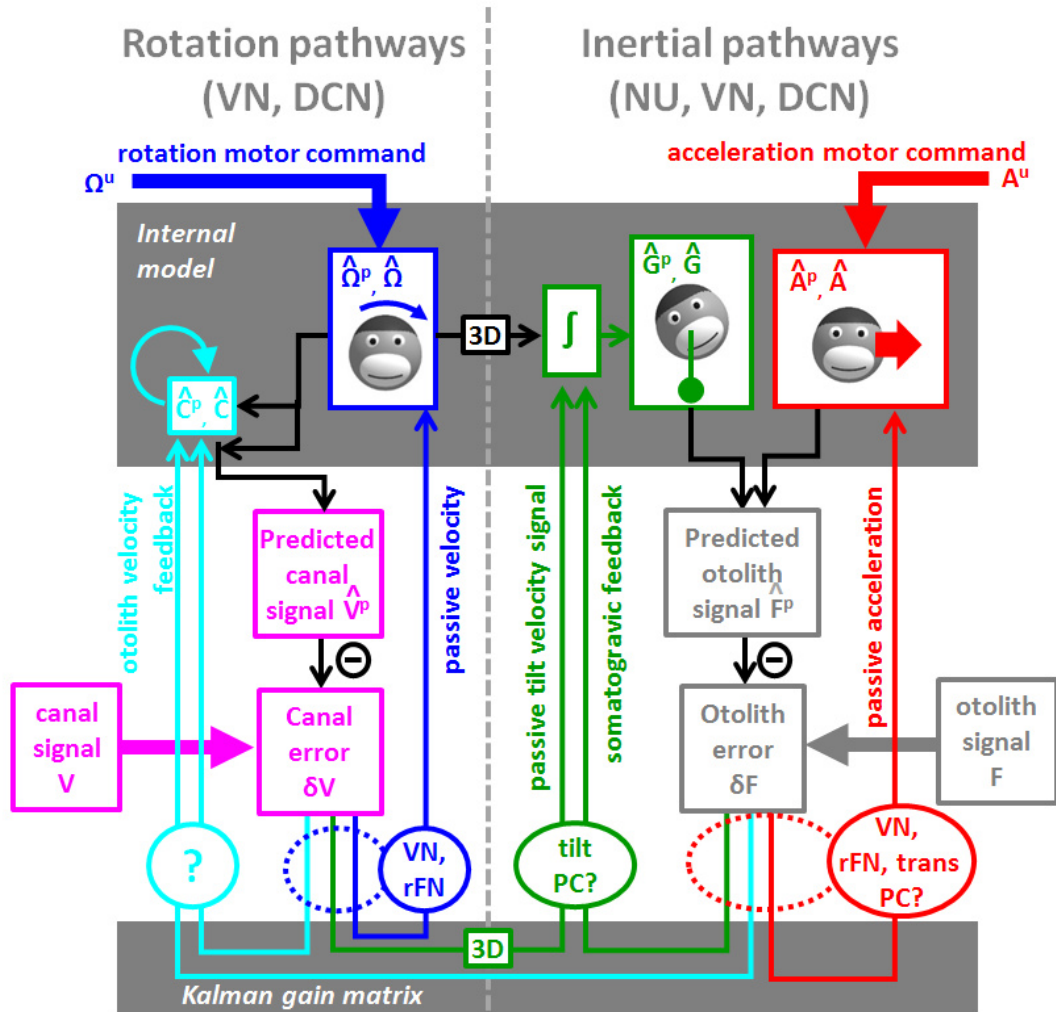

1414

1415 **Figure 9: Schematic diagram of central vestibular computations.** This diagram is organized to offer a  
 1416 synthetic view of the processing elements, as well as their putative neural correlates. An internal model  
 1417 (top gray box) predicts head motion based on motor commands and receives feedback signals. The  
 1418 internal model computes predicted canal and otolith signals that are compared to actual canal and  
 1419 otolith inputs. The resulting sensory errors are transformed by the Kalman gain matrix into a series of  
 1420 feedback 'error' signals. Left: canal error feedback signals; Right: otolith error feedback signals. Rotation  
 1421 signals are spatially transformed ("3D" boxes) into tilt velocity signals. Ovals indicate putative neuronal  
 1422 correlates of the feedback signals (VN: vestibular only vestibular nuclei neurons; rFN: rostral fastigial  
 1423 nuclei neurons, PC: Purkinje cells in the caudal vermis, DCN: deep cerebellar nuclei).

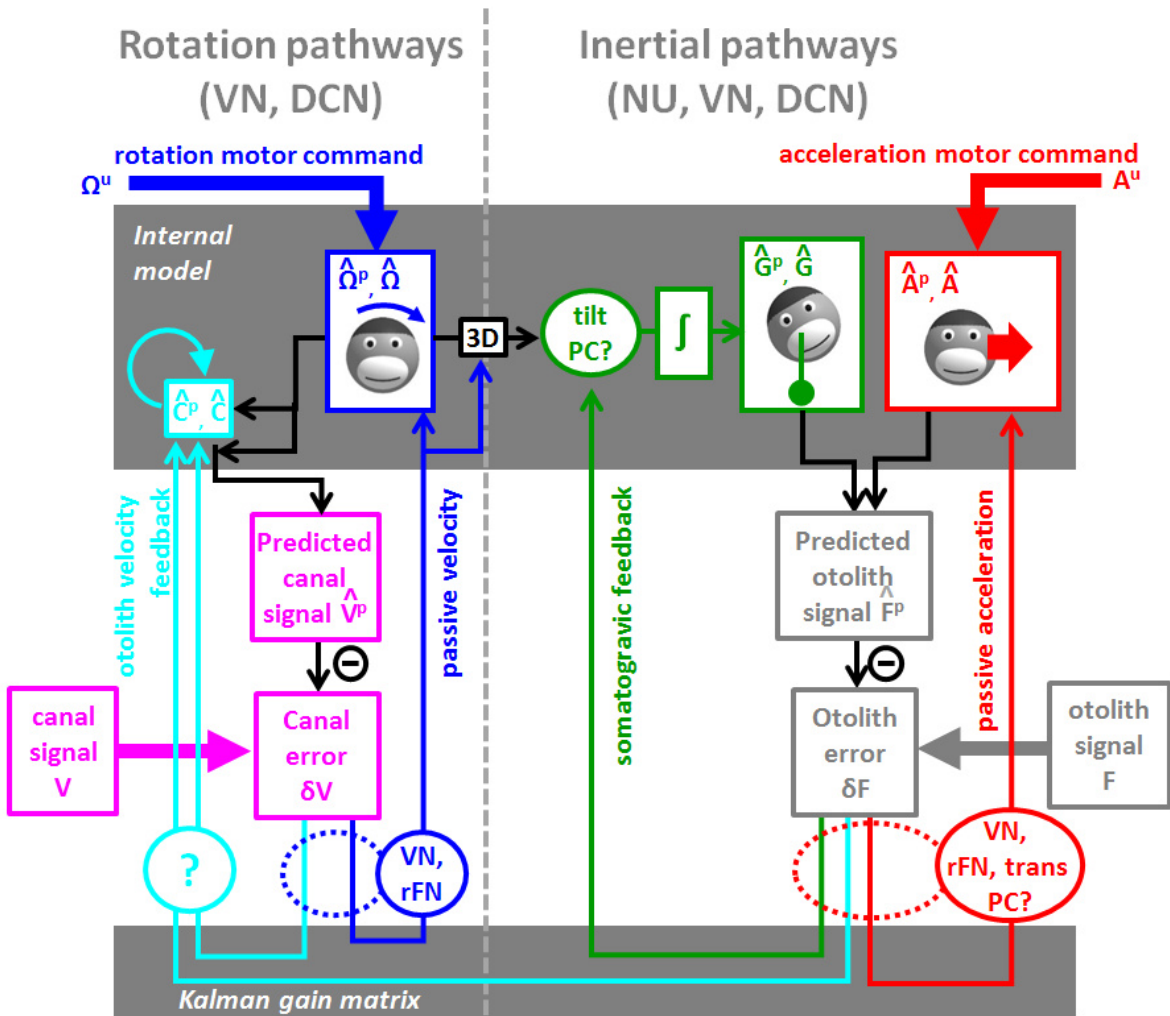

1424

1425 **Figure 9 Supplement 1: Alternative diagram**, where the Kalman feedback encoding passive tilt velocity  
 1426 is removed. Instead, a final rotation estimate  $\hat{\Omega}$  is computed and transformed into a tilt velocity signal.

1427



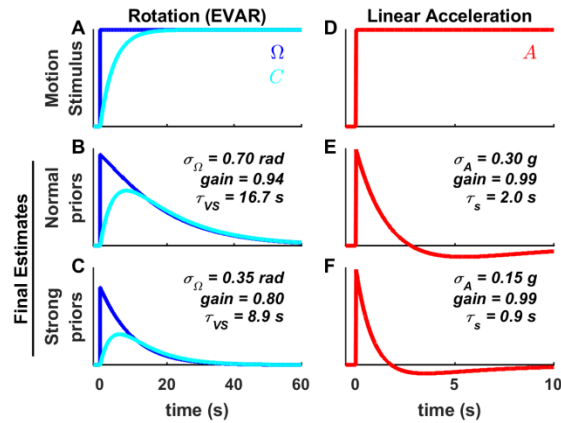

1428

1429 **Figure 9 Supplement 2: Influence of Bayesian priors on the dynamics of motion estimates.** We  
1430 simulated a passive long-duration rotation (A-C, similar as Fig. 4 Suppl. 2A) and a passive constant linear  
1431 acceleration (D-E, similar as Fig 6 Suppl. 1). Simulations were performed with the same set of  
1432 parameters as in other figures (B,E), or with lower values of  $\sigma_{\Omega}$  and  $\sigma_A$  resulting in narrower  
1433 distributions of  $\Omega^E$  (C) and  $A^E$  (F). These distributions represent Bayesian priors that drive dynamic  
1434 motion estimate towards zero. As a consequence, narrowing the priors decreased the gain and time  
1435 constant of the rotation estimate (C; time constant  $\tau_{VS}$ ) and of the acceleration estimate (D; time  
1436 constant  $\tau_s$ ).

1437

## Supplementary Methods

1438 Here we describe the Kalman model in more detail. We present the model of head motion and  
 1439 vestibular information processing, first as a set of linear equations ('Model of head motion and  
 1440 vestibular sensors'), and then in matrix form ('Model of head motion in matrix form'). Next we present  
 1441 the Kalman filter algorithm, in the form of matrix computations ('Kalman filter algorithm') and then as a  
 1442 series of equations ('Kalman filter algorithm developed').

1443 Next, we derive a series of properties of the internal model computations ('Velocity Storage during  
 1444 EVAR'; 'Passive Tilt', 'Kalman feedback gains', 'Time constant of the somatogravic effect', 'Model of  
 1445 motor commands').

1446 We then present some variations of the Kalman model ('Visual rotation signals', 'Model of head and  
 1447 neck rotations', 'Feedback signals during neck movement', 'Three-dimensional Kalman filter').

### 1448 Model of head motion and vestibular sensors

1449 The model of head motion in (Fig. 2) can be described by the following equations (see Table 1 for a list  
 1450 of mathematical variables):

$$\begin{cases}
 \Omega(t) = 0 & + \Omega^u(t) + \Omega^\varepsilon(t) & (eq. 1) \\
 C(t) = k_1 \cdot C(t - \delta t) + k_2 \cdot \Omega(t) & + 0 + 0 & (eq. 2) \\
 G(t) = G(t - \delta t) + s \cdot \delta t \cdot \Omega(t) & + 0 + 0 & (eq. 3) \\
 A(t) = 0 & + A^u(t) + A^\varepsilon(t) & (eq. 4)
 \end{cases}$$

1452

1453 Here, *eq. 1* states that head velocity  $\Omega(t)$  is the sum of self-generated rotation  $\Omega^u(t)$  and an externally  
 1454 generated rotation  $\Omega^\varepsilon(t)$ . Therefore, in the absence of motor commands,  $\Omega(t)$  is expected to be zero  
 1455 on average, independently from all previous events.

1456 *Eq. 2* describes the first-order low-pass dynamics of the canals:

$$1457 \quad C(t) = C(t - \delta t) + \frac{\delta t}{\tau_c} \cdot (\Omega(t) - C(t))$$

1458 which yields:

$$1459 \quad C(t) = \frac{\tau}{\tau_c + \delta t} \cdot C(t - \delta t) + \frac{\delta t}{\tau_c + \delta t} \cdot \Omega(t) \quad (eq. 2)$$

1460 with  $k_1 = \frac{\tau}{\tau_c + \delta t}$  and  $k_2 = \frac{\delta t}{\tau_c + \delta t}$ .

1461 *Eq. 3* integrates rotation  $\Omega$  into tilt  $G$ . The variable  $s$  acts as a switch: it is set to 1 during tilt and to 0  
 1462 during EVAR (in which case  $G$  remains equal to zero, independently of  $\Omega$ ).

1463 Finally, *Eq. 4* that describes linear acceleration, resembles *Eq. 1* in form and properties.

1464 The system of these equations is rewritten as follows in order to eliminate  $\Omega(t)$  from the right-hand side  
 1465 (which is needed so that it may fit into the form of *eq. 7* below):

1466 
$$\begin{cases} \Omega(t) = 0 + \Omega^u(t) + \Omega^\varepsilon(t) & (eq. 1b) \\ C(t) = k_1 \cdot C(t - \delta t) + k_2 \cdot \Omega^u(t) + k_2 \cdot \Omega^\varepsilon(t) & (eq. 2b) \\ G(t) = G(t - \delta t) + s \cdot \delta t \cdot \Omega^u(t) + s \cdot \delta t \cdot \Omega^\varepsilon(t) & (eq. 3b) \\ A(t) = 0 + A^u(t) + A^\varepsilon(t) & (eq. 4b) \end{cases}$$

1467 The model sensory transduction is:

1468 
$$\begin{cases} V(t) = \Omega(t) - C(t) + V^\eta(t) & (eq. 5) \\ F(t) = G(t) + A(t) + F^\eta(t) & (eq. 6) \end{cases}$$

1469 *Eq. 5* indicates that the semicircular canals encode rotation velocity, minus the dynamic component  $C$ ;  
 1470 and *Eq. 6* indicates that the otolith organs encode the sum of tilt and acceleration.

### 1471 **Model of head motion in matrix form**

1472 The system of equations (1b – 4b) can be rewritten in matrix form:

1473 
$$X(t) = D \cdot X(t - \delta t) + M \cdot X^u(t) + E \cdot X^\varepsilon(t) \quad (eq. 7)$$

1474 with:

1475 
$$X = \begin{bmatrix} \Omega \\ C \\ G \\ A \end{bmatrix}, D = \begin{bmatrix} 0 & 0 & 0 & 0 \\ 0 & k_1 & 0 & 0 \\ 0 & 0 & 1 & 0 \\ 0 & 0 & 0 & 0 \end{bmatrix}, M = \begin{bmatrix} 1 & 0 \\ k_2 & 0 \\ s \cdot \delta t & 0 \\ 0 & 1 \end{bmatrix}, X^u = \begin{bmatrix} \Omega^u \\ A^u \end{bmatrix}, E = M, X^\varepsilon = \begin{bmatrix} \Omega^\varepsilon \\ A^\varepsilon \end{bmatrix}$$

1476 Similarly, the model of sensory transduction (*eq. 5 – 6*) is rewritten as:

1477 
$$S(t) = T \cdot X(t) + S^\eta(t) \quad (eq. 8)$$

1478 With:

1479 
$$S = \begin{bmatrix} V \\ F \end{bmatrix}, T = \begin{bmatrix} 1 & -1 & 0 & 0 \\ 0 & 0 & 1 & 1 \end{bmatrix}, S^\eta = \begin{bmatrix} V^\eta \\ F^\eta \end{bmatrix}$$

1480 Given the standard deviations of  $\Omega^\varepsilon$ ,  $A^\varepsilon$ ,  $V^\eta$  and  $F^\eta$  ( $\sigma_\Omega$ ,  $\sigma_A$ ,  $\sigma_V$  and  $\sigma_F$ ), the covariance matrices of  $X^\varepsilon$   
 1481 and  $S^\eta$  (that are needed to perform Kalman filter computations) are respectively:

1482 
$$Q = E \cdot \begin{bmatrix} \sigma_\Omega^2 & 0 \\ 0 & \sigma_A^2 \end{bmatrix} \cdot E' \text{ and } R = \begin{bmatrix} \sigma_V^2 & 0 \\ 0 & \sigma_F^2 \end{bmatrix}$$

1483 **Kalman filter algorithm**

1484 The Kalman filter algorithm (Kalman 1960) computes optimal state estimates in any model that follows  
 1485 the structure of (eqn. 7,8) (Fig. 1). The optimal estimate  $\hat{X}(t)$  is computed by the following steps (Fig.  
 1486 1B):

1487 
$$\hat{X}^p(t) = D \cdot \hat{X}(t - \delta t) + M \cdot X^u(t) \quad (\text{state prediction})$$

1488 
$$\hat{S}^p(t) = T \cdot \hat{X}^p(t) \quad (\text{predicted sensory signals})$$

1489 
$$\delta S(t) = S(t) - \hat{S}^p(t) \quad (\text{sensory errors})$$

1490 
$$\hat{X}(t) = \hat{X}^p(t) + K(t) \cdot \delta S(t) \quad (\text{final estimates})$$

1491 The Kalman gain matrix  $K(t)$  is computed as:

1492 
$$K(t) = L^p(t) \cdot T' \cdot (T \cdot L^p(t) \cdot T' + R)^{-1}$$

1493 where  $L^p(t) = D \cdot L(t - \delta t) \cdot D' + Q$  and  $L(t) = (Id - K(t) \cdot T) \cdot L^p(t)$  are the covariance of the  
 1494 predicted and updated estimates,  $Q$  and  $R$  are the covariance matrices of  $E \cdot X^\varepsilon$  and  $S^\eta$ , and  $Id$  is an  
 1495 identity matrix. These equations are not shown in Fig. 1.

1496 The initial conditions of  $\hat{X}$  are set according to the initial head position in the simulated motion, and the  
 1497 initial value of  $L$  is  $L = Q$ .

1498 **Kalman filter algorithm developed**

1499 The inference is performed by applying the Kalman filter algorithm on Eqs. 7 – 8. The corresponding  
 1500 computations can be expanded in the following equations:

1501 *State predictions:*

1502  $\hat{\Omega}^p(t) = \Omega^u(t)$  (eq. 1c)

1503  $\hat{C}^p(t) = k_1 \cdot \hat{C}(t - \delta t) + k_2 \cdot \hat{\Omega}^p(t)$  (eq. 2c)

1504  $\hat{G}^p(t) = \hat{G}(t - \delta t) + dt \cdot \hat{\Omega}^p(t)$  (eq. 3c)

1505  $\hat{A}^p(t) = A^u(t)$  (eq. 4c)

1506 *Sensory predictions:*

1507  $\hat{V}^p(t) = \hat{\Omega}^p(t) - \hat{C}^p(t)$  (eq. 5c)

1508  $\hat{F}^p(t) = \hat{G}^p(t) + \hat{A}^p(t)$  (eq. 6c)

1509 *Sensory errors:*

1510  $\delta V(t) = V(t) - \hat{V}^p(t)$  (eq. 5d)

1511  $\delta F(t) = F(t) - \hat{F}^p(t)$  (eq. 6d)

1512 *Final estimates:*

1513  $\hat{\Omega}(t) = \hat{\Omega}^p(t) + \Omega^k = \hat{\Omega}^p(t) + k_{\delta V}^{\Omega} \cdot \delta V(t) + k_{\delta F}^{\Omega} \cdot \delta F(t)$  (eq. 1d)

1514  $\hat{C}(t) = \hat{C}^p(t) + C^k = \hat{C}^p(t) + k_{\delta V}^C \cdot \delta V(t) + k_{\delta F}^C \cdot \delta F(t)$  (eq. 2d)

1515  $\hat{G}(t) = \hat{G}^p(t) + G^k = \hat{G}^p(t) + k_{\delta V}^G \cdot \delta V(t) + k_{\delta F}^G \cdot \delta F(t)$  (eq. 3d)

1516  $\hat{A}(t) = \hat{A}^p(t) + A^k = \hat{A}^p(t) + k_{\delta V}^A \cdot \delta V(t) + k_{\delta F}^A \cdot \delta F(t)$  (eq. 4d)

1517 These equations form the basis of the model (in Fig. 9,  $k_{\delta V}^A$  and  $k_{\delta F}^{\Omega}$  are assumed to be zero, see ‘Kalman  
1518 feedback gains’ and Table 2).

### 1519 **Velocity Storage during EVAR**

1520 Here we analyze the Kalman filter equations to derive the dynamics of rotation perception during  
1521 passive EVAR and compare it to existing models. During passive EVAR ( $\hat{\Omega}^p = \Omega^u = 0$  and  $\delta F = 0$ ), the  
1522 dynamics of the rotation estimate depends of  $\hat{C}$ , which is governed by (eq. 2c, d):

1523  $\hat{C}^p(t) = k_1 \cdot \hat{C}(t - \delta t)$  (from eq. 2c)

1524  $\hat{C}(t) = \hat{C}^p(t) + k_{\delta V}^C \cdot \delta V$  (from eq. 2d)

1525 With:

1526  $\delta V = V(t) - \hat{V}^p(t) = V(t) + \hat{C}^p(t)$  (from eq. 5c, d)

1527 Based on these equations,  $\hat{C}$  follows a first-order differential equation:

1528  $\hat{C}(t) = \hat{C}^p(t) + k_{\delta V}^C \cdot (V(t) + \hat{C}^p(t)) = k_1 \cdot (1 + k_{\delta V}^C) \cdot \hat{C}(t - \delta t) + k_{\delta V}^C \cdot V(t)$  (eq. 2e)

1529 This equation is characteristic of a leaky integrator, that integrates  $V$  with a gain  $k_{\delta V}^C$ , and has a time  
1530 constant  $\tau_{VS}$  which is computed by solving:

1531  $(1 - \delta t / \tau_{VS}) = k_1 \cdot (1 + k_{\delta V}^C)$

1532 Based on the values of Table 2, we compute  $\tau_{VS}=16.5s$  (in agreement with the simulations in Fig. 4  
1533 Suppl. 2).

1534 The final rotation estimate is the sum of  $\hat{C}$  and the canal signal:

1535  $\hat{\Omega}(t) = k_{\delta V}^{\Omega} \cdot \delta V(t) = k_1 \cdot \hat{C}(t - \delta t) + k_{\delta V}^{\Omega} \cdot V(t)$  (from eq. 1d)

1536 These equations reproduce the standard model of (Raphan et al. 1979). Note that the gains  $k_{\delta V}^C =$   
1537  $0.19 \delta t$ ,  $\tau_{VS}=16.5s$ , and  $k_{\delta V}^{\Omega} = 0.94$  are similar to the values in (Raphan et al. 1979) and to model fits to  
1538 experimental data in (Laurens et al. 2011b). The dynamics of  $\hat{C}$  (eq. 2e) can be observed in simulations,  
1539 i.e. in Fig. 4 Suppl 2B where the leaky integrator is charged by vestibular signals  $V$  at  $t = 0$  to 10s and  $t =$   
1540  $60$  to 70s; and subsequently discharges with a time constant  $\tau_{VS}=16.5s$ . The discharge of the integrator  
1541 is also observed in Fig. 4 Suppl 2C when  $t>60s$  Fig. 6 Suppl 3C when  $t>120s$ .

1542 **Passive tilt**

1543 Here we provide additional mathematical analyses about motion estimation during passive tilt. During  
1544 passive tilt ( $\hat{\Omega}^p = \Omega^u = 0; F = G$ ), the internal estimate  $\hat{G}$  follows:

1545  $\hat{G}^p(t) = \hat{G}(t - \delta t)$  (from eq. 3c)

1546  $\hat{G}(t) = \hat{G}^p(t) + G^k$  with  $G^k = k_{\delta V}^G \cdot \delta V(t) + k_{\delta F}^G \cdot \delta F(t)$  (eq. 3d)

1547 First, we note that (eq. 3c, d) combine into  $\hat{G}(t) = \int_0^t G^k$ . In other words, the tilt estimate during  
 1548 passive tilt is computed by integrating feedback signals  $G^k$ .

1549 Also, to a first approximation, the gain  $k_{\delta V}^G$  is close to  $\delta t$ , the canal error  $\delta V$  encodes  $\Omega$  and  $\delta F$  is  
 1550 approximately null. In this case,  $G^k \approx \delta t \cdot \Omega$  and  $\hat{G}(t) \approx \int_0^t \Omega \cdot \delta t$ . Therefore, during passive tilt (Fig. 5,  
 1551 Fig. 5 Suppl. 1), the internal model (eq. 3c) integrates tilt velocity signals that originate from the canals  
 1552 and are conveyed by feedback pathways.

1553 Note, however, that the Kalman gain  $k_{\delta V}^G$  is slightly lower than  $\delta t$  ( $k_{\delta V}^G \approx 0.9\delta t$ ; Table 2). Yet, the final  
 1554 tilt estimate remains accurate due to an additional feedback originating from  $\delta F$  which can be analyzed  
 1555 as follows. Because  $k_{\delta V}^G < \delta t$ , the tilt estimate  $\hat{G}$  lags behind  $G$ , resulting in a small otolith error  
 1556  $\delta F = G(t) - \hat{G}^p(t)$  that contributes to the feedback signal (via the term  $k_{\delta F}^G \cdot \delta F(t)$  in eq. 3d). The value  
 1557 of  $\delta F$  stabilizes to a steady-state where  $\hat{G}(t) - \hat{G}(t - \delta t) = G(t) - G(t - \delta t) = \Omega \cdot \delta t$ . Based on eq. 3d,  
 1558 we obtain:

$$1559 \quad \hat{G}(t) - \hat{G}(t - \delta t) = k_{\delta V}^G \cdot \delta V(t) + k_{\delta F}^G \cdot \delta F(t) = \Omega \cdot \delta t,$$

$$1560 \quad \text{with } \delta V = \Omega, \delta F = (\delta t - k_{\delta V}^G) \cdot \Omega / k_{\delta F}^G \approx 0.13 \Omega \text{ (based on Table 2).}$$

1561 Thus, a feedback signal originating from the otolith error complements the canal error. This effect is  
 1562 nevertheless too small to be appreciated in Fig. 5.

### 1563 **Kalman feedback gains**

1564 Here we provide additional information about Kalman gains and we justify that some feedback signals  
 1565 are considered negligible.

1566 First, we note that some values of the Kalman gain matrix (those involved in a temporal integration),  
 1567 include the parameter  $\delta t$  (Table 2). This is readily explained by the following example. Consider, for  
 1568 instance, the gain of the vestibular feedback to the tilt estimate ( $k_{\delta V}^G$ ). During passive tilt, the tilt  
 1569 estimate  $\hat{G}(t)$  is tracked by the Kalman filter according to:

$$1570 \quad \hat{G}(t) = \hat{G}(t - \delta t) + k_{\delta V}^G \cdot \delta V(t) \quad (\text{from eq. 3c, d, with } \delta F \approx 0)$$

1571 Since  $\hat{G}$  is computed by integrating canal signals ( $\delta V$ ) over time, we would expect the equation above to  
 1572 be approximately equal to the following:

1573 
$$\hat{G}(t) = \hat{G}(t - \delta t) + \delta t \cdot \delta V(t)$$

1574 Therefore, we expect that  $k_{\delta V}^G \approx \delta t$ . When simulations are performed with  $\delta t = 0.01s$ , we find indeed  
1575 that  $k_{\delta V}^G = 0.009 = 0.9 \delta t$ . Furthermore, if simulations are performed again, but with  $t = 0.1s$ , we find  
1576  $k_{\delta V}^G = 0.09 = 0.9 \delta t$ . In other words, the Kalman gain computed by the filter is scaled as a function of  
1577  $\delta t$  in order to perform the operation of temporal integration (albeit with a gain of 0.9). For this reason,  
1578 we write  $k_{\delta V}^G = 0.9 \delta t$  in Table 2, which is more informative than  $k_{\delta V}^G = 0.009$ . Similarly, other Kalman  
1579 gain values corresponding to  $\hat{G}$  and  $\hat{C}$  (which is also computed by temporal integration of Kalman  
1580 feedbacks) are shown as a function of  $\delta t$  in Table 2.

1581 Furthermore, the values of  $C^k$  and  $G^k$  are divided by  $\delta t$  in all figures, for the same reason. If, for  
1582 example,  $\delta V = 1$ , then the corresponding value and  $G^k$  would be 0.009 ( $k_{\delta V}^G \cdot \delta V$ ). This value is correct  
1583 (since  $k_{\delta V}^G = 0.9 \delta t$ ) but would cause  $G^k$  to appear disproportionately small. In order to compensate for  
1584 this, we plot  $G^k / \delta t$  in the figures. The feedback  $C^k$  is scaled in a similar manner. In contrast, neither  $\Omega^k$   
1585 nor  $A^k$  are scaled.

1586 Note that the feedback gain  $k_{\delta V}^A$  (from the canal error  $\delta V$  to  $\hat{A}$ ) is equal to  $-k_{\delta V}^G$  (Table 2). This  
1587 compensates for a part of the error  $\delta F$  during tilt (see previous section), which generates an erroneous  
1588 acceleration feedback  $A^k$ . This component has a negligible magnitude and is not discussed in the text or  
1589 included in the model of Fig. 9.

1590 Note also that the Kalman filter gain  $k_{\delta F}^{\Omega}$  is practically equal to zero (Table 2). In practice, this means that  
1591 the otoliths affect rotation perception only through variable  $\hat{C}$ . Accordingly, otolith-generated rotation  
1592 signals (e.g. Fig. 6 Suppl. 3C, from  $t = 60s$  to  $t = 120s$ ) exhibit low-pass dynamics.

1593 Because  $k_{\delta V}^A$  and  $k_{\delta F}^{\Omega}$  are practically null and have no measurable effect on behavioral or neuronal  
1594 responses, the corresponding feedback pathways are excluded from Fig. 9.

### 1595 **Time constant of the somatogravic effect**

1596 Here we analyze the dynamics of the somatogravic effect. During passive linear acceleration, the otolith  
1597 error  $\delta F$  determines the feedback  $G^k$  that aligns  $\hat{G}$  with  $F$  and therefore minimizes the feedback. This  
1598 process can be modeled as a low-pass filter based on the following equations:

1599 
$$\delta F(t) = F(t) - \hat{F}^p(t) = A(t) - \hat{G}(t - \delta t) \quad (\text{eq. 3c, 6c, 6d})$$



1600 
$$\hat{G}(t) = \hat{G}^p(t) + G^k = \hat{G}(t - \delta t) + k_{\delta F}^G \cdot \delta F(t) \quad (\text{eq. 3c, 3d, neglecting } \delta V)$$

1601 Leading to:

1602 
$$\hat{G}(t) = \hat{G}(t - \delta t) + k_{\delta F}^G \cdot (A(t) - \hat{G}(t - \delta t))$$

1603 This equation illustrates that  $\hat{G}$  is a low-pass filter that converges towards  $A$  with a time constant  $\tau_s =$   
1604  $\delta t / k_{\delta F}^G = 1.3\text{s}$  (Table 2).

1605 Note that the feedback from  $\delta F$  to  $\hat{G}$  adds, indirectly, a second component to the differential equation  
1606 above, leading  $\hat{G}$  to transiently overshoot  $A$  in Fig. 6 Suppl. 1. Nonetheless, describing the somatogravic  
1607 effect as a first-order low-pass filter is accurate enough for practical purposes.

### 1608 **Model of motor commands**

1609 In this model, we have assumed that motor commands simply encode head rotation velocity and linear  
1610 acceleration. However, more complex models could be designed where motor commands affect other  
1611 movement parameters. These models would be encoded by changing the matrices  $M$  and  $X^u$ .

1612 However, neither  $M$  nor  $X^u$  appear in the Kalman filter algorithm outside of (eq. 7). Therefore, the only  
1613 role of the motor command is to contribute to the prediction (eq. 7). Importantly, motor commands  $X^u$   
1614 don't carry any noise (motor noise is a part of  $X^\varepsilon$ ); and neither  $M$  nor  $X^u$  participate in the computing of  
1615 the Kalman gain matrix  $K$ . Therefore, changing the model of motor commands would have no effect on  
1616 Kalman feedbacks.

1617 Furthermore, in all simulations presented in this study, we have observed that motor commands were  
1618 transformed into  $\hat{X}^p$  that encoded active movement accurately. We reason that, if the model of motor  
1619 commands was changed, it would still lead to accurate predictions of the self-generated motion  
1620 component, as long as the motor inputs are unbiased and are sufficient to compute all motion variables,  
1621 either directly or indirectly through the internal model. Under these hypotheses, simulation results  
1622 would remain unchanged. This justifies our approach of using the simplest possible model of motor  
1623 commands.

### 1624 **Visual rotation signals**

1625 In Fig. 4 Suppl. 2C, a visual sensory signal  $Vis$  was added to the model as in (Laurens 2006, Laurens and  
1626 Droulez 2008) by simply assuming that it encodes rotation velocity:

1627 
$$Vis(t) = \Omega + Vis^\eta$$

1628 Where  $Vis^\eta$  is a Gaussian noise with standard deviation  $\sigma_{Vis} = 0.12$  rad/s (Laurens and Droulez 2008).

1629 This signal is incorporated into the matrices of the sensory model as follows:

1630 
$$S = \begin{bmatrix} V \\ F \\ Vis \end{bmatrix}, T = \begin{bmatrix} 1 & -1 & 0 & 0 \\ 0 & 0 & 1 & 1 \\ 1 & 0 & 0 & 0 \end{bmatrix}, S^\eta = \begin{bmatrix} V^\eta \\ F^\eta \\ Vis^\eta \end{bmatrix}, R = \begin{bmatrix} \sigma_V^2 & 0 & 0 \\ 0 & \sigma_F^2 & 0 \\ 0 & 0 & \sigma_{Vis}^2 \end{bmatrix}$$

1631 The model of head motion and the matrix equations of the Kalman filter remain unchanged.

1632 **Model of head and neck rotations**

1633 We created a variant of the Kalman filter, where trunk velocity in space and head velocity relative to the  
 1634 trunk are two independent variables  $\Omega_{TS}$  and  $\Omega_{HT}$ . We assumed that head position relative to the trunk  
 1635 is sensed by neck proprioceptors. To model this, we added an additional variable  $N$  (for ‘neck’) that  
 1636 encodes the position of the head relative to the trunk:  $N = \int \Omega_{HT}. dt$ . We also added a sensory modality  
 1637  $P$  that represents neck proprioception.

1638 Total head velocity (which is not an explicit variable in the model but may be computed as  $\Omega = \Omega_{TS} +$   
 1639  $\Omega_{HT}$ ) is sensed through the semicircular canals, which were modeled as previously.

1640 The model of head and trunk motion is based on the following equations:

$$\begin{cases} \Omega_{TS}(t) = & 0 & + \Omega_{TS}^u(t) + \Omega_{TS}^\varepsilon(t) & (eq. S1) \\ \Omega_{HT}(t) = & 0 & + \Omega_{HT}^u(t) + \Omega_{HT}^\varepsilon(t) & (eq. S2) \\ N(t) = & N(t - \delta t) + \delta t \cdot \Omega_{HT}(t) & + 0 + 0 & (eq. S3) \\ C(t) = & k_1 \cdot C(t - \delta t) + k_2 \cdot (\Omega_{TS}(t) + \Omega_{HT}(t)) & + 0 + 0 & (eq. S4) \end{cases}$$

1641 Note that (eq. S1) and (eq. S2), are analogous to (eq. 1) in the main model and imply that  $\Omega_{TS}$  and  $\Omega_{HT}$   
 1642 are the sum of self-generated ( $\Omega_{TS}^u, \Omega_{HT}^u$ ) and unpredictable components ( $\Omega_{TS}^\varepsilon, \Omega_{HT}^\varepsilon$ ). Eq. S3 encodes  
 1643  $N = \int \Omega_{HT}. dt$ . The canal model (eq. S4) is identical as in (eq. 2), the input being the velocity of the head  
 1644 in space, i.e.  $\Omega_{TS}(t) + \Omega_{HT}(t)$ .

1645 The sensory model includes the canal signal  $V$  and a neck proprioceptive signal  $P$  that encodes neck  
 1646 position:

1647 
$$\begin{cases} V(t) = \Omega_{TS}(t) + \Omega_{HT}(t) - C(t) + V^\eta(t) & (eq. S5) \\ P(t) = N(t) + P^\eta(t) & (eq. S6) \end{cases}$$

1648 Note that (eq. S5) is identical to (eq. 5) in the main model, and that  $P$  is subject to sensory noise  $P^\eta$ .

1649 Similar to the main model, (eq. S1 – S6) are written in matrix form:

1650 
$$X(t) = D \cdot X(t - \delta t) + M \cdot X^u(t) + E \cdot X^\varepsilon(t) \quad (\text{eq. S7})$$

1651 with:

1652 
$$X = \begin{bmatrix} \Omega_{TS} \\ \Omega_{HT} \\ N \\ C \end{bmatrix}, D = \begin{bmatrix} 0 & 0 & 0 & 0 \\ 0 & 0 & 0 & 0 \\ 0 & 0 & 1 & 0 \\ 0 & 0 & 0 & k_1 \end{bmatrix}, M = \begin{bmatrix} 1 & 0 \\ 0 & 1 \\ \delta t & 0 \\ k_2 & k_2 \end{bmatrix}, X^u = \begin{bmatrix} \Omega_{TS}^u \\ \Omega_{HT}^u \end{bmatrix}, E = M, X^\varepsilon = \begin{bmatrix} \Omega_{TS}^\varepsilon \\ \Omega_{HT}^\varepsilon \end{bmatrix}$$

1653 Similarly, the model of sensory transduction (eq. S5 – S6) is rewritten as:

1654 
$$S(t) = T \cdot X(t) + S^\eta(t) \quad (\text{eq. S8})$$

1655 with:

1656 
$$S = \begin{bmatrix} V \\ P \end{bmatrix}, T = \begin{bmatrix} 1 & 1 & 0 & -1 \\ 0 & 0 & 1 & 0 \end{bmatrix}, S^\eta = \begin{bmatrix} V^\eta \\ P^\eta \end{bmatrix}$$

1657 Given the standard deviations of  $\Omega_{TS}^\varepsilon$ ,  $\Omega_{HT}^\varepsilon$ ,  $V^\eta$  and  $P^\eta$  ( $\sigma_{TS}$ ,  $\sigma_{HT}$ ,  $\sigma_V$  and  $\sigma_P$ ), the covariance matrices of  
1658  $X^\varepsilon$  and  $S^\eta$  are respectively:

1659 
$$Q = E \cdot \begin{bmatrix} \sigma_{TS}^2 & 0 \\ 0 & \sigma_{HT}^2 \end{bmatrix} \cdot E' \text{ and } R = \begin{bmatrix} \sigma_V^2 & 0 \\ 0 & \sigma_P^2 \end{bmatrix}$$

1660 Simulations were performed using the Kalman filter algorithm, as in the main model.

### 1661 **Feedback signals during neck movement**

1662 In Fig. 7 Suppl. 2,3, we note that passive neck motion induces a proprioceptive feedback  $\delta P$  that  
1663 encodes neck velocity, although proprioceptive signals  $P$  are assumed to encode neck position. This  
1664 dynamic transformation is explained by considering that, during passive motion:

1665 
$$\hat{N}^p(t) = \hat{N}(t - \delta t)$$

1666 
$$\hat{N}(t) = \hat{N}^p(t) + N^k = \hat{N}(t - \delta t) + k_{\delta V}^N \cdot \delta V + k_{\delta P}^N \cdot \delta P$$

1667 Because  $k_{\delta V}^N \approx 0$  (Table 3), neck position is updated exclusively by its own proprioceptive feedback  $\delta P$ .

1668 Furthermore, the equation above is transformed into:

1669 
$$\hat{N}(t) - \hat{N}(t - \delta t) = k_{\delta P}^N \cdot \delta P$$

1670 In a steady-state,  $\hat{N}(t) - \hat{N}(t - \delta t) = N(t) - N(t - \delta t) = \Omega_{HT} \cdot \delta t$ , leading to:

1671 
$$\delta P = \Omega_{HT} \cdot \delta t / k_{\delta P}^N \text{ i.e. } \delta P \approx \Omega_{HT} \cdot \delta t \text{ (with } k_{\delta P}^N \approx 1)$$

1672 Thus, similar to the reasons already pointed out in section “Kalman feedback gains”, the feedback signal  
1673  $\delta P$  is scaled by  $1/\delta t$  in Fig. 7 Suppl. 1-3. Also, because the gain  $k_{\delta P}^N$  (which is close to 1, see Table 3)  
1674 doesn’t scale with  $\delta t$ , the feedback  $N^k = k_{\delta P}^N \cdot \delta P$  is also scaled by  $1/\delta t$  in Fig. 7 Suppl. 1-3.

1675 Importantly, the equations above indicate that neck proprioception error should encode neck velocity  
1676 even when the proprioceptive signals are assumed to encode neck position.

1677 Next, we note that, during passive neck rotation, the estimate of head velocity relative to the trunk is  
1678 determined by  $\hat{\Omega}_{HT} = k_{\delta P}^{\Omega_{HT}} \cdot \delta P$ . Since  $\delta P \approx \Omega_{HT} \cdot \delta t$ , we expect that  $k_{\delta P}^{\Omega_{HT}} \approx 1/\delta t$ . Accordingly,  
1679 simulations performed with  $\delta t = 0.01s$  yield  $k_{\delta P}^{\Omega_{HT}} = 89 = 0.89/\delta t$ . Furthermore, performing  
1680 simulations with  $\delta t = 0.1s$  leads to  $k_{\delta P}^{\Omega_{HT}} = 8.9 = 0.89/\delta t$ . We find that  $k_{\delta P}^{\Omega_{TS}}$  is also dependent of  $\delta t$ .  
1681 Therefore, the corresponding Kalman gains scale with  $\delta t$  in Table 3.

1682 Note that the considerations above can equally explain the amplitude and dynamics of the predicted  
1683 neck position and of the neck proprioceptive error in Fig. 7 Suppl. 6. The simulation in Fig. 7 Suppl. 6C is  
1684 identical (with half the amplitude) to a passive rotation of the head relative to the trunk (Fig. 7 Suppl. 2),  
1685 where  $\delta P = \delta V > 0$ . The simulation in Fig. 7 Suppl. 6C can be explained mathematically by noticing that  
1686 it is equivalent to an active head motion (where  $\delta P = 0$ ) superimposed to a passive rotation of the head  
1687 with a gain of 0.5 and in the opposite direction, resulting in  $\delta P = \delta V < 0$ .

### 1688 **Three-dimensional Kalman filter**

1689 For the sake of simplicity, we have restricted our model to one dimension in this study. However,  
1690 generalizing the model to three-dimensions may be useful for further studies and is relatively easily  
1691 accomplished, by (1) replacing one-dimensional variables by three-dimensional vectors and (2) locally  
1692 linearizing a non-linearity that arises from a vectorial cross-product (eq. 9 below), as shown in this  
1693 section.

1694 *Principle:* Generalization of the Kalman filter to three dimensions requires replacing each motion and  
1695 sensory parameter with a 3D vector. For instance,  $\Omega$  is replaced by  $\Omega_x$ ,  $\Omega_y$  and  $\Omega_z$  that encode the

1696 three-dimensional rotation vector in a head-fixed reference frame  $(x, y, z)$ . Sensory variables are also  
 1697 replaced by three variables, i.e.  $(V_x, V_y, V_z)$  and  $(F_x, F_y, F_z)$  that encode afferent signals from the canals  
 1698 and otoliths in three dimensions.

1699 With one exception, all variables along one axis (e.g.  $\Omega_x, C_x, G_x, A_x, V_x, F_x$  along the  $x$  axis) are governed  
 1700 by the same set of equations (eqn 1 – 6) as the main model. Therefore, the full 3D model can be  
 1701 thought of as three independent Kalman filters operating along the  $x, y$  and  $z$  dimensions. The only  
 1702 exception is the three-dimensional computation of tilt, which follows the equation:

$$1703 \quad \vec{G}(t) = \vec{G}(t - \delta t) + \delta t \cdot \vec{G}(t - \delta t) \times \vec{\Omega}(t) \quad (eq. 9)$$

1704 Where  $\vec{G}$  and  $\vec{\Omega}$  are vectorial representations of  $(G_x, G_y, G_z)$  and  $(\Omega_x, \Omega_y, \Omega_z)$ , and  $\times$  represents a  
 1705 vectorial cross-product. In matrix form,

$$1706 \quad \delta t \cdot \vec{G} \times \vec{\Omega} = \delta t \cdot \begin{bmatrix} G_x \\ G_y \\ G_z \end{bmatrix} \times \begin{bmatrix} \Omega_x \\ \Omega_y \\ \Omega_z \end{bmatrix} = \delta t \cdot \begin{bmatrix} G_y \cdot \Omega_z - G_z \cdot \Omega_y \\ G_z \cdot \Omega_x - G_x \cdot \Omega_z \\ G_x \cdot \Omega_y - G_y \cdot \Omega_x \end{bmatrix}$$

1707 This non-linearity is implemented by placing the terms  $\delta t$  and  $(G_x, G_y, G_z)$  in the matrices  $M$  and  $E$  that  
 1708 integrate rotation inputs  $(\Omega^u$  and  $\Omega^\varepsilon)$  into tilt, as shown below.

1709 *Implementation:* The implementation of the 3D Kalman filter is best explained by demonstrating how  
 1710 the matrices of the 1D filter are replaced by scaled-up matrices.

1711 First, we replace all motion variables and inputs by triplets of variables along  $x, y$  and  $z$ :

$$1712 \quad X = \begin{bmatrix} \Omega \\ C \\ G \\ A \end{bmatrix}, X^u = \begin{bmatrix} \Omega^u \\ A^u \end{bmatrix}, X^\varepsilon = \begin{bmatrix} \Omega^\varepsilon \\ A^\varepsilon \end{bmatrix} \text{ are replaced by: } X = \begin{bmatrix} \Omega_x \\ \Omega_y \\ \Omega_z \\ C_x \\ C_y \\ C_z \\ G_x \\ G_y \\ G_z \\ A_x \\ A_y \\ A_z \end{bmatrix}, X^u = \begin{bmatrix} \Omega_x^u \\ \Omega_y^u \\ \Omega_z^u \\ A_x^u \\ A_y^u \\ A_z^u \end{bmatrix}, X^\varepsilon = \begin{bmatrix} \Omega_x^\varepsilon \\ \Omega_y^\varepsilon \\ \Omega_z^\varepsilon \\ A_x^\varepsilon \\ A_y^\varepsilon \\ A_z^\varepsilon \end{bmatrix}$$

1713 Next, we scale the matrix  $D$  up; each non-zero element in the 1D version being repeated twice in the 3D  
 1714 version:

$$1715 \quad D = \begin{bmatrix} 0 & 0 & 0 & 0 \\ 0 & k_1 & 0 & 0 \\ 0 & 0 & 1 & 0 \\ 0 & 0 & 0 & 0 \end{bmatrix} \text{ is replaced by } D = \begin{bmatrix} 0 & 0 & 0 & 0 & 0 & 0 & 0 & 0 & 0 & 0 & 0 & 0 \\ 0 & 0 & 0 & 0 & 0 & 0 & 0 & 0 & 0 & 0 & 0 & 0 \\ 0 & 0 & 0 & 0 & 0 & 0 & 0 & 0 & 0 & 0 & 0 & 0 \\ 0 & 0 & 0 & k_1 & 0 & 0 & 0 & 0 & 0 & 0 & 0 & 0 \\ 0 & 0 & 0 & 0 & k_1 & 0 & 0 & 0 & 0 & 0 & 0 & 0 \\ 0 & 0 & 0 & 0 & 0 & k_1 & 0 & 0 & 0 & 0 & 0 & 0 \\ 0 & 0 & 0 & 0 & 0 & 0 & 1 & 0 & 0 & 0 & 0 & 0 \\ 0 & 0 & 0 & 0 & 0 & 0 & 0 & 1 & 0 & 0 & 0 & 0 \\ 0 & 0 & 0 & 0 & 0 & 0 & 0 & 0 & 1 & 0 & 0 & 0 \\ 0 & 0 & 0 & 0 & 0 & 0 & 0 & 0 & 0 & 1 & 0 & 0 \\ 0 & 0 & 0 & 0 & 0 & 0 & 0 & 0 & 0 & 0 & 1 & 0 \\ 0 & 0 & 0 & 0 & 0 & 0 & 0 & 0 & 0 & 0 & 0 & 1 \end{bmatrix}$$

1716 We build  $M$  in a similar manner. Furthermore, the element  $s \cdot \delta t$  (that encodes the integration of  $\Omega^u$  into  
 1717  $G$ ) is replaced by a set of terms that encode the cross-product in (eq. 9). As previously,  $E = M$ . Note  
 1718 that  $M$  and  $E$  must be recomputed at each iteration since  $G_x, G_y$  and  $G_z$  change continuously.

$$1719 \quad M = \begin{bmatrix} 1 & 0 \\ k_2 & 0 \\ s \cdot \delta t & 0 \\ 0 & 1 \end{bmatrix} \text{ is replaced by } M = \begin{bmatrix} 1 & 0 & 0 & 0 & 0 & 0 \\ 0 & 1 & 0 & 0 & 0 & 0 \\ 0 & 0 & 1 & 0 & 0 & 0 \\ k_2 & 0 & 0 & 0 & 0 & 0 \\ 0 & k_2 & 0 & 0 & 0 & 0 \\ 0 & 0 & k_2 & 0 & 0 & 0 \\ 0 & -G_z \cdot \delta t & G_y \cdot \delta t & 0 & 0 & 0 \\ G_z \cdot \delta t & 0 & -G_x \cdot \delta t & 0 & 0 & 0 \\ -G_y \cdot \delta t & G_x \cdot \delta t & 0 & 0 & 0 & 0 \\ 0 & 0 & 0 & 1 & 0 & 0 \\ 0 & 0 & 0 & 0 & 1 & 0 \\ 0 & 0 & 0 & 0 & 0 & 1 \end{bmatrix}$$

1720 Similarly, we build the sensor model as follows:

$$1721 \quad S = \begin{bmatrix} V \\ F \end{bmatrix} \text{ and } S^\eta = \begin{bmatrix} V^\eta \\ F^\eta \end{bmatrix} \text{ are replaced by } S = \begin{bmatrix} V_x \\ V_y \\ V_z \\ F_x \\ F_y \\ F_z \end{bmatrix} \text{ and } S^\eta = \begin{bmatrix} V_x^\eta \\ V_y^\eta \\ V_z^\eta \\ F_x^\eta \\ F_y^\eta \\ F_z^\eta \end{bmatrix}$$

1722  $T = \begin{bmatrix} 1 & -1 & 0 & 0 \\ 0 & 0 & 1 & 1 \end{bmatrix}$  is replaced by  $T = \begin{bmatrix} 1 & 0 & 0 & -1 & 0 & 0 & 0 & 0 & 0 & 0 & 0 & 0 \\ 0 & 1 & 0 & 0 & -1 & 0 & 0 & 0 & 0 & 0 & 0 & 0 \\ 0 & 0 & 1 & 0 & 0 & -1 & 0 & 0 & 0 & 0 & 0 & 0 \\ 0 & 0 & 0 & 0 & 0 & 0 & 1 & 0 & 0 & 1 & 0 & 0 \\ 0 & 0 & 0 & 0 & 0 & 0 & 0 & 1 & 0 & 0 & 1 & 0 \\ 0 & 0 & 0 & 0 & 0 & 0 & 0 & 0 & 1 & 0 & 0 & 1 \end{bmatrix}$

1723  $Q = E \cdot \begin{bmatrix} \sigma_{\Omega}^2 & 0 \\ 0 & \sigma_A^2 \end{bmatrix} \cdot E'$  and  $R = \begin{bmatrix} \sigma_V^2 & 0 \\ 0 & \sigma_F^2 \end{bmatrix}$  are replaced by:

1724  $Q = E \cdot \begin{bmatrix} \sigma_{\Omega}^2 & 0 & 0 & 0 & 0 & 0 \\ 0 & \sigma_{\Omega}^2 & 0 & 0 & 0 & 0 \\ 0 & 0 & \sigma_{\Omega}^2 & 0 & 0 & 0 \\ 0 & 0 & 0 & \sigma_A^2 & 0 & 0 \\ 0 & 0 & 0 & 0 & \sigma_A^2 & 0 \\ 0 & 0 & 0 & 0 & 0 & \sigma_A^2 \end{bmatrix} \cdot E'$  and  $R = \begin{bmatrix} \sigma_V^2 & 0 & 0 & 0 & 0 & 0 \\ 0 & \sigma_V^2 & 0 & 0 & 0 & 0 \\ 0 & 0 & \sigma_V^2 & 0 & 0 & 0 \\ 0 & 0 & 0 & \sigma_F^2 & 0 & 0 \\ 0 & 0 & 0 & 0 & \sigma_F^2 & 0 \\ 0 & 0 & 0 & 0 & 0 & \sigma_F^2 \end{bmatrix}$

1725
